# Supplementary material for: Is self-rated health associated with cardiovascular risk factors and disease in a low-income setting? A cross-sectional study from the Amazon Basin of Brazil
Source: PubMed Central journal article supplement — BMJ Open. 2022 Aug 30;12(8):e058277. doi: 10.1136/bmjopen-2021-058277 (PMC9438027; doi:10.1136/bmjopen-2021-058277), 2022-08-30
Supplement: bmjopen-2021-058277.draft_revisions.pdf [file bmjopen-2021-058277.draft_revisions.pdf]

# BMJ Open

BMJ Open is committed to open peer review. As part of this commitment we make the peer review history of every article we publish publicly available.

When an article is published we post the peer reviewers' comments and the authors' responses online. We also post the versions of the paper that were used during peer review. These are the versions that the peer review comments apply to.

The versions of the paper that follow are the versions that were submitted during the peer review process. They are not the versions of record or the final published versions. They should not be cited or distributed as the published version of this manuscript.

BMJ Open is an open access journal and the full, final, typeset and author-corrected version of record of the manuscript is available on our site with no access controls, subscription charges or pay-per-view fees (<http://bmjopen.bmj.com>).

If you have any questions on BMJ Open's open peer review process please email [info.bmjopen@bmj.com](mailto:info.bmjopen@bmj.com)

# BMJ Open

## Association between self-rated health, cardiovascular risk factors and echocardiography: A study from the Amazon Basin, Brazil

|                               |                                                                                                                                                                                                                                                                                                                                                                                                                                                                                                                                                                                                                                                                                                                                                                                                                                                                                                                                                                                                                                                                                                                                                                                                                                                                                                                                                                                                                                                                                                                                 |
|-------------------------------|---------------------------------------------------------------------------------------------------------------------------------------------------------------------------------------------------------------------------------------------------------------------------------------------------------------------------------------------------------------------------------------------------------------------------------------------------------------------------------------------------------------------------------------------------------------------------------------------------------------------------------------------------------------------------------------------------------------------------------------------------------------------------------------------------------------------------------------------------------------------------------------------------------------------------------------------------------------------------------------------------------------------------------------------------------------------------------------------------------------------------------------------------------------------------------------------------------------------------------------------------------------------------------------------------------------------------------------------------------------------------------------------------------------------------------------------------------------------------------------------------------------------------------|
| Journal:                      | <i>BMJ Open</i>                                                                                                                                                                                                                                                                                                                                                                                                                                                                                                                                                                                                                                                                                                                                                                                                                                                                                                                                                                                                                                                                                                                                                                                                                                                                                                                                                                                                                                                                                                                 |
| Manuscript ID                 | bmjopen-2021-058277                                                                                                                                                                                                                                                                                                                                                                                                                                                                                                                                                                                                                                                                                                                                                                                                                                                                                                                                                                                                                                                                                                                                                                                                                                                                                                                                                                                                                                                                                                             |
| Article Type:                 | Original research                                                                                                                                                                                                                                                                                                                                                                                                                                                                                                                                                                                                                                                                                                                                                                                                                                                                                                                                                                                                                                                                                                                                                                                                                                                                                                                                                                                                                                                                                                               |
| Date Submitted by the Author: | 27-Oct-2021                                                                                                                                                                                                                                                                                                                                                                                                                                                                                                                                                                                                                                                                                                                                                                                                                                                                                                                                                                                                                                                                                                                                                                                                                                                                                                                                                                                                                                                                                                                     |
| Complete List of Authors:     | <p>Holm, Anna Engell; Gentofte Hospital, Department of Cardiology; Federal University of Acre, Multidisciplinary Center</p> <p>Gomes, Laura ; University of São Paulo Institute of Biomedical Sciences, Department of Parasitology</p> <p>Wegener, Alma; Gentofte Hospital, Department of Cardiology; Federal University of Acre, Multidisciplinary Center</p> <p>Lima, Karine ; Federal University of Acre, Multidisciplinary Center</p> <p>Matos, Luan; Federal University of Acre, Multidisciplinary Center</p> <p>Vieira, Isabelle ; Federal University of Acre, Multidisciplinary Center</p> <p>Kaagaard, Molly ; Gentofte Hospital, Department of Cardiology; Federal University of Acre, Multidisciplinary Center</p> <p>Pareek, Manan; Gentofte Hospital, Department of Cardiology; Yale-New Haven Hospital, Department of Internal Medicine, Yale New Haven Hospital, Yale University School of Medicine, New Haven, Connecticut, USA</p> <p>Medeiros de Souza, Rodrigo ; Federal University of Acre, Multidisciplinary Center</p> <p>Romero Farias Marinho, Claudio ; University of São Paulo Institute of Biomedical Sciences, Department of Parasitology</p> <p>Biering-Sorensen, Tor; Gentofte Hospital, Department of Cardiology; University of Copenhagen Department of Biomedical Sciences</p> <p>Silvestre, Odilson; Federal University of Acre, Health and Sport Science Center</p> <p>Brainin, Philip; Gentofte Hospital, Department of Cardiology; Federal University of Acre, Multidisciplinary Center</p> |
| Keywords:                     | Public health < INFECTIOUS DISEASES, MENTAL HEALTH, CARDIOLOGY                                                                                                                                                                                                                                                                                                                                                                                                                                                                                                                                                                                                                                                                                                                                                                                                                                                                                                                                                                                                                                                                                                                                                                                                                                                                                                                                                                                                                                                                  |

SCHOLARONE™  
Manuscripts

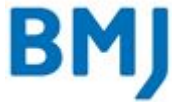

I, the Submitting Author has the right to grant and does grant on behalf of all authors of the Work (as defined in the below author licence), an exclusive licence and/or a non-exclusive licence for contributions from authors who are: i) UK Crown employees; ii) where BMJ has agreed a CC-BY licence shall apply, and/or iii) in accordance with the terms applicable for US Federal Government officers or employees acting as part of their official duties; on a worldwide, perpetual, irrevocable, royalty-free basis to BMJ Publishing Group Ltd ("BMJ") its licensees and where the relevant Journal is co-owned by BMJ to the co-owners of the Journal, to publish the Work in this journal and any other BMJ products and to exploit all rights, as set out in our [licence](#).

The Submitting Author accepts and understands that any supply made under these terms is made by BMJ to the Submitting Author unless you are acting as an employee on behalf of your employer or a postgraduate student of an affiliated institution which is paying any applicable article publishing charge ("APC") for Open Access articles. Where the Submitting Author wishes to make the Work available on an Open Access basis (and intends to pay the relevant APC), the terms of reuse of such Open Access shall be governed by a Creative Commons licence – details of these licences and which [Creative Commons](#) licence will apply to this Work are set out in our licence referred to above.

Other than as permitted in any relevant BMJ Author's Self Archiving Policies, I confirm this Work has not been accepted for publication elsewhere, is not being considered for publication elsewhere and does not duplicate material already published. I confirm all authors consent to publication of this Work and authorise the granting of this licence.

# Association between self-rated health, cardiovascular risk factors and echocardiography: A study from the Amazon Basin, Brazil

Short title: Self-rated health and cardiac disease in the Amazon

Anna E. Holm, MD<sup>1,2</sup>; Laura Cordeiro Gomes<sup>4</sup>; Alma Wegener, BSc<sup>1,2</sup>; Karine O. Lima<sup>1</sup>; Luan O. Matos<sup>1</sup>; Isabelle V. M. Vieira<sup>1</sup>; Molly D. Kaagaard<sup>1,2</sup>; Manan Pareek, MD, PhD<sup>2,3</sup>; Rodrigo Medeiros de Souza, PhD<sup>1</sup>; Claudio Romero Farias Marinho, PhD<sup>4</sup>; Tor Biering-Sørensen, MD, PhD, MPH<sup>2,5</sup>; Odilson M. Silvestre, MD, PhD, MPH<sup>6</sup>; Philip Brainin, MD, PhD<sup>1,2</sup>

1) Multidisciplinary Center, Federal University of Acre, Câmpus Floresta, Cruzeiro do Sul, Acre, Brazil

2) Department of Cardiology, Herlev-Gentofte University Hospital, Hellerup, Denmark

3) Department of Internal Medicine, Yale New Haven Hospital, Yale University School of Medicine, New Haven, Connecticut, USA

4) Department of Parasitology, Institute of Biomedical Sciences, University of São Paulo, São Paulo, Brazil

5) Faculty of Biomedical Sciences, Copenhagen University, Copenhagen, Denmark

6) Health and Sport Science Center, Federal University of Acre, Rio Branco, Acre, Brazil

**Conflicts of interest:** The authors report no conflicts of interest

## Corresponding author:

Philip Brainin, MD, PhD

Estrada do Canela Fina, Km 12, Gleba Formoso

Federal University of Acre, Multidisciplinary Center, Câmpus Floresta

Cruzeiro do Sul, Acre, Brazil - ZIP 69980-00 AC

Mail: denlillefilur@hotmail.com

Cellphone: +45 29425299

Total word count: 2,904 (excluding tabs and references)

## Abstract

**Objective:** Self-rated health is associated with cardiovascular mortality. We assessed the relationship between self-rated health, cardiovascular risk factors, and subclinical cardiac disease in the Amazon Basin.

**Setting:** Cross-sectional study where self-rated health was obtained according to a visual analogue scale, ranging from 0 (poor) to 100 (excellent). We performed questionnaires, physical examination, and echocardiography. Logistic and linear regression models were applied to assess self-rated health, cardiac risk factors and cardiac disease by echocardiography. Multivariable models were mutually adjusted for other cardiovascular risk factors, clinical and socioeconomic data, and known cardiac disease.

**Results:** A total of 574 participants (mean age 41 years, 61% female) provided information on self-rated health (mean  $75 \pm 21$  [interquartile range 60 to 90] points). Self-rated health (per 10-point increase) was negatively associated with hypertension (OR 0.87 [95%CI 0.78-0.97],  $P=0.01$ ), hypercholesterolemia (OR 0.89 [95%CI 0.80-0.99],  $P=0.04$ ) and positively with healthy diet (OR 1.13 [95%CI 1.04-1.24],  $P=0.004$ ). Sex modified these associations ( $P$ -interaction $<0.05$ ) such that higher self-rated health was associated with healthy diet and physical activity in men, and lower odds of hypertension and hypercholesterolemia in women. No relationship was found with left ventricular ejection fraction $<45\%$  (OR 0.88 [95%CI 0.73 to 1.08],  $P=0.22$ ), left ventricular hypertrophy (OR 0.89 [95%CI 0.78 to 1.02],  $P=0.09$ ), or diastolic dysfunction (OR 0.92 [95%CI 0.75 to 1.15],  $P=0.47$ ).

**Conclusion:** Self-rated health was positively associated with health parameters in the Amazon Basin, but not with subclinical cardiac disease by echocardiography. Assessment

1  
2  
3  
4 of self-rated health could be useful for screening or as a target in healthcare policies for  
5  
6 lifestyle interventions.  
7  
8  
9

10  
11 Words: 254  
12

13 Keywords: self-rated health; cardiovascular risk factors; echocardiography, low and  
14  
15 middle-income countries  
16  
17

### 20 **Article summary**

#### 22 **Strengths and limitations**

- 25 - Self-rated health was positively associated with a healthy lifestyle, and this  
26 relationship was modified by sex.  
27
- 29 - Importantly, self-rated health was not associated with cardiac disease by  
30 echocardiography.  
31
- 33 - Healthcare policies could potentially utilize self-rated health for cardiovascular risk  
34 screening or as a target to improve health behavior.  
35  
36  
37  
38  
39  
40  
41  
42  
43  
44  
45  
46  
47  
48  
49  
50  
51  
52  
53  
54  
55  
56  
57  
58  
59  
60

## Introduction

Cardiovascular disease is the leading cause of mortality worldwide and accounts for more than 31% of all deaths and 8% of public hospitalizations in Brazil [1,2]. Since the 1960s, Brazil has experienced a transition in health behavior and cardiovascular risk factors, where tobacco consumption has declined and obesity has increased [3]. Approximately 35% of Brazilian adults suffer from hypertension [4], the prevalence of diabetes mellitus is rising [5], and a high proportion of adults do not practice recommended levels of physical activity [1]. Differences in perception of risk factors and variability in access to healthcare unequivocally affect health behavior and the lifetime risk of cardiovascular disease. In this regard, self-rated health is widely used as a health indicator in various populations [6], is strongly associated with cardiovascular morbidity [7,8], and provides prognostic information on mortality [9]. Self-rated health and cardiovascular risk factors are also both influenced by sex [10,11]. Throughout the last decades, assessment of self-rated health has become increasingly important and is often used for healthcare surveillance and in policy making.

The aim of this study was to assess whether self-rated health is related to cardiovascular risk factors and disease in the general population from the Amazon Basin of Brazil. We hypothesized that higher self-rated health is associated with less cardiovascular risk factors and disease, and that these relationships are modified by sex [12].

## Methods

### Study site

The study was conducted in the municipality of Cruzeiro do Sul, Acre (Northern Brazil; Amazon Basin). The prevalence for cardiovascular disease in Acre (5,815 per 100,000 inhabitants) is below the average rate for Brazil (6,025 per 100,000 inhabitants) and [2] the region is considered to be one of the poorest in Brazil and has one of the lowest population densities [13].

### Patient and Public Involvement

Patients or the public were not involved in the study design, recruitment to and conduct of the study nor reporting of results. All patients were informed of the results from their own examinations conducted in the study.

Data will be made available upon reasonable request to the corresponding author.

### Sampling

This cross-sectional study was conducted as a part of the Malaria Heart Study (clinicaltrials.gov: NCT04445103). Participants from the general population were enrolled from June 2020 through December 2020. Through randomization, we selected 10 local healthcare clinics from Cruzeiro do Sul, equally distributed between rural and urban areas. Local healthcare agents provided lists of persons associated with each clinic from which a random sample was invited to participate in the study. We included persons  $\geq 18$  years old



1  
2  
3  
4 who completed the examination program and responded to all questionnaires. Exclusion  
5  
6  
7  
8 criteria were ongoing pregnancy, ongoing infection as assessed by examination of a  
9  
10  
11 medical doctor, and presence of *Plasmodium* in peripheral blood smears. A total of 504  
12  
13  
14 participants were included from healthcare clinics. A second group of 70 participants from  
15  
16  
17 the general population who had recently completed anti-malarial treatment, and for whom  
18  
19 the above-mentioned inclusion and exclusion criteria also applied, were included as well.  
20  
21  
22

### 23 24 **Data collection**

25  
26 Two different questionnaires were administered by trained interviewers. The first was the  
27  
28 EQ-5D-5L questionnaire which is validated in Brazilian Portuguese (study registration no.:  
29  
30 28276) [14]. For the purpose of this study, we used data from the EQ visual analogue  
31  
32 scale (EQ-VAS) which provides a single estimate of self-rated health ranging from 0 to 100  
33  
34 points on a continuous scale. Zero represents the worst possible self-rated health and 100  
35  
36 represents ideal health. The second questionnaire was used to gather information about  
37  
38 socioeconomic status, race, cardiovascular risk factors, known cardiac disease (prior  
39  
40 myocardial infarction and heart failure), and current medications. Race was self-reported,  
41  
42 and two persons did not answer this question. Afterwards, participants underwent a  
43  
44 physical examination to measure height, weight, and blood pressure. Fingertick point-of-  
45  
46 care blood draws were used to measure glucose levels and to obtain thick and thin blood  
47  
48 slides. Giemsa stained thick and thin blood slides were analyzed by two independent  
49  
50  
51  
52  
53  
54  
55  
56  
57  
58  
59  
60  
microscopists to detect *Plasmodium*.

### 58 **Cardiovascular risk factors**

1  
2  
3  
4 We assessed seven different cardiovascular risk factors. Hypertension was defined as a  
5  
6 physician diagnosis of hypertension or intake of anti-hypertensive medication,  
7  
8 hypercholesterolemia as a physician diagnosis of dyslipidemia or intake of lipid lowering  
9  
10 medication, and diabetes as a physician diagnosis of diabetes or fasting blood glucose  
11  
12 >126mg/dL [15]. Body mass index (BMI) was calculated as: body weight  
13  
14 (kilograms)/height<sup>2</sup> (meters), and obesity was defined as BMI  $\geq 30$ kg/m<sup>2</sup>. Participants were  
15  
16 classified as smokers if they were current smokers or had previously smoked. A healthy  
17  
18 diet was defined as intake of any quantity of vegetables with a main meal  $\geq 3$  times/week.  
19  
20  
21  
22  
23  
24  
25 Physical activity was defined as participation in any kind of physical activity during leisure  
26  
27  
28  
29 time. We did not apply any time limit or threshold.  
30  
31  
32  
33

### 34 **Biochemistry**

35  
36 Field procedures: During examinations, we collected peripheral venous blood samples in  
37  
38 citrate, EDTA, and serum-separator tubes, which were cooled at 2-8°C. Citrate plasma  
39  
40 was immediately separated by centrifugation (12 minutes, 3200 rpm) in a mobile  
41  
42 laboratory and transferred to Eppendorf tubes.  
43  
44

45  
46 Laboratory: Serum-separator tubes underwent centrifugation (10 min, 3000rpm) to extract  
47  
48 serum which was subsequently stored at -20°C in Eppendorf tubes. Laboratory analyses  
49  
50 were performed at Citolab and Centro de Diagnósticos, Cruzeiro do Sul, Acre, Brazil.  
51  
52 Using EDTA blood, a complete blood count with a differential was conducted (NX-350,  
53  
54 Sysmex, Japan; Citolab), and reticulocytes were counted manually (Citolab) [16]. Citrate  
55  
56 plasma was used to analyze coagulation parameters (Coagmaster 2.0, Wama  
57  
58  
59  
60

1  
2  
3  
4 Diagnóstica, Brazil; Citolab). Serum was used to measure creatinine, bilirubin, and C-  
5  
6 reactive protein (Cobas c111, Roche Diagnostics, Switzerland; Citolab and Centro de  
7  
8 Diagnósticos). Analyses of C-reactive protein were only available in a subset of  
9  
10 participants (n=436).  
11  
12  
13

## 14 15 **Echocardiography**

16  
17 A single medical doctor either performed or supervised all echocardiographic examinations  
18  
19 (PB). Quality control was conducted on a frequent basis in a central imaging laboratory  
20  
21 (PB). Quality control was conducted on a frequent basis in a central imaging laboratory  
22  
23 (Herlev-Gentofte Hospital, Denmark) by an investigator certified in echocardiography by  
24  
25 the European Association of Cardiovascular Imaging. Examinations were performed  
26  
27 bedside (Vivid-IQ, GE Healthcare, Norway), and images were stored offline for analysis in  
28  
29 EchoPAC BT13 (v. 203.82). Analyses were conducted by AW according to contemporary  
30  
31 guidelines [17]. Rheumatic heart disease was assessed by PB according to the World  
32  
33 Heart Federation criteria [18]. We assessed three categories of subclinical left ventricular  
34  
35 (LV) cardiac disease: (i) reduced contractile function defined as LV ejection fraction <45%,  
36  
37 (ii) LV hypertrophy defined as LV mass index >115g/m<sup>2</sup> for men and >95g/m<sup>2</sup> for women  
38  
39 and (iii) diastolic dysfunction determined according to existing guidelines [19].  
40  
41  
42

43  
44 Classification of diastolic dysfunction involves assessment of early and late mitral inflow  
45  
46 velocity, mitral annular early diastolic velocity, tricuspid regurgitation velocity and the left  
47  
48 atrial volume index. Additional details are described in Supplemental Data 'Methods'.  
49  
50  
51

## 52 53 **Ethics**

54  
55 The study was approved by the institutional review committee at Federal University of Acre  
56  
57 and University of São Paulo (CAAE: 26552619.6.0000.510 and 32947520.4.0000.5467),  
58  
59  
60

1  
2  
3  
4 local health care authorities and leaders of health care clinics. The study complies with the  
5  
6 2<sup>nd</sup> Declaration of Helsinki, and all patients provided written informed consent on oral and  
7  
8 written information given in Portuguese. Illiterate participants provided fingerprints instead  
9  
10 of signatures. For ethical reasons a medical doctor evaluated all participants on-site, and  
11  
12 in case of suspected heart disease participants were referred to a cardiologist.  
13  
14

15  
16 Data from the study is available upon reasonable request to the senior author. Patients or  
17  
18 the public were not involved in the study design or reporting of results.  
19  
20  
21

## 22 **Statistics**

23  
24  
25 Baseline characteristics for the study population were stratified according to tertiles of self-  
26  
27 rated health (cut-offs of 70 and 91 points) and sex. Due to the nature of the distribution,  
28  
29 tertiles of self-rated health did not contain equal amounts of participants. P for trend was  
30  
31 calculated using linear regression models and the Cuzick nonparametric test for trend [20].  
32  
33 Differences between groups were compared using the chi-square test, Student's *t*-test,  
34  
35 and the Wilcoxon rank-sum test, as appropriate. Histograms were conducted to display the  
36  
37 distribution of self-rated health. In all statistical tests, self-rated health was treated as a  
38  
39 continuous variable. Logistic regression models were conducted to examine the  
40  
41 relationship between self-rated health and cardiovascular risk factors and disease.  
42  
43 Multivariable models were adjusted for core variables: clinical data (age, sex, race),  
44  
45 socioeconomic data (work, family income, living area), known cardiac disease (prior  
46  
47 myocardial infarction, heart failure, rheumatic heart disease). In addition, all associations  
48  
49 with cardiovascular risk factors were mutually adjusted for all other risk factors.  
50  
51  
52 Interactions with sex were also examined. Family income was log-transformed to provide a  
53  
54 normal distribution. The relationship between self-rated health and (i) the sum of cardiac  
55  
56  
57  
58  
59  
60

1  
2  
3  
4 risk factors (hypertension, hypercholesterolemia, diabetes, obesity, smoking) and (ii)  
5  
6 echocardiographic parameters were assessed in linear regression models, which were  
7  
8 adjusted for the core variables. All analyses were conducted in Stata v.14.2 (StataCorp,  
9  
10 Texas, USA) and RStudio v.1.3 (R, Vienna, Austria). Two-sided P-values <0.05 were  
11  
12 considered statistically significant.  
13  
14  
15  
16  
17  
18  
19  
20  
21  
22  
23  
24  
25  
26  
27  
28  
29  
30  
31  
32  
33  
34  
35  
36  
37  
38  
39  
40  
41  
42  
43  
44  
45  
46  
47  
48  
49  
50  
51  
52  
53  
54  
55  
56  
57  
58  
59  
60

For peer review only

## Results

A total of 574 participants were assessed (mean age  $41 \pm 15$  years, 61% female). Mean self-rated health was  $75 \pm 21$  points (interquartile range 60 to 90 points) (Figure 1A). Four participants (<1%) reported 0 points, and 91 participants (16%) reported 100 points. The prevalences of cardiovascular risk factors were 20% for hypertension, 16% for hypercholesterolemia, 6% for diabetes, 23% for obesity, 38% for current or prior smoking, 52% for unhealthy diet, and 63% for absence of physical activity. Participants with lower self-rated health more frequently had all of the above risk factors and were older compared with participants with high self-rated health (P-trend<0.05; Table 1). No differences were observed in socioeconomic characteristics, biochemistry, or subclinical cardiac disease by echocardiography (reduced LV ejection fraction, hypertrophy, diastolic dysfunction) across tertiles of self-rated health (Table 1).

### Cardiovascular risk factors

In unadjusted logistic regression models, better self-rated health was significantly associated with lower odds of all cardiovascular risk factors (P<0.05 for all; Table 2). In adjusted models, self-rated health (per 10-point increase) was associated with lower odds of hypertension (OR 0.87 [95%CI 0.78 to 0.97], P=0.01), hypercholesterolemia (OR 0.89 [95%CI 0.80 to 0.99], P=0.04) and higher odds of healthy diet (OR 1.13 [95%CI 1.04 to 1.24], P=0.004). In multivariable models, better self-rated health was also associated with the sum of cardiovascular risk factors (beta = -0.07 per 10-point increase [95%CI -0.10 to -0.03], P<0.001).

### **Subclinical cardiac disease by echocardiography**

No significant associations were found between self-rated health (per 10-point increase) and subclinical cardiac disease by echocardiography: LV ejection fraction <45% (OR 0.88 [95%CI 0.73 to 1.08], P= 0.22), LV hypertrophy (OR 0.87 [95%CI 0.72 to 1.07], P=0.19) or diastolic dysfunction (OR 0.92 [95%CI 0.75 to 1.15], P=0.47) (Table 2). No individual echocardiographic parameters were significantly associated with self-rated health in multivariable models (P>0.05 for all; Table 3).

### **Interactions with sex**

Self-rated health was higher in men than in women (77 vs 73 points) but the difference was not statistically significant (P=0.09) (Figure 1B-C). In general, women had higher body mass index, lower income, less frequently smoked, and were more physically active compared with men (P<0.05 for all; Supplemental Table 1). Sex modified the associations with hypertension, smoking, healthy diet, and physical activity, but not cardiac disease by echocardiography (Table 2). Unadjusted associations with cardiovascular risk factors, stratified by sex, are presented in Figure 2. For men, higher self-rated health (per 10-point increase) yielded greater odds of a healthy diet (adjusted OR 1.33 [95%CI 1.12 to 1.59], P=0.002) and physical activity (adjusted OR 1.24 [95%CI 1.03 to 1.50], P=0.02). For women, higher self-rated health (per 10-point increase) was associated with lower odds of hypertension (adjusted OR 0.85 [95%CI 0.74 to 0.97], P=0.016), and hypercholesterolemia (adjusted OR 0.87 [95%CI 0.76 to 0.99], P=0.046).

## Discussion

This study has two principal findings. First, in a sample of the general population from the Amazon Basin, we found that self-rated health was significantly associated with cardiovascular risk factors and that these association were modified by sex. Second, self-rated health was not associated with cardiac disease assessed by echocardiography.

Self-rated health has previously been related to cardiovascular disease in various observational studies [21–23]. Higher self-rated health is related to a lower burden of cardiovascular risk factors (hypertension, hypercholesterolemia, diabetes, obesity), associations that persist after accounting for sociodemographic characteristics and baseline cardiac disease. Proposed mechanisms involve (i) chronic elevation of inflammatory cytokines ('immune-activated sickness') [24], (ii) an poorly balanced activation of the autonomous nervous system, and (iii) glucose levels [25]. Furthermore, self-rated health has been linked to subclinical cardiac alterations, e.g., elevated coronary artery calcium score [21], cardiac biomarkers [26], and reduced right ventricular function [27]. We found no associations with left or right ventricular echocardiographic parameters, possibly because our sample was derived from an overall healthy general population, participants were young (mean age 41 years), and echocardiographic alterations may possibly occur later in the cascade of cardiac pathology compared with elevated calcium scores and biomarkers.

Importantly, women had somewhat lower self-rated health than men, and the relationship with cardiovascular risk factors was further modified by sex. Both findings are in line with previously published data [28–30]. While the mechanisms for this remain unknown,



1  
2  
3  
4 women may be particularly sensitive to chronic health conditions, thus affecting self-rated  
5  
6 health [31]. Recent studies have demonstrated that the prevalence of cardiovascular  
7  
8 disease is higher in women, emphasizing that an appraisal of sex differences is necessary  
9  
10 to obtain maximum benefit of lifestyle interventions for the prevention of cardiac disease  
11  
12 [32].  
13  
14

15  
16  
17  
18 Throughout the last decades, quality of life has been used as a tool to measure outcome  
19  
20 of healthcare interventions and guide healthcare policy making. Although self-rated health  
21  
22 represents a generic measure that encompasses many dimensions of health, and as such,  
23  
24 has limited sensitivity to address specific health issues, it is considered a reliable measure  
25  
26 to compare health in different populations and to evaluate disease burden [33]. Because  
27  
28 classic risk tools for cardiovascular disease do not capture social determinants, it has even  
29  
30 been argued that self-rated health, in addition to classic risk factors, may be more useful  
31  
32 for cardiovascular risk prediction. The EQ-5D visual analogue scale constitutes a widely  
33  
34 used tool for this purpose [14]. In the Amazon Basin, the average self-rated health score  
35  
36 was 75 points, which is lower compared to other studies from Brazil, where average  
37  
38 scores of 78 to 84 points have been reported [10,34]. Notably, none of these studies were  
39  
40 conducted in Northern Brazil, and the assessed populations were younger than our  
41  
42 sample. In addition, differences in cultural, regional, and disease patterns may partake in  
43  
44 understanding this difference, and further explain why general life expectancy in the  
45  
46 Amazon Basin is below the national average in Brazil [35].  
47  
48  
49  
50

51  
52 Self-rated health relies on patient-centered care, which integrates the patient's  
53  
54 environment, values, and preferences, hence making it meaningful to the patient and the  
55  
56 treating clinician. It is a reproducible and consistent measure across different populations  
57  
58  
59  
60

1  
2  
3  
4 and geographical regions [33], and it may potentially complement well-established risk  
5  
6 scoring models for cardiovascular disease [36]. Because self-rated health is easily  
7  
8 obtained, it can help to facilitate risk assessment strategies. This is particularly important in  
9  
10 areas such as the Amazon Basin where access to healthcare is highly variable and often  
11  
12 limited. Considering the close relationship we found with several cardiovascular risk  
13  
14 factors, self-rated health could be obtained by non-medical personnel and enable  
15  
16 screening of remote communities. Consequently, selected individuals, i.e., persons with  
17  
18 low self-rated health and no known cardiovascular risk factors, could be referred for risk  
19  
20 factor optimization in healthcare facilities. Furthermore, it could be used as a measure for  
21  
22 the effect of primary healthcare prevention strategies, similar to what has been reported  
23  
24 previously [37]. Whether self-rated health is linked to clinical outcomes in the Amazon  
25  
26 Basin, and if improvement in self-rated health could improve prognosis, should be  
27  
28 explored in future studies.  
29  
30  
31  
32  
33  
34  
35

### 36 **Limitations**

37  
38 Socioeconomic status is associated with self-rated health and cardiovascular risk factors  
39  
40 [38,39], and despite our multivariable adjustment, residual confounding may still exist.  
41  
42 Health related behavior, including healthy diet and physical activity, was self-reported and  
43  
44 this could be associated with bias. We adjusted our models for cardiac disease at baseline  
45  
46 and in an attempt to limit reverse causation; however, some effect may persist. As no  
47  
48 standard data values of the EQ-5D-5L have been published in Brazil, we did not apply  
49  
50 data from the five dimensions of quality of life in this study, nor calculate index scores.  
51  
52 Reference values for the EQ-5D-3L [10] have been published, but cross-walk datasets are  
53  
54  
55  
56  
57  
58  
59  
60

1  
2  
3  
4 not available. To avoid the inclusion of white coat hypertension, we defined hypertension  
5  
6 based on prior physician diagnosis and/or intake of anti-hypertensive medication.  
7  
8  
9

## 10 **Conclusion**

11  
12  
13 Self-rated health was positively associated with a healthy lifestyle, and this relationship  
14  
15 was modified by sex. Conversely, self-rated health was not associated with cardiac  
16  
17 disease by echocardiography. Healthcare policies could potentially utilize self-rated health  
18  
19 for screening or as a target to improve health behavior.  
20  
21  
22

### 23 ***What is already known on this subject?***

24  
25  
26 Self-rated health is widely used as a health indicator in various populations and provides  
27  
28 prognostic information on mortality.  
29  
30  
31

### 32 ***What does this study add?***

33  
34  
35 In the Amazon basin self-rated health was significantly associated with cardiovascular risk  
36  
37 factors, but not with subclinical cardiac disease by echocardiography. Assessment of self-  
38  
39 rated health is easily obtained and could potentially be used to measure the effect of  
40  
41 lifestyle and healthcare interventions in areas with restricted access to healthcare.  
42  
43  
44  
45  
46  
47  
48  
49

## 50 **Acknowledgements**

51  
52  
53 We are thankful for the help and guidance from Dr. Suiane da Costa Negreiros do Valle  
54  
55 and Janaína Alencar.  
56  
57  
58  
59  
60

### Data availability statement

Data from the study is available upon reasonable request to the senior author. This involves de-identified participant data and statistical analyses and plans.

For peer review only

## Funding

### Funding specifically rewarded for the Malaria Heart Study:

PB and AEH: Jette and Hans Henrik Jensen (No. N/A), The Independent Research Fund Denmark (0129-0003B), Dansk Medicinsk Selskab København (120620-kms), Julie von Müllens Fond (No. N/A), Knud Højgaards Fond (18-05-2487), A. P. Møllers Lægefond (18-L-0026), Reinholdt W. Jorck og Hustrus Fond (18-JU-0485), Eva og Henry Frænkels Mindefond (NLA-080919), Astra Zeneca/Danish Society of Cardiology (No. N/A), Internal Funds at Herlev-Gentofte Hospital (No. N/A), Torben og Alice Frimodts Fond (TA250419), Brorsons Fond (12038-1-hh), Lundbeckfonden (R373-2021-1201).

AW: Danish Heart Association (20-R139-A9644-22165), William Demant (20-1257), Knud Højgaards Fond (20-01-1076), Reinholdt W. Jorck og Hustrus Fond (20-JU-0145).

MK: Novo Nordisk Fonden (NNF20OC0062782).

LCG: CNPq (142306/2020-7).

### Other sources of funding:

CRFM: FAPESP (2020/06747-4) and CNPq (302917/2019-5).

No sponsors had any role in the design, conduction or analysis of the study.

## Contributor statement

AEH: Conception of study, planning and design, funding, data acquisition, data analysis, statistics, writing, critical review.

1  
2  
3  
4 LCG: Data acquisition, planning  
5  
6

7 LOM: Data acquisition  
8  
9

10 AW: Data acquisition, data analysis, critical review  
11  
12

13 KOL: Data acquisition  
14  
15

16 MDK: Data analysis, critical review  
17  
18

19 MP: Critical review  
20  
21

22 IVMV: Data acquisition  
23  
24

25 RMS: Expert advice  
26  
27

28 FJO: Critical review  
29  
30

31 CRF: Expert advice  
32  
33

34 TBS: Conception of study  
35  
36

37 OMS: Conception of study  
38  
39

40  
41 PB (responsible for the overall content as guarantor): Conception of study, planning and  
42 design, funding, data acquisition, data analysis, statistics, writing, critical review.  
43  
44  
45  
46  
47  
48

### 49 **Ethics approval statement**

50  
51  
52  
53 This study involves human participants and was approved by an Ethics Committee. Ethics  
54 committee at Federal University of Acre and University of São Paulo (CAAE:  
55 26552619.6.0000.510 and 32947520.4.0000.5467)  
56  
57  
58  
59  
60

1  
2  
3  
4  
5  
6  
7  
8  
9  
10  
11  
12  
13  
14  
15  
16  
17  
18  
19  
20  
21  
22  
23  
24  
25  
26  
27  
28  
29  
30  
31  
32  
33  
34  
35  
36  
37  
38  
39  
40  
41  
42  
43  
44  
45  
46  
47  
48  
49  
50  
51  
52  
53  
54  
55  
56  
57  
58  
59  
60

### Disclosures

The authors report no conflicts of interest.

For peer review only

## References

1. Ribeiro, A.L.P.; Duncan, B.B.; Brant, L.C.C.; Lotufo, P.A.; Mill, J.G.; Barreto, S.M. Cardiovascular Health in Brazil Trends and Perspectives. *Circulation* **2016**, *133*, 422–433, doi:10.1161/CIRCULATIONAHA.114.008727.
2. Oliveira, G.M.M.; Brant, L.C.C.; Polanczyk, C.A.; Biolo, A.; Nascimento, B.R.; Malta, D.C.; Souza, M.F.M.; Soares, G.P.; Junior, G.F.X.; Machline-Carrion, M.J.; et al. Cardiovascular Statistics – Brazil 2020. *Arq Bras Cardiol* **2020**, *115*, 308–439.
3. Ribeiro, A.L.P.; Duncan, B.B.; Brant, L.C.C.; Lotufo, P.A.; Mill, J.G.; Barreto, S.M. Cardiovascular Health in Brazil Trends and Perspectives. *Circulation* **2016**, *133*, 422–433, doi:10.1161/CIRCULATIONAHA.114.008727.
4. Chor, D.; Pinho Ribeiro, A.L.; Sá Carvalho, M.; Duncan, B.B.; Andrade Lotufo, P.; Araújo Nobre, A.; De Aquino, E.M.L.L.; Schmidt, M.I.; Griep, R.H.; Molina, M.D.C.B.; et al. Prevalence, awareness, treatment and influence of socioeconomic variables on control of high blood pressure: Results of the ELSA-Brasil study. *PLoS One* **2015**, *10*, 1–14, doi:10.1371/journal.pone.0127382.
5. Ministério da Saúde *Vigitel Brasil 2019; 2020*; ISBN 9788533427655.
6. Hosseinpoor, A.R.; Stewart Williams, J.; Amin, A.; Araujo de Carvalho, I.; Beard, J.; Boerma, T.; Kowal, P.; Naidoo, N.; Chatterji, S. Social determinants of self-reported health in women and men: Understanding the role of gender in population health. *PLoS One* **2012**, *7*, doi:10.1371/journal.pone.0034799.
7. van der Linde, R.M.; Mavaddat, N.; Luben, R.; Brayne, C.; Simmons, R.K.; Khaw, K.T.; Kinmonth, A.L. Self-Rated Health and Cardiovascular Disease Incidence: Results from a Longitudinal Population-Based Cohort in Norfolk, UK. *PLoS One* **2013**, *8*, 2–9, doi:10.1371/journal.pone.0065290.



1  
2  
3  
4  
5  
6  
7  
8  
9  
10  
11  
12  
13  
14  
15  
16  
17  
18  
19  
20  
21  
22  
23  
24  
25  
26  
27  
28  
29  
30  
31  
32  
33  
34  
35  
36  
37  
38  
39  
40  
41  
42  
43  
44  
45  
46  
47  
48  
49  
50  
51  
52  
53  
54  
55  
56  
57  
58  
59  
60

8. Møller, L.; Kristensen, T.S.; Hollnagel, H. Self rated health as a predictor of coronary heart disease in Copenhagen, Denmark. *J Epidemiol Community Health* **1996**, *50*, 423–428, doi:10.1136/jech.50.4.423.
9. Idler, E.L.; Benyamini, Y. Self-Rated Health and Mortality: A Review of Twenty-Seven Community Studies. *J Health Soc Behav* **1997**, *38*, 21–37, doi:10.2307/2955359.
10. Santos, M.; Monteiro, A.L.; Santos, B. EQ-5D Brazilian population norms. *Health Qual Life Outcomes* **2021**, *19*, 1–7, doi:10.1186/s12955-021-01671-6.
11. Gonçalves, R.P.F.; Haikal, D.S.; Freitas, M.I. de F.; Machado, Í.E.; Malta, D.C. Self-reported medical diagnosis of heart disease and associated risk factors: National health survey. *Rev Bras Epidemiol* **2019**, *22*, doi:10.1590/1980-549720190016.supl.2.
12. Boerma, T.; Hosseinpoor, A.R.; Verdes, E.; Chatterji, S. A global assessment of the gender gap in self-reported health with survey data from 59 countries. *BMC Public Health* **2016**, *16*, 1–9, doi:10.1186/s12889-016-3352-y.
13. Paim, J.; Travassos, C.; Almeida, C.; Bahia, L.; MacInko, J. The Brazilian health system: History, advances, and challenges. *Lancet* **2011**, *377*, 1778–1797, doi:10.1016/S0140-6736(11)60054-8.
14. EuroQol EQ-5D-5L questionnaire in Brazilian Portuguese Available online: <https://euroqol.org/eq-5d-instruments/> (accessed on Jul 13, 2021).
15. American Diabetes Association 2 . Classification and Diagnosis of Diabetes: Standards of Medical Care in Diabetes, 2020. *Diabetes Care* **2020**, *43*, 14–31, doi:10.2337/dc20-S002.
16. Simionatto, M.; De Paula, J.P.; Chaves, M.A.F.; Bortoloso, M.; Cicchetti, D.; Leonart,

- 1  
2  
3  
4 M.S.S.; Do Nascimento, A.J. Manual and automated reticulocyte counts.  
5  
6 *Hematology* **2010**, *15*, 406–409, doi:10.1179/102453310X12647083621128.  
7  
8  
9 17. Lang, R.M.; Badano, L.P.; Mor-Avi, V.; Afilalo, J.; Armstrong, A.; Ernande, L.;  
10  
11 Flachskampf, F.A.; Foster, E.; Goldstein, S.A.; Kuznetsova, T.; et al.  
12  
13 Recommendations for cardiac chamber quantification by echocardiography in adults:  
14  
15 An update from the American Society of Echocardiography and the European  
16  
17 Association of Cardiovascular Imaging. *J Am Soc Echocardiogr* **2015**, *28*, 1-39.e14,  
18  
19 doi:10.1016/j.echo.2014.10.003.  
20  
21  
22 18. Reméanyi, B.; Wilson, N.; Steer, A.; Ferreira, B.; Kado, J.; Kumar, K.; Lawrenson, J.;  
23  
24 Maguire, G.; Marijon, E.; Mirabel, M.; et al. World Heart Federation criteria for  
25  
26 echocardiographic diagnosis of rheumatic heart disease-an evidence-based  
27  
28 guideline. *Nat Rev Cardiol* **2012**, *9*, 297–309, doi:10.1038/nrcardio.2012.7.  
29  
30  
31 19. Nagueh, S.F.; Smiseth, O.A.; Appleton, C.P.; Byrd, B.F.; Dokainish, H.; Edvardsen,  
32  
33 T.; Flachskampf, F.A.; Gillebert, T.C.; Klein, A.L.; Lancellotti, P.; et al.  
34  
35 Recommendations for the evaluation of left ventricular diastolic function by  
36  
37 echocardiography: An update from the American society of echocardiography and  
38  
39 the European association of cardiovascular imaging. *Eur Heart J Cardiovasc*  
40  
41 *Imaging* **2016**, *17*, 1321–1360, doi:10.1093/ehjci/jew082.  
42  
43  
44 20. Cuzick, J. A wilcoxon-type test for trend. *Stat Med* **1985**, *4*, 87–90,  
45  
46 doi:10.1002/sim.4780040112.  
47  
48  
49 21. Orimoloye, O.A.; Mirbolouk, M.; Uddin, S.M.I.; Dardari, Z.A.; Miedema, M.D.; Al-  
50  
51 Mallah, M.H.; Yeboah, J.; Blankstein, R.; Nasir, K.; Blaha, M.J. Association between  
52  
53 Self-rated Health, Coronary Artery Calcium Scores, and Atherosclerotic  
54  
55 Cardiovascular Disease Risk: The Multi-Ethnic Study of Atherosclerosis (MESA).  
56  
57  
58  
59  
60

1  
2  
3  
4  
5  
6  
7  
8  
9  
10  
11  
12  
13  
14  
15  
16  
17  
18  
19  
20  
21  
22  
23  
24  
25  
26  
27  
28  
29  
30  
31  
32  
33  
34  
35  
36  
37  
38  
39  
40  
41  
42  
43  
44  
45  
46  
47  
48  
49  
50  
51  
52  
53  
54  
55  
56  
57  
58  
59  
60

*JAMA Netw Open* **2019**, *2*, 1–11, doi:10.1001/jamanetworkopen.2018.8023.

22. Dong, W.; Pan, X.F.; Yu, C.; Lv, J.; Guo, Y.; Bian, Z.; Yang, L.; Chen, Y.; Wu, T.; Chen, Z.; et al. Self-Rated Health Status and Risk of Ischemic Heart Disease in the China Kadoorie Biobank Study: A Population-Based Cohort Study. *J Am Heart Assoc* **2017**, *6*, doi:10.1161/JAHA.117.006595.
23. Korhonen, P.E.; Kautiainen, H.; Mäntyselkä, P. Screening for cardiovascular risk factors and self-rated health in a community setting: A cross-sectional study in Finland. *Br J Gen Pract* **2014**, *64*, e611–e615, doi:10.3399/bjgp14X681769.
24. Lekander, M.; Elofsson, S.; Neve, I.M.; Hansson, L.O.; Uden, A.L. Self-rated health is related to levels of circulating cytokines. *Psychosom Med* **2004**, *66*, 559–563, doi:10.1097/01.psy.0000130491.95823.94.
25. Jarczok, M.N.; Kleber, M.E.; Koenig, J.; Loerbroks, A.; Herr, R.M.; Hoffmann, K.; Fischer, J.E.; Benyamini, Y.; Thayer, J.F. Investigating the associations of self-rated health: Heart rate variability is more strongly associated than inflammatory and other frequently used biomarkers in a cross sectional occupational sample. *PLoS One* **2015**, *10*, 1–19, doi:10.1371/journal.pone.0117196.
26. Kananen, L.; Enroth, L.; Raitanen, J.; Jylhävä, J.; Bürkle, A.; Moreno-Villanueva, M.; Bernhardt, J.; Toussaint, O.; Grubeck-Loebenstein, B.; Malavolta, M.; et al. Self-rated health in individuals with and without disease is associated with multiple biomarkers representing multiple biological domains. *Sci Rep* **2021**, *11*, 1–14, doi:10.1038/s41598-021-85668-7.
27. Liu, Y.-T.; Lai, J.-Z.; Zhai, F.-F.; Han, F.; Zhou, L.-X.; Ni, J.; Yao, M.; Tian, Z.; Zhu, Y.-L.; Chen, W.; et al. Right ventricular systolic function is associated with health-related quality of life: a cross-sectional study in community-dwelling populations. *Ann*

- 1  
2  
3  
4 *Transl Med* **2021**, *9*, 640–640, doi:10.21037/atm-20-6845.
- 5  
6  
7 28. Rutledge, T.; Linke, S.E.; Johnson, B.D.; Bittner, V.; Krantz, D.S.; Whittaker, K.S.;  
8  
9 Eastwood, J.A.; Eteiba, W.; Cornell, C.E.; Pepine, C.J.; et al. Self-rated versus  
10  
11 objective health indicators as predictors of major cardiovascular events: The NHLBI-  
12  
13 sponsored women’s ischemia syndrome evaluation. *Psychosom Med* **2010**, *72*,  
14  
15 549–555, doi:10.1097/PSY.0b013e3181dc0259.
- 16  
17  
18 29. de Mendonça Freire, L.; Dalamaria, T.; de Aquino Cunha, M.; de Souza, O.F. Self-  
19  
20 Rated Health in University Students from Rio Branco in the Western Brazilian  
21  
22 Amazon. *Health (Irvine Calif)* **2014**, *06*, 2245–2249,  
23  
24 doi:10.4236/health.2014.616260.
- 25  
26  
27 30. Schmidt, M. Predictors of self-rated health and lifestyle behaviours in Swedish  
28  
29 university students. *Glob J Health Sci* **2012**, *4*, 1–14, doi:10.5539/gjhs.v4n4p1.
- 30  
31  
32 31. Shadbolt, B. Some Correlates of Self-Rated Health. *Am J Public Health* **1997**, *87*,  
33  
34 951–960.
- 35  
36  
37 32. Appelman, Y.; van Rijn, B.B.; ten Haaf, M.E.; Boersma, E.; Peters, S.A.E. Sex  
38  
39 differences in cardiovascular risk factors and disease prevention. *Atherosclerosis*  
40  
41 **2014**, *241*, 211–218, doi:10.1016/j.atherosclerosis.2015.01.027.
- 42  
43  
44 33. Salomon, J.A.; Tandon, A.; Murray, C.J.L. Comparability of self rated health: cross  
45  
46 sectional multi-country survey using anchoring vignettes.,  
47  
48 doi:10.1136/bmj.37963.691632.44.
- 49  
50  
51 34. Menezes, R. de M.; Andrade, M.V.; Noronha, K.V.M. de S.; Kind, P. EQ-5D-3L as a  
52  
53 health measure of Brazilian adult population. *Qual Life Res* **2015**, *24*, 2761–2776,  
54  
55 doi:10.1007/s11136-015-0994-7.
- 56  
57  
58 35. Marinho, F.; de Azeredo Passos, V.M.; Carvalho Malta, D.; Barboza França, E.;
- 59  
60

1  
2  
3  
4  
5  
6  
7  
8  
9  
10  
11  
12  
13  
14  
15  
16  
17  
18  
19  
20  
21  
22  
23  
24  
25  
26  
27  
28  
29  
30  
31  
32  
33  
34  
35  
36  
37  
38  
39  
40  
41  
42  
43  
44  
45  
46  
47  
48  
49  
50  
51  
52  
53  
54  
55  
56  
57  
58  
59  
60

Abreu, D.M.X.; Araújo, V.E.M.; Bustamante-Teixeira, M.T.; Camargos, P.A.M.; da Cunha, C.C.; Duncan, B.B.; et al. Burden of disease in Brazil, 1990–2016: a systematic subnational analysis for the Global Burden of Disease Study 2016.

*Lancet* **2018**, *392*, 760–775, doi:10.1016/S0140-6736(18)31221-2.

36. May, M.; Lawlor, D.A.; Brindle, P.; Patel, R.; May, M. Cardiovascular disease risk assessment in older women: can we improve on Framingham? British Women's Heart and Health prospective cohort study. **2006**, doi:10.1136/hrt.2005.085381.

37. Denman, C.A.; Bell, M.L.; Cornejo, E.; De Zapien, J.G.; Carvajal, S.; Rosales, C. Changes in health behaviors and self-rated health of participants in Meta Salud: A primary prevention intervention of NCD in Mexico. *Glob Heart* **2015**, *10*, 55–61, doi:10.1016/j.gheart.2014.12.007.

38. McFadden Robert Luben AE Nicholas Wareham AE Sheila Bingham AE Kay-Tee Khaw, E.A. Occupational social class, risk factors and cardiovascular disease incidence in men and women: a prospective study in the European Prospective Investigation of Cancer and Nutrition in Norfolk (EPIC-Norfolk) cohort., doi:10.1007/s10654-008-9262-2.

39. Kaplan, G.A.; Keil, J.E. *AHA Medical/Scientific Statement Special Report Socioeconomic Factors and Cardiovascular Disease: A Review of the Literature Cardiovascular Disease and Its Risk Factors*;

1  
2  
3  
4 **Figure legends**  
5  
6  
7

8  
9 **Figure 1A-C**  
10

11 Title: Histograms of self-rated health

12  
13 Legend: Distribution of self-rated health in the (A) entire study population (n=574), (B) in  
14 men (n=224) and (C) in women (n=350).  
15  
16  
17

18  
19  
20 **Figure 2.**  
21

22 Title: Forest plot

23  
24 Legend: Association between self-rated health (per 10 point increase) and cardiovascular  
25 risk factors stratified by sex.  
26  
27  
28  
29  
30  
31  
32  
33  
34  
35  
36  
37  
38  
39  
40  
41  
42  
43  
44  
45  
46  
47  
48  
49  
50  
51  
52  
53  
54  
55  
56  
57  
58  
59  
60

**Table 1.** Baseline clinical characteristics by tertiles of self-rated health

|                             | Tertiles of self-rated health   |                                 |                                 | P trend |
|-----------------------------|---------------------------------|---------------------------------|---------------------------------|---------|
|                             | 1 <sup>st</sup> tertile (n=231) | 2 <sup>nd</sup> tertile (n=226) | 3 <sup>rd</sup> tertile (n=117) |         |
|                             | 0 to 70                         | 71 to 90                        | 91 to 100                       |         |
| <b>Baseline</b>             |                                 |                                 |                                 |         |
| Age, years                  | 46 ± 16                         | 38 ± 13                         | 39 ± 15                         | <0.001  |
| Female, %                   | 154 (67%)                       | 127 (56%)                       | 69 (59%)                        | 0.06    |
| Self-reported race, %       |                                 |                                 |                                 | 0.51    |
| White                       | 33 (14%)                        | 24 (11%)                        | 20 (17%)                        |         |
| Mixed                       | 163 (71%)                       | 175 (77%)                       | 77 (66%)                        |         |
| Black                       | 32 (14%)                        | 26 (12%)                        | 18 (15%)                        |         |
| Indigenous                  | 2 (1%)                          | 1 (<1%)                         | 1 (1%)                          |         |
| BMI, kg/m <sup>2</sup>      | 28 ± 6                          | 27 ± 5                          | 26 ± 4                          | 0.002   |
| Abdominal circumference, cm | 90 ± 14                         | 87 ± 12                         | 84 ± 11                         | <0.001  |
| Asthma                      | 11 (5%)                         | 8 (4%)                          | 2 (2%)                          | 0.36    |
| COPD, %                     | 3 (1%)                          | 3 (1%)                          | 1 (1%)                          | 0.92    |
| History of MI, %            | 2 (1%)                          | 2 (1%)                          | 1 (1%)                          | 1.00    |
| Heart failure, %            | 3 (1%)                          | 2 (1%)                          | 0 (0%)                          | 0.47    |
| Rheumatic heart disease, %  | 7 (3%)                          | 7 (3%)                          | 4 (3%)                          | 0.97    |
| SBP, mmHg                   | 134 ± 20                        | 131 ± 20                        | 131 ± 19                        | 0.29    |
| DBP, mmHg                   | 83 ± 12                         | 81 ± 11                         | 82 ± 12                         | 0.17    |
| <b>Risk factors</b>         |                                 |                                 |                                 |         |
| Hypertension, %             | 66 (29%)                        | 32 (14%)                        | 14 (12%)                        | <0.001  |
| Hypercholesterolemia, %     | 52 (23%)                        | 23 (10%)                        | 14 (12%)                        | <0.001  |
| Diabetes, %                 | 21 (9%)                         | 6 (3%)                          | 6 (5%)                          | 0.012   |
| Obesity, %                  | 68 (29%)                        | 45 (20%)                        | 20 (17%)                        | 0.012   |
| Smoking, %                  | 106 (46%)                       | 65 (29%)                        | 46 (39%)                        | <0.001  |
| Healthy diet, %             | 87 (38%)                        | 130 (58%)                       | 59 (50%)                        | <0.001  |

|                                 |                  |                   |                  |        |
|---------------------------------|------------------|-------------------|------------------|--------|
| Physical activity, %            | 64 (28%)         | 94 (42%)          | 53 (45%)         | <0.001 |
| <b>Socioeconomic status</b>     |                  |                   |                  |        |
| Work status, %                  |                  |                   |                  | 0.09   |
| Employed                        | 77 (33%)         | 98 (43%)          | 53 (45%)         |        |
| Self-employed                   | 20 (9%)          | 23 (10%)          | 9 (8%)           |        |
| Other                           | 134 (58%)        | 105 (47%)         | 55 (47%)         |        |
| Family income, BRL              | 1250 [800, 2000] | 1500 [1000, 3000] | 1200 [800, 2000] | 0.11   |
| Rural living area, %            | 92 (40%)         | 78 (35%)          | 55 (47%)         | 0.08   |
| <b>Biochemistry</b>             |                  |                   |                  |        |
| Blood sugar, mg/dL              | 110 ± 74         | 100 ± 27          | 110 ± 49         | 0.10   |
| Bilirubin, mg/dL                | 0.40 ± 0.28      | 0.41 ± 0.24       | 0.41 ± 0.26      | 0.90   |
| Platelets, mm <sup>3</sup>      | 229 ± 76         | 240 ± 67          | 234 ± 66         | 0.28   |
| Leukocytes, mm <sup>3</sup>     | 6349 ± 1991      | 6383 ± 1723       | 6532 ± 1915      | 0.68   |
| Reticulocytes, %                | 0.75 ± 0.19      | 0.80 ± 0.22       | 0.77 ± 0.22      | 0.44   |
| Hemoglobin, g/dL                | 14 ± 1           | 14 ± 1            | 14 ± 1           | 0.13   |
| C-reactive protein, mg/L        | 2.1 ± 8          | 3.1 ± 12          | 3.6 ± 12         | 0.44   |
| Creatinine, mg/dL               | 0.9 [0.7, 1.0]   | 0.9 [0.7, 1.0]    | 0.8 [0.7, 1.0]   | 0.73   |
| INR                             | 1.02 ± 0.12      | 1.01 ± 0.10       | 1.02 ± 0.10      | 0.30   |
| <b>Echocardiography</b>         |                  |                   |                  |        |
| LV ejection fraction <45%, %    | 9 (4%)           | 6 (3%)            | 3 (3%)           | 0.69   |
| LV hypertrophy, %               | 9 (4%)           | 4 (2%)            | 4 (3%)           | 0.39   |
| Diastolic dysfunction, %        | 7 (3%)           | 5 (2%)            | 1 (1%)           | 0.43   |
| LV ejection fraction, %         | 57 ± 6           | 57 ± 5            | 58 ± 5           | 0.48   |
| LV mass index, g/m <sup>2</sup> | 71 ± 18          | 68 ± 17           | 70 ± 16          | 0.11   |
| E/e'                            | 7.3 ± 2.6        | 6.7 ± 2.1         | 6.9 ± 2.3        | 0.014  |
| E/A                             | 1.2 ± 0.5        | 1.3 ± 0.4         | 1.3 ± 0.4        | 0.003  |



|                                             |           |           |           |       |
|---------------------------------------------|-----------|-----------|-----------|-------|
| Left atrial volume index, mL/m <sup>2</sup> | 20 ± 6    | 19 ± 5    | 19 ± 4    | 0.025 |
| TR velocity, m/s                            | 2.3 ± 0.3 | 2.3 ± 0.3 | 2.3 ± 0.2 | 0.34  |

COPD: chronic obstructive pulmonary disease, SBP: systolic blood pressure, DBP: diastolic blood pressure, BMI: body mass index, INR: international normalized ratio, LV: left ventricular, TR: tricuspid regurgitation

For peer review only

**Table 2.**

Association between self-rated health (per 10 increase), cardiovascular risk factors and disease in the entire population (n=574)

|                                    | Unadjusted<br>odds ratio [95%CI] | P      | Adjusted<br>odds ratio [95%CI]* | P     | P<br>interaction<br>sex |
|------------------------------------|----------------------------------|--------|---------------------------------|-------|-------------------------|
| <b>Risk factors</b>                |                                  |        |                                 |       |                         |
| Hypertension                       | 0.77 [0.71 to 0.85]              | <0.001 | 0.87 [0.78 to 0.97]             | 0.011 | 0.005                   |
| Hypercholesterolemia               | 0.83 [0.75 to 0.91]              | <0.001 | 0.89 [0.80 to 0.99]             | 0.044 | 0.29                    |
| Diabetes                           | 0.84 [0.73 to 0.97]              | 0.021  | 1.02 [0.86 to 1.22]             | 0.80  | 0.17                    |
| Obesity                            | 0.90 [0.82 to 0.98]              | 0.017  | 0.95 [0.86 to 1.05]             | 0.30  | 0.78                    |
| Smoking                            | 0.86 [0.79 to 0.93]              | <0.001 | 0.96 [0.87 to 1.05]             | 0.39  | 0.003                   |
| Heathy diet                        | 1.11 [1.03 to 1.20]              | 0.008  | 1.13 [1.04 to 1.24]             | 0.004 | 0.002                   |
| Physical activity                  | 1.16 [1.06 to 1.26]              | 0.001  | 1.09 [0.99 to 1.20]             | 0.079 | <0.001                  |
| <b>Subclinical cardiac disease</b> |                                  |        |                                 |       |                         |
| LV ejection fraction <45%          | 0.88 [0.73 to 1.08]              | 0.22   | 0.97 [0.77 to 1.23]             | 0.82  | 0.88                    |
| LV hypertrophy                     | 0.87 [0.72 to 1.07]              | 0.19   | 0.97 [0.76 to 1.24]             | 0.81  | 0.31                    |
| Diastolic dysfunction              | 0.92 [0.75 to 1.15]              | 0.47   | 1.09 [0.85 to 1.40]             | 0.51  | 0.63                    |

\*Multivariable models were mutually adjusted other cardiovascular risk factors in addition to age, sex, work, family income, living area (rural/urban) and prior heart disease  
LV: left ventricular

**Table 3.**

Self-rated health (per 10 point increase) and echocardiographic parameters in the entire population (n=574)

|                                    | Unadjusted<br>beta [95%CI] | P      | Adjusted<br>beta [95%CI]* | P    |
|------------------------------------|----------------------------|--------|---------------------------|------|
| <b>Echocardiography</b>            |                            |        |                           |      |
| Left ventricular ejection fraction | 0.04 [-0.16 to 0.25]       | 0.67   | 0.04 [-0.17 to 0.25]      | 0.71 |
| Left ventricular mass index        | -0.46 [-1.12 to 0.21]      | 0.18   | 0.12 [-0.46 to 0.70]      | 0.69 |
| e'                                 | 0.40 [0.25 to 0.54]        | <0.001 | 0.06 [-0.04 to 0.15]      | 0.23 |
| E/e'                               | -0.16 [-0.25 to -0.07]     | 0.001  | 0.01 [-0.07 to 0.09]      | 0.76 |
| E/A                                | 0.03 [0.02 to 0.05]        | <0.001 | 0.01 [-0.01 to 0.01]      | 0.99 |
| Left atrial volume index           | -0.26 [-0.46 to -0.06]     | 0.012  | -0.05 [-0.22 to 0.13]     | 0.61 |
| Tricuspid regurgitation velocity   | -0.01 [-0.02 to -0.01]     | 0.21   | 0.01 [-0.01 to 0.1]       | 0.95 |

\*Multivariable models were adjusted for age, sex, work, family income, living area (rural/urban) and prior heart disease

e': mitral annular early diastolic velocity, E: early mitral inflow velocity, A; late mitral inflow velocity

**Figure 1A-C**

(A)

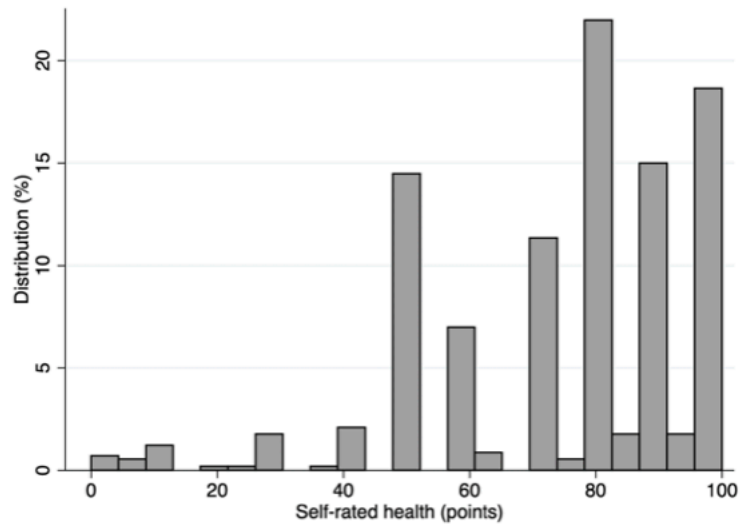

(B)

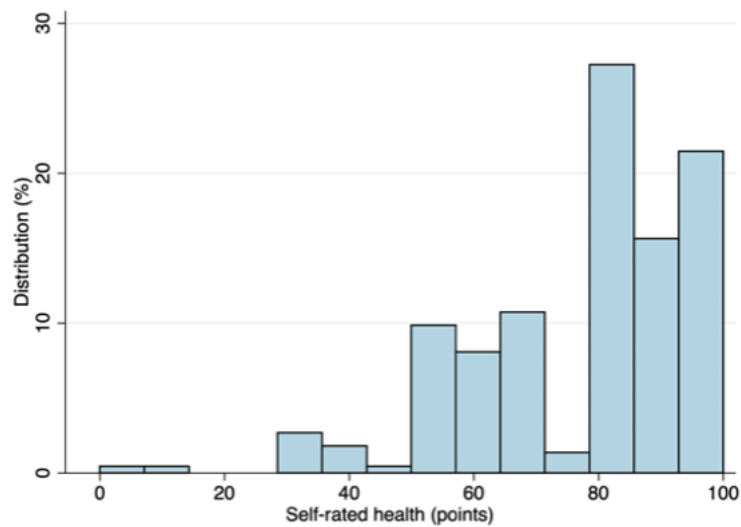

(C)

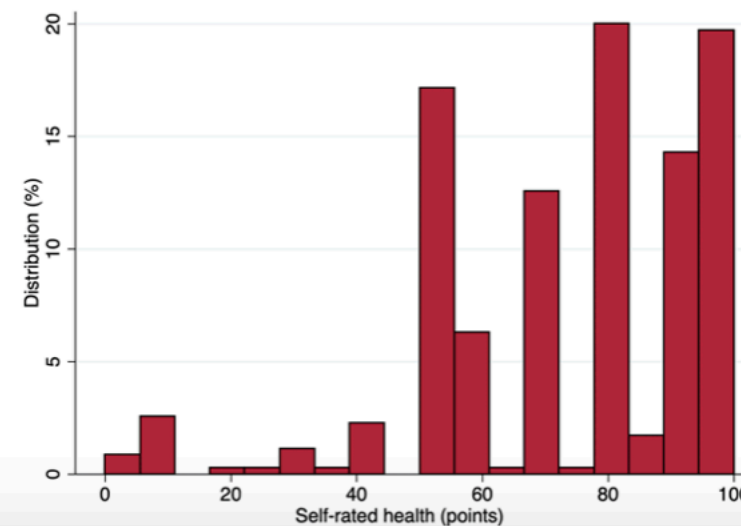

**Figure 2.**

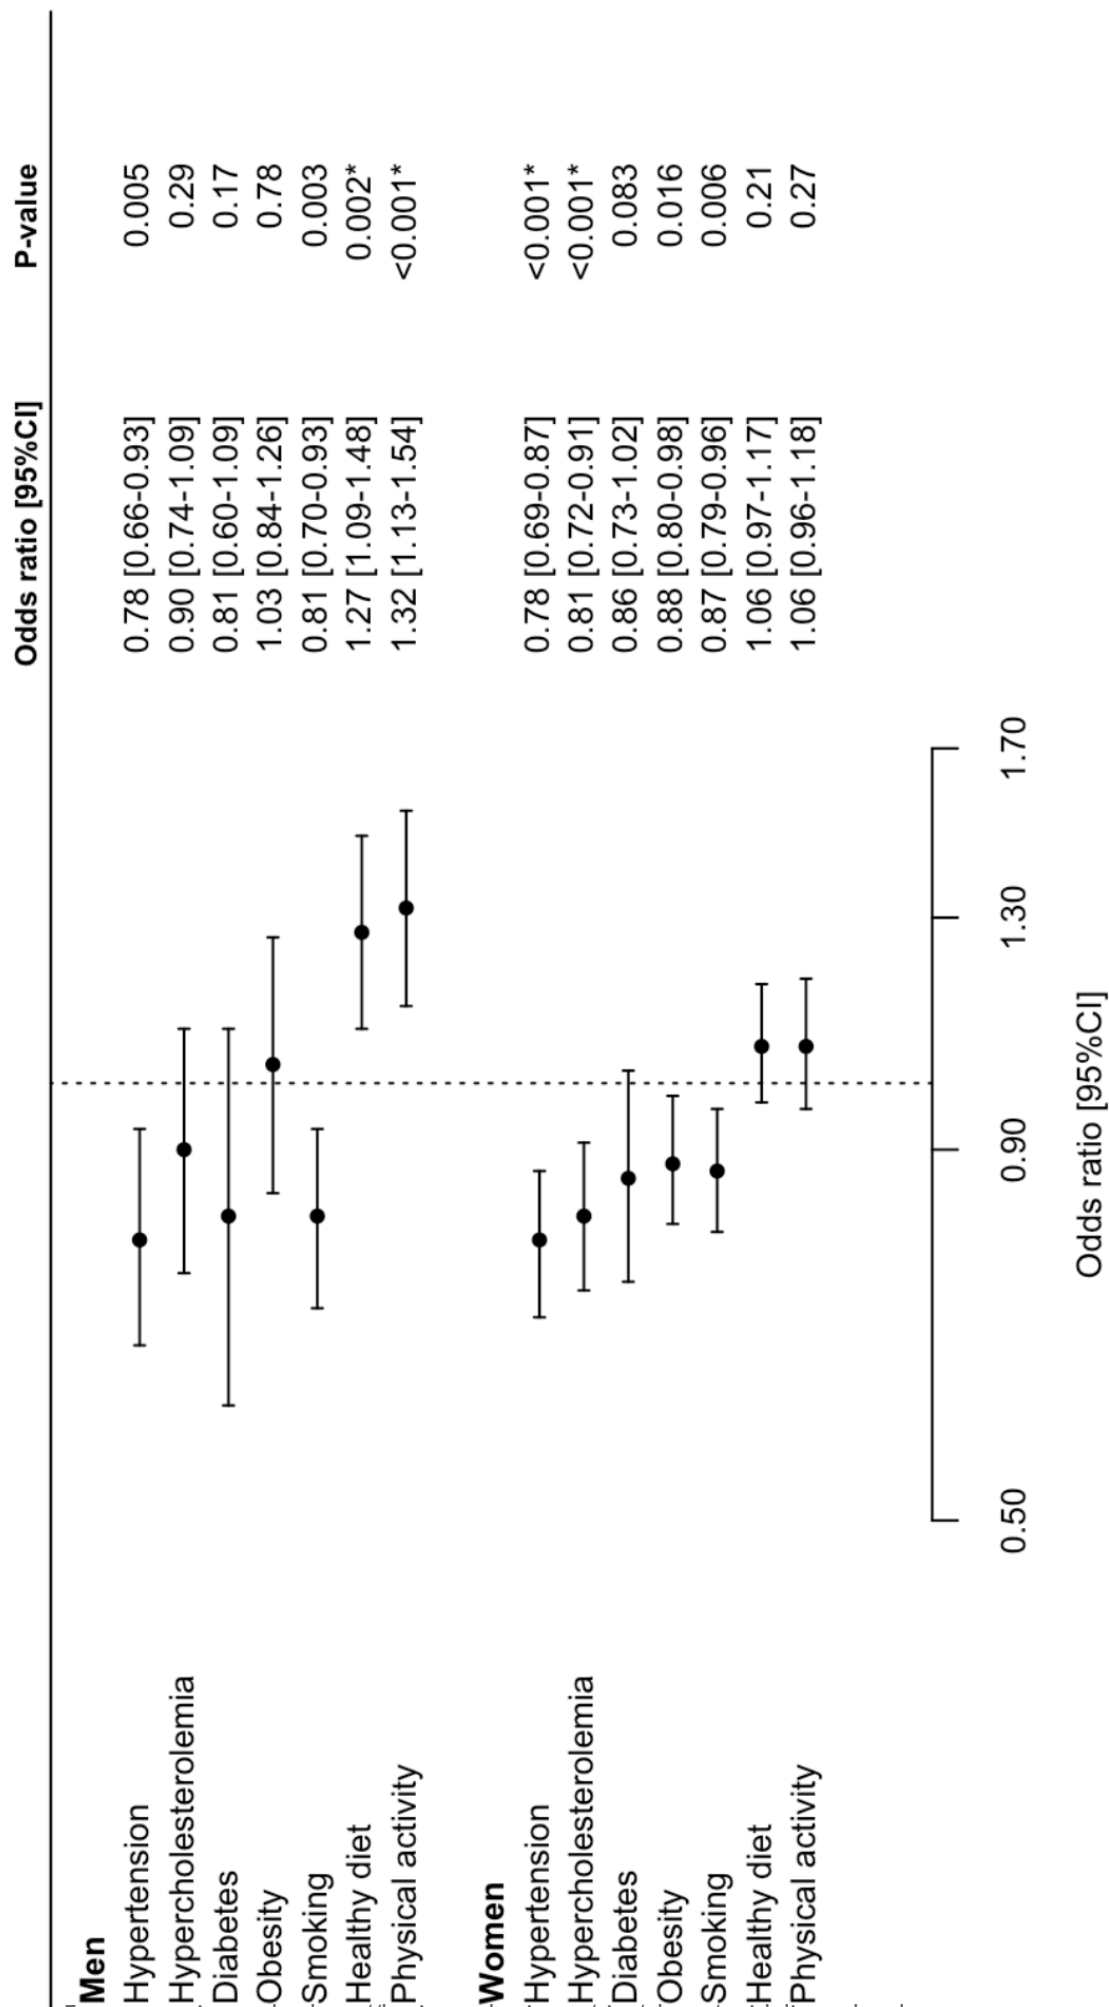

# BMJ Open

## Is self-rated health associated with cardiovascular risk factors and disease in a low-income setting? A cross-sectional study from the Amazon Basin of Brazil

|                                 |                                                                                                                                                                                                                                                                                                                                                                                                                                                                                                                                                                                                                                                                                                                                                                                                                                                                                                                                                                                                                                                                                                                                                                                                                                                                                                                                                                                                                                                                                                                                 |
|---------------------------------|---------------------------------------------------------------------------------------------------------------------------------------------------------------------------------------------------------------------------------------------------------------------------------------------------------------------------------------------------------------------------------------------------------------------------------------------------------------------------------------------------------------------------------------------------------------------------------------------------------------------------------------------------------------------------------------------------------------------------------------------------------------------------------------------------------------------------------------------------------------------------------------------------------------------------------------------------------------------------------------------------------------------------------------------------------------------------------------------------------------------------------------------------------------------------------------------------------------------------------------------------------------------------------------------------------------------------------------------------------------------------------------------------------------------------------------------------------------------------------------------------------------------------------|
| Journal:                        | <i>BMJ Open</i>                                                                                                                                                                                                                                                                                                                                                                                                                                                                                                                                                                                                                                                                                                                                                                                                                                                                                                                                                                                                                                                                                                                                                                                                                                                                                                                                                                                                                                                                                                                 |
| Manuscript ID                   | bmjopen-2021-058277.R1                                                                                                                                                                                                                                                                                                                                                                                                                                                                                                                                                                                                                                                                                                                                                                                                                                                                                                                                                                                                                                                                                                                                                                                                                                                                                                                                                                                                                                                                                                          |
| Article Type:                   | Original research                                                                                                                                                                                                                                                                                                                                                                                                                                                                                                                                                                                                                                                                                                                                                                                                                                                                                                                                                                                                                                                                                                                                                                                                                                                                                                                                                                                                                                                                                                               |
| Date Submitted by the Author:   | 23-Mar-2022                                                                                                                                                                                                                                                                                                                                                                                                                                                                                                                                                                                                                                                                                                                                                                                                                                                                                                                                                                                                                                                                                                                                                                                                                                                                                                                                                                                                                                                                                                                     |
| Complete List of Authors:       | <p>Holm, Anna Engell; Gentofte Hospital, Department of Cardiology; Federal University of Acre, Multidisciplinary Center</p> <p>Gomes, Laura ; University of São Paulo Institute of Biomedical Sciences, Department of Parasitology</p> <p>Wegener, Alma; Gentofte Hospital, Department of Cardiology; Federal University of Acre, Multidisciplinary Center</p> <p>Lima, Karine ; Federal University of Acre, Multidisciplinary Center</p> <p>Matos, Luan; Federal University of Acre, Multidisciplinary Center</p> <p>Vieira, Isabelle ; Federal University of Acre, Multidisciplinary Center</p> <p>Kaagaard, Molly ; Gentofte Hospital, Department of Cardiology; Federal University of Acre, Multidisciplinary Center</p> <p>Pareek, Manan; Gentofte Hospital, Department of Cardiology; Yale-New Haven Hospital, Department of Internal Medicine, Yale New Haven Hospital, Yale University School of Medicine, New Haven, Connecticut, USA</p> <p>Medeiros de Souza, Rodrigo ; Federal University of Acre, Multidisciplinary Center</p> <p>Romero Farias Marinho, Claudio ; University of São Paulo Institute of Biomedical Sciences, Department of Parasitology</p> <p>Biering-Sorensen, Tor; Gentofte Hospital, Department of Cardiology; University of Copenhagen Department of Biomedical Sciences</p> <p>Silvestre, Odilson; Federal University of Acre, Health and Sport Science Center</p> <p>Brainin, Philip; Gentofte Hospital, Department of Cardiology; Federal University of Acre, Multidisciplinary Center</p> |
| <b>Primary Subject Heading</b>: | Global health                                                                                                                                                                                                                                                                                                                                                                                                                                                                                                                                                                                                                                                                                                                                                                                                                                                                                                                                                                                                                                                                                                                                                                                                                                                                                                                                                                                                                                                                                                                   |
| Secondary Subject Heading:      | Cardiovascular medicine, Public health, Epidemiology                                                                                                                                                                                                                                                                                                                                                                                                                                                                                                                                                                                                                                                                                                                                                                                                                                                                                                                                                                                                                                                                                                                                                                                                                                                                                                                                                                                                                                                                            |
| Keywords:                       | MENTAL HEALTH, CARDIOLOGY, PUBLIC HEALTH                                                                                                                                                                                                                                                                                                                                                                                                                                                                                                                                                                                                                                                                                                                                                                                                                                                                                                                                                                                                                                                                                                                                                                                                                                                                                                                                                                                                                                                                                        |
|                                 |                                                                                                                                                                                                                                                                                                                                                                                                                                                                                                                                                                                                                                                                                                                                                                                                                                                                                                                                                                                                                                                                                                                                                                                                                                                                                                                                                                                                                                                                                                                                 |

SCHOLARONE™  
Manuscripts

1  
2  
3  
4  
5  
6  
7  
8  
9  
10  
11  
12  
13  
14  
15  
16  
17  
18  
19  
20  
21  
22  
23  
24  
25  
26  
27  
28  
29  
30  
31  
32  
33  
34  
35  
36  
37  
38  
39  
40  
41  
42  
43  
44  
45  
46  
47  
48  
49  
50  
51  
52  
53  
54  
55  
56  
57  
58  
59  
60

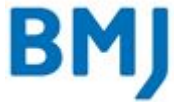

I, the Submitting Author has the right to grant and does grant on behalf of all authors of the Work (as defined in the below author licence), an exclusive licence and/or a non-exclusive licence for contributions from authors who are: i) UK Crown employees; ii) where BMJ has agreed a CC-BY licence shall apply, and/or iii) in accordance with the terms applicable for US Federal Government officers or employees acting as part of their official duties; on a worldwide, perpetual, irrevocable, royalty-free basis to BMJ Publishing Group Ltd ("BMJ") its licensees and where the relevant Journal is co-owned by BMJ to the co-owners of the Journal, to publish the Work in this journal and any other BMJ products and to exploit all rights, as set out in our [licence](#).

The Submitting Author accepts and understands that any supply made under these terms is made by BMJ to the Submitting Author unless you are acting as an employee on behalf of your employer or a postgraduate student of an affiliated institution which is paying any applicable article publishing charge ("APC") for Open Access articles. Where the Submitting Author wishes to make the Work available on an Open Access basis (and intends to pay the relevant APC), the terms of reuse of such Open Access shall be governed by a Creative Commons licence – details of these licences and which [Creative Commons](#) licence will apply to this Work are set out in our licence referred to above.

Other than as permitted in any relevant BMJ Author's Self Archiving Policies, I confirm this Work has not been accepted for publication elsewhere, is not being considered for publication elsewhere and does not duplicate material already published. I confirm all authors consent to publication of this Work and authorise the granting of this licence.



# Is self-rated health associated with cardiovascular risk factors and disease in a low-income setting? A cross-sectional study from the Amazon Basin of Brazil

Short title: Self-rated health and cardiac disease in the Amazon

Anna E. Holm, MD<sup>1,2</sup>; Laura Cordeiro Gomes<sup>4</sup>; Alma Wegener, BSc<sup>1,2</sup>; Karine O. Lima<sup>1</sup>; Luan O. Matos<sup>1</sup>; Isabelle V. M. Vieira<sup>1</sup>; Molly D. Kaagaard<sup>1,2</sup>; Manan Pareek, MD, PhD<sup>2,3</sup>; Rodrigo Medeiros de Souza, PhD<sup>1</sup>; Claudio Romero Farias Marinho, PhD<sup>4</sup>; Tor Biering-Sørensen, MD, PhD, MPH<sup>2,5</sup>; Odilson M. Silvestre, MD, PhD, MPH<sup>6</sup>; Philip Brainin, MD, PhD<sup>1,2</sup>

1) Multidisciplinary Center, Federal University of Acre, Câmpus Floresta, Cruzeiro do Sul, Acre, Brazil

2) Department of Cardiology, Herlev-Gentofte University Hospital, Hellerup, Denmark

3) Department of Internal Medicine, Yale New Haven Hospital, Yale University School of Medicine, New Haven, Connecticut, USA

4) Department of Parasitology, Institute of Biomedical Sciences, University of São Paulo, São Paulo, Brazil

5) Faculty of Biomedical Sciences, Copenhagen University, Copenhagen, Denmark

6) Health and Sport Science Center, Federal University of Acre, Rio Branco, Acre, Brazil

**Conflicts of interest:** The authors report no conflicts of interest

## Corresponding author:

Philip Brainin, MD, PhD

Estrada do Canela Fina, Km 12, Gleba Formoso

Federal University of Acre, Multidisciplinary Center, Câmpus Floresta

Cruzeiro do Sul, Acre, Brazil - ZIP 69980-00 AC

Mail: denlillefilur@hotmail.com

Cellphone: +45 29425299

Total word count: 3,043 (excluding tables and references)

## Abstract

**Objective:** Prior studies have suggested that self-rated health may be a useful indicator of cardiovascular disease. Consequently, we aimed to assess the relationship between self-rated health, cardiovascular risk factors, and subclinical cardiac disease in the Amazon Basin.

**Setting:** Cross-sectional study where self-rated health was obtained according to a visual analogue scale, ranging from 0 (poor) to 100 (excellent). We performed questionnaires, physical examination, and echocardiography. Logistic and linear regression models were applied to assess self-rated health, cardiac risk factors and cardiac disease by echocardiography. Multivariable models were mutually adjusted for other cardiovascular risk factors, clinical and socioeconomic data, and known cardiac disease.

**Results:** A total of 574 participants (mean age 41 years, 61% female) provided information on self-rated health (mean  $75 \pm 21$  [interquartile range 60 to 90] points). Self-rated health (per 10-point increase) was negatively associated with hypertension (OR 0.87 [95%CI 0.78-0.97],  $P=0.01$ ), hypercholesterolemia (OR 0.89 [95%CI 0.80-0.99],  $P=0.04$ ) and positively with healthy diet (OR 1.13 [95%CI 1.04-1.24],  $P=0.004$ ). Sex modified these associations ( $P$ -interaction $<0.05$ ) such that higher self-rated health was associated with healthy diet and physical activity in men, and lower odds of hypertension and hypercholesterolemia in women. No relationship was found with left ventricular ejection fraction $<45\%$  (OR 0.88 [95%CI 0.73 to 1.08],  $P=0.22$ ), left ventricular hypertrophy (OR 0.89 [95%CI 0.78 to 1.02],  $P=0.09$ ), or diastolic dysfunction (OR 0.92 [95%CI 0.75 to 1.15],  $P=0.47$ ).

**Conclusion:** Self-rated health was positively associated with health parameters in the Amazon Basin, but not with subclinical cardiac disease by echocardiography. Assessment

1  
2  
3  
4 of self-rated health could be useful for screening or as a target in healthcare policies for  
5  
6 lifestyle interventions.  
7  
8  
9

10  
11 Words: 265

12  
13 Keywords: self-rated health; cardiovascular risk factors; echocardiography, low and  
14  
15 middle-income countries  
16  
17

## 18 19 20 **Article summary**

### 21 22 **Strengths and limitations**

- 23  
24  
25 - This is the first study to examine self-rated health in a rural part of the Amazon  
26  
27 Basin of Brazil using an internationally recognized questionnaire, EQ-5D-5L.
- 28  
29 - We applied a state-of-the-art echocardiographic imaging protocol to identify  
30  
31 underlying cardiovascular disease
- 32  
33 - Self-reported health behavior could be subject to social and cultural biases
- 34  
35 - Because no standard values of the EQ-5D-5L health instrument have been  
36  
37 published for Brazil, it is not possible to compare our findings with other  
38  
39 populations.  
40  
41
- 42  
43 - The study design was cross-sectional.  
44  
45  
46  
47  
48  
49  
50  
51  
52  
53  
54  
55  
56  
57  
58  
59  
60

## Introduction

Cardiovascular disease is the leading cause of mortality worldwide and accounts for more than 31% of all deaths and 8% of public hospitalizations in Brazil [1,2]. Since the 1960s, Brazil has experienced a transition in health behavior and cardiovascular risk factors, where tobacco consumption has declined and obesity has increased [3]. Approximately 35% of Brazilian adults suffer from hypertension [4], the prevalence of diabetes mellitus is rising [5], and a high proportion of adults do not practice recommended levels of physical activity [1]. Differences in perception of risk factors and variability in access to healthcare unequivocally affect health behavior and the lifetime risk of cardiovascular disease. In this regard, self-rated health is widely used as a health indicator in various populations [6], is strongly associated with cardiovascular morbidity [7,8], and provides prognostic information on mortality [9]. Self-rated health and cardiovascular risk factors are also both influenced by sex [10,11]. Throughout the last decades, assessment of self-rated health has become increasingly important and is often used for healthcare surveillance and in policy making.

To understand whether self-rated health may be used to screen for cardiac disease in low-income settings, we aimed to investigate the relationship with cardiovascular risk factors and disease in the general population from the Amazon Basin of Brazil. We hypothesized that higher self-rated health is associated with less cardiovascular risk factors and disease, and that these relationships are modified by sex [12].

## Methods

### Study site

The study was conducted in the municipality of Cruzeiro do Sul, Acre (Northern Brazil; Amazon Basin). The prevalence for cardiovascular disease in Acre (5,815 per 100,000 inhabitants) is below the average rate for Brazil (6,025 per 100,000 inhabitants) and [2] the region is considered to be one of the poorest in Brazil and has one of the lowest population densities [13].

### Patient and Public Involvement

Patients or the public were not involved in the study design, recruitment to and conduct of the study nor reporting of results. All patients were informed of the results from their own examinations conducted in the study. Data will be made available upon reasonable request to the corresponding author.

### Sampling

This cross-sectional study was conducted as a part of the Malaria Heart Study (clinicaltrials.gov: NCT04445103). Participants from the general population were enrolled from June 2020 through December 2020. Through randomization, we selected 10 local healthcare clinics from Cruzeiro do Sul, equally distributed between rural and urban areas. Local healthcare agents provided lists of persons associated with each clinic from which a

1  
2  
3  
4 random sample was invited to participate in the study. We included persons  $\geq 18$  years old  
5  
6  
7  
8 who completed the examination program and responded to all questionnaires. Exclusion  
9  
10  
11 criteria were ongoing pregnancy, ongoing infection as assessed by examination of a  
12  
13  
14 medical doctor, and presence of *Plasmodium* in peripheral blood smears. A total of 504  
15  
16  
17 participants were included from healthcare clinics. A second group of 70 participants from  
18  
19  
20 the general population who had recently completed anti-malarial treatment, and for whom  
21  
22  
23 the above-mentioned inclusion and exclusion criteria also applied, were included as well.  
24  
25  
26

### 27 **Data collection**

28  
29 Two different questionnaires were administered by trained interviewers (i.e., study  
30  
31  
32 personnel). These interviewers also filled out the questionnaires. The first was the EQ-5D-  
33  
34 5L questionnaire which is validated in Brazilian Portuguese (study registration no.: 28276)  
35  
36 [14]. For the purpose of this study, we used data from the EQ visual analogue scale (EQ-  
37  
38 VAS) which provides a single estimate of self-rated health ranging from 0 to 100 points on  
39  
40 a continuous scale. Zero represents the worst possible self-rated health and 100  
41  
42 represents ideal health. The second questionnaire was used to gather information about  
43  
44 socioeconomic status, race, cardiovascular risk factors, known cardiac disease (prior  
45  
46 myocardial infarction and heart failure), and current medications. Race was self-reported,  
47  
48 and two persons did not answer this question. Afterwards, participants underwent a  
49  
50  
51 physical examination to measure height, weight, and blood pressure. Fingertick point-of-  
52  
53 care blood draws were used to measure glucose levels and to obtain thick and thin blood  
54  
55  
56 slides. Giemsa stained thick and thin blood slides were analyzed by two independent  
57  
58  
59  
60

1  
2  
3  
4 microscopists to detect *Plasmodium*. A medical doctor (PB) evaluated all patients. None of  
5  
6 them displayed clinical signs or symptoms of heart disease (absence of shortness of  
7  
8 breath, chest pain, swelling of legs and irregular heart rhythm).  
9  
10

### 11 12 13 **Cardiovascular risk factors**

14  
15 We assessed seven different cardiovascular risk factors. Hypertension was defined as a  
16  
17 physician diagnosis of hypertension or intake of anti-hypertensive medication,  
18  
19 hypercholesterolemia as a physician diagnosis of dyslipidemia or intake of lipid lowering  
20  
21 medication, and diabetes as a physician diagnosis of diabetes or fasting blood glucose  
22  
23 >126mg/dL [15]. Body mass index (BMI) was calculated as: body weight  
24  
25 (kilograms)/height<sup>2</sup> (meters), and obesity was defined as BMI ≥30kg/m<sup>2</sup>. Participants were  
26  
27  
28 classified as smokers if they were current smokers or had previously smoked. A healthy  
29  
30 diet was defined as intake of any quantity of vegetables with a main meal ≥3 times/week.  
31  
32  
33  
34  
35  
36  
37 Physical activity was defined as participation in any kind of physical activity during leisure  
38  
39  
40 time. We did not apply any time limit or threshold.  
41  
42  
43  
44  
45

### 46 **Biochemistry**

47  
48 Field procedures: During examinations, we collected peripheral venous blood samples in  
49  
50 citrate, EDTA, and serum-separator tubes, which were cooled at 2-8°C. Citrate plasma  
51  
52 was immediately separated by centrifugation (12 minutes, 3200 rpm) in a mobile  
53  
54 laboratory and transferred to Eppendorf tubes.  
55  
56  
57  
58  
59  
60

1  
2  
3  
4 Laboratory: Serum-separator tubes underwent centrifugation (10 min, 3000rpm) to extract  
5  
6 serum which was subsequently stored at -20°C in Eppendorf tubes. Laboratory analyses  
7  
8 were performed at Citolab and Centro de Diagnósticos, Cruzeiro do Sul, Acre, Brazil.  
9  
10 Using EDTA blood, a complete blood count with a differential was conducted (NX-350,  
11  
12 Sysmex, Japan; Citolab), and reticulocytes were counted manually (Citolab) [16]. Citrate  
13  
14 plasma was used to analyze coagulation parameters (Coagmaster 2.0, Wama  
15  
16 Diagnóstica, Brazil; Citolab). Serum was used to measure creatinine, bilirubin, and C-  
17  
18 reactive protein (Cobas c111, Roche Diagnostics, Switzerland; Citolab and Centro de  
19  
20 Diagnósticos). Analyses of C-reactive protein were only available in a subset of  
21  
22 participants (n=436).  
23  
24  
25  
26  
27  
28  
29

### 30 **Echocardiography**

31  
32 A single medical doctor either performed or supervised all echocardiographic examinations  
33  
34 (PB). Quality control was conducted on a frequent basis in a central imaging laboratory  
35  
36 (Herlev-Gentofte Hospital, Denmark) by an investigator certified in echocardiography by  
37  
38 the European Association of Cardiovascular Imaging. Examinations were performed  
39  
40 bedside (Vivid-IQ, GE Healthcare, Norway), and images were stored offline for analysis in  
41  
42 EchoPAC BT13 (v. 203.82). Analyses were conducted by AW according to contemporary  
43  
44 guidelines [17]. Rheumatic heart disease was assessed by PB according to the World  
45  
46 Heart Federation criteria [18]. We assessed three categories of subclinical left ventricular  
47  
48 (LV) cardiac disease: (i) reduced contractile function defined as LV ejection fraction <45%,  
49  
50 (ii) LV hypertrophy defined as LV mass index >115g/m<sup>2</sup> for men and >95g/m<sup>2</sup> for women  
51  
52 and (iii) diastolic dysfunction determined according to existing guidelines [19].  
53  
54  
55

56  
57 Classification of diastolic dysfunction involves assessment of early and late mitral inflow  
58  
59  
60



1  
2  
3  
4 velocity, mitral annular early diastolic velocity, tricuspid regurgitation velocity and the left  
5  
6 atrial volume index. Additional details are described in Supplemental Data 'Methods'.  
7  
8  
9

## 10 11 **Ethics**

12  
13 The study was approved by the institutional review committee at Federal University of Acre  
14 and University of São Paulo (CAAE: 26552619.6.0000.510 and 32947520.4.0000.5467),  
15  
16 local health care authorities and leaders of health care clinics. The study complies with the  
17  
18 2<sup>nd</sup> Declaration of Helsinki, and all patients provided written informed consent on oral and  
19  
20 written information given in Portuguese. Illiterate participants provided fingerprints instead  
21  
22 of signatures. For ethical reasons a medical doctor evaluated all participants on-site, and  
23  
24 in case of suspected heart disease participants were referred to a cardiologist.  
25  
26  
27  
28

29 Data from the study is available upon reasonable request to the senior author. Patients or  
30  
31 the public were not involved in the study design or reporting of results.  
32  
33  
34  
35

## 36 37 **Statistics**

38  
39 Baseline characteristics for the study population were stratified according to tertiles of self-  
40  
41 rated health (cut-offs of 70 and 91 points) and sex. Due to the nature of the distribution,  
42  
43 tertiles of self-rated health did not contain equal amounts of participants. P for trend was  
44  
45 calculated using linear regression models and the Cuzick nonparametric test for trend [20].  
46  
47 Differences between groups were compared using the chi-square test, Student's *t*-test,  
48  
49 and the Wilcoxon rank-sum test, as appropriate. Histograms were conducted to display the  
50  
51 distribution of self-rated health. In all statistical tests, self-rated health was treated as a  
52  
53 continuous variable. Logistic regression models were conducted to examine the  
54  
55 relationship between self-rated health and cardiovascular risk factors and disease.  
56  
57  
58  
59  
60

1  
2  
3  
4 Multivariable models were adjusted for core variables: clinical data (age, sex, race),  
5  
6 socioeconomic data (work, family income, living area), known cardiac disease (prior  
7  
8 myocardial infarction, heart failure, rheumatic heart disease). In addition, all associations  
9  
10 with cardiovascular risk factors were mutually adjusted for all other risk factors.  
11  
12

13 Interactions with sex were also examined. Family income was log-transformed to provide a  
14  
15 normal distribution. The relationship between self-rated health and (i) the sum of cardiac  
16  
17 risk factors (hypertension, hypercholesterolemia, diabetes, obesity, smoking) and (ii)  
18  
19 echocardiographic parameters were assessed in linear regression models, which were  
20  
21 adjusted for the core variables. All analyses were conducted in Stata v.14.2 (StataCorp,  
22  
23 Texas, USA) and RStudio v.1.3 (R, Vienna, Austria). Two-sided P-values <0.05 were  
24  
25 considered statistically significant.  
26  
27  
28  
29  
30  
31  
32  
33  
34  
35  
36  
37  
38  
39  
40  
41  
42  
43  
44  
45  
46  
47  
48  
49  
50  
51  
52  
53  
54  
55  
56  
57  
58  
59  
60

## Results

A total of 574 participants were assessed (mean age  $41 \pm 15$  years, 61% female). Mean self-rated health was  $75 \pm 21$  points (interquartile range 60 to 90 points) (Figure 1A). Four participants (<1%) reported 0 points, and 91 participants (16%) reported 100 points. The prevalences of cardiovascular risk factors were 20% for hypertension, 16% for hypercholesterolemia, 6% for diabetes, 23% for obesity, 38% for current or prior smoking, 52% for unhealthy diet, and 63% for absence of physical activity. Participants with lower self-rated health more frequently had all of the above risk factors and were older compared with participants with high self-rated health (P-trend<0.05; Table 1). No differences were observed in socioeconomic characteristics, biochemistry, or subclinical cardiac disease by echocardiography (reduced LV ejection fraction, hypertrophy, diastolic dysfunction) across tertiles of self-rated health (Table 1).

### Cardiovascular risk factors

In unadjusted logistic regression models, better self-rated health was significantly associated with lower odds of all cardiovascular risk factors (P<0.05 for all; Table 2). In adjusted models, self-rated health (per 10-point increase) was associated with lower odds of hypertension (OR 0.87 [95%CI 0.78 to 0.97], P=0.01), hypercholesterolemia (OR 0.89 [95%CI 0.80 to 0.99], P=0.04) and higher odds of healthy diet (OR 1.13 [95%CI 1.04 to 1.24], P=0.004). In multivariable models, better self-rated health was also associated with the sum of cardiovascular risk factors (beta = -0.07 per 10-point increase [95%CI -0.10 to -0.03], P<0.001).

### Subclinical cardiac disease by echocardiography

No significant associations were found between self-rated health (per 10-point increase) and subclinical cardiac disease by echocardiography: LV ejection fraction <45% (OR 0.88 [95%CI 0.73 to 1.08], P= 0.22), LV hypertrophy (OR 0.87 [95%CI 0.72 to 1.07], P=0.19) or diastolic dysfunction (OR 0.92 [95%CI 0.75 to 1.15], P=0.47) (Table 2). No individual echocardiographic parameters were significantly associated with self-rated health in multivariable models (P>0.05 for all; Table 3).

### Interactions with sex

Self-rated health was higher in men than in women (77 vs 73 points) but the difference was not statistically significant (P=0.09) (Figure 1B-C). In general, women had higher body mass index, lower income, less frequently smoked, and were more physically active compared with men (P<0.05 for all; Supplemental Table 1). Sex modified the associations with hypertension, smoking, healthy diet, and physical activity, but not cardiac disease by echocardiography (Table 2). Unadjusted associations with cardiovascular risk factors, stratified by sex, are presented in Figure 2. For men, higher self-rated health (per 10-point increase) yielded greater odds of a healthy diet (adjusted OR 1.33 [95%CI 1.12 to 1.59], P=0.002) and physical activity (adjusted OR 1.24 [95%CI 1.03 to 1.50], P=0.02). For women, higher self-rated health (per 10-point increase) was associated with lower odds of hypertension (adjusted OR 0.85 [95%CI 0.74 to 0.97], P=0.016), and hypercholesterolemia (adjusted OR 0.87 [95%CI 0.76 to 0.99], P=0.046).

## Discussion

This study has two principal findings. First, in a sample of the general population from the Amazon Basin, we found that self-rated health was significantly associated with cardiovascular risk factors and that these association were modified by sex. Second, self-rated health was not associated with cardiac disease assessed by echocardiography. These findings indicate that in a low-income setting, self-rated health may to some extent provide information on cardiac risk profiles.

Self-rated health has previously been related to cardiovascular disease in various observational studies [21–23]. Higher self-rated health is related to a lower burden of cardiovascular risk factors (hypertension, hypercholesterolemia, diabetes, obesity), associations that persist after accounting for sociodemographic characteristics and baseline cardiac disease. Proposed mechanisms involve (i) chronic elevation of inflammatory cytokines ('immune-activated sickness') [24], (ii) a poorly balanced activation of the autonomous nervous system, and (iii) glucose levels [25]. Furthermore, self-rated health has been linked to subclinical cardiac alterations, e.g., elevated coronary artery calcium score [21], cardiac biomarkers [26], and reduced right ventricular function [27]. We found no associations with left or right ventricular echocardiographic parameters, possibly because our sample was derived from an overall healthy general population, participants were young (mean age 41 years), and echocardiographic alterations may possibly occur later in the cascade of cardiac pathology compared with elevated calcium scores and biomarkers.

1  
2  
3  
4 Importantly, women had somewhat lower self-rated health than men, and the relationship  
5  
6 with cardiovascular risk factors was further modified by sex. Both findings are in line with  
7  
8 previously published data [28–30]. While the mechanisms for this remain unknown,  
9  
10 women may be particularly sensitive to chronic health conditions, thus affecting self-rated  
11  
12 health [31]. Recent studies have demonstrated that the prevalence of cardiovascular  
13  
14 disease is higher in women, emphasizing that an appraisal of sex differences is necessary  
15  
16 to obtain maximum benefit of lifestyle interventions for the prevention of cardiac disease  
17  
18 [32].  
19  
20  
21  
22  
23  
24

25 Throughout the last decades, quality of life has been used as a tool to measure outcome  
26  
27 of healthcare interventions and guide healthcare policy making. Although self-rated health  
28  
29 represents a generic measure that encompasses many dimensions of health, and as such,  
30  
31 has limited sensitivity to address specific health issues, it is considered a reliable measure  
32  
33 to compare health in different populations and to evaluate disease burden [33]. Because  
34  
35 classic risk tools for cardiovascular disease do not capture social determinants, it has even  
36  
37 been argued that self-rated health, in addition to classic risk factors, may be more useful  
38  
39 for cardiovascular risk prediction. The EQ-5D visual analogue scale constitutes a widely  
40  
41 used tool for this purpose [14]. In the Amazon Basin, the average self-rated health score  
42  
43 was 75 points, which is lower compared to other studies from Brazil, where average  
44  
45 scores of 78 to 84 points have been reported [10,34]. Notably, none of these studies were  
46  
47 conducted in Northern Brazil, and the assessed populations were younger than our  
48  
49 sample. In addition, differences in cultural, regional, and disease patterns may partake in  
50  
51 understanding this difference, and further explain why general life expectancy in the  
52  
53 Amazon Basin is below the national average in Brazil [35].  
54  
55  
56  
57  
58  
59  
60

1  
2  
3  
4 Self-rated health relies on patient-centered care, which integrates the patient's  
5  
6 environment, values, and preferences, hence making it meaningful to the patient and the  
7  
8 treating clinician. It is a reproducible and consistent measure across different populations  
9  
10 and geographical regions [33], and it may potentially complement well-established risk  
11  
12 scoring models for cardiovascular disease [36]. Because self-rated health is easily  
13  
14 obtained, it can help to facilitate risk assessment strategies. This is particularly important in  
15  
16 areas such as the Amazon Basin where access to healthcare is highly variable and often  
17  
18 limited. Considering the close relationship we found with several cardiovascular risk  
19  
20 factors, self-rated health could be obtained by non-medical personnel and enable  
21  
22 screening of remote communities. Consequently, selected individuals, i.e., persons with  
23  
24 low self-rated health and no known cardiovascular risk factors, could be referred for risk  
25  
26 factor optimization in healthcare facilities. Furthermore, it could be used as a measure for  
27  
28 the effect of primary healthcare prevention strategies, similar to what has been reported  
29  
30 previously [37]. Whether self-rated health is linked to clinical outcomes in the Amazon  
31  
32 Basin, and if improvement in self-rated health could improve prognosis, should be  
33  
34 explored in future studies.  
35  
36  
37  
38  
39  
40  
41  
42

### 43 **Strengths and Limitations**

44  
45 Socioeconomic status is associated with self-rated health and cardiovascular risk factors  
46  
47 [38,39], and despite our multivariable adjustment, residual confounding may still exist.

48  
49 Health related behavior, including healthy diet and physical activity, was self-reported and  
50  
51 this could be associated with bias. Furthermore, it is a limitation that the questionnaire for  
52  
53 health behavior has not been validated in other studies or settings. We adjusted our  
54  
55 models for cardiac disease at baseline and in an attempt to limit reverse causation;  
56  
57  
58  
59  
60

1  
2  
3  
4 however, some effect may persist. As no standard data values of the EQ-5D-5L have been  
5  
6 published in Brazil, we did not apply data from the five dimensions of quality of life in this  
7  
8 study, nor calculate index scores. Data from this study represents an important first step in  
9  
10 establishing EQ-5D-5L index values for the rural parts of the Amazon basin. Reference  
11  
12 values for the EQ-5D-3L [10] have been published, but cross-walk datasets are not  
13  
14 available. To avoid the inclusion of white coat hypertension, we defined hypertension  
15  
16 based on prior physician diagnosis and/or intake of anti-hypertensive medication. While  
17  
18 the generalizability of our findings to other regions in the world may be disputed, the  
19  
20 Amazon Basin covers eight other countries in addition to Brazil. Hence, our findings are  
21  
22 likely to be applicable to populations in these areas or to populations who share similar  
23  
24 environment and culture.  
25  
26  
27  
28  
29  
30  
31

## 32 **Conclusion**

33  
34 Self-rated health was positively associated with a healthy lifestyle, and this relationship  
35  
36 was modified by sex. Conversely, self-rated health was not associated with cardiac  
37  
38 disease by echocardiography. Healthcare policies could potentially utilize self-rated health  
39  
40 for screening or as a target to improve health behavior.  
41  
42  
43  
44  
45

### 46 ***What is already known on this subject?***

47  
48 Self-rated health is widely used as a health indicator in various populations and provides  
49  
50 prognostic information on mortality.  
51  
52  
53  
54

### 55 ***What does this study add?***



1  
2  
3  
4 In the Amazon basin self-rated health was significantly associated with cardiovascular risk  
5 factors, but not with subclinical cardiac disease by echocardiography. Assessment of self-  
6 rated health is easily obtained and could potentially be used to measure the effect of  
7 lifestyle and healthcare interventions in areas with restricted access to healthcare.  
8  
9  
10  
11  
12  
13  
14  
15  
16  
17

### 18 **Acknowledgements**

19  
20 We are thankful for the help and guidance from Dr. Suiane da Costa Negreiros do Valle  
21 and Janaína Alencar.  
22  
23  
24  
25

### 26 **Data availability statement**

27  
28 Data from the study is available upon reasonable request to the senior author. This  
29 involves de-identified participant data and statistical analyses and plans.  
30  
31  
32  
33  
34  
35  
36  
37  
38  
39  
40  
41  
42  
43  
44  
45  
46  
47  
48  
49  
50  
51  
52  
53  
54  
55  
56  
57  
58  
59  
60

## Funding

### Funding specifically rewarded for the Malaria Heart Study:

PB and AEH: Jette and Hans Henrik Jensen (No. N/A), The Independent Research Fund Denmark (0129-0003B), Dansk Medicinsk Selskab København (120620-kms), Julie von Müllens Fond (No. N/A), Knud Højgaards Fond (18-05-2487), A. P. Møllers Lægefond (18-L-0026), Reinholdt W. Jorck og Hustrus Fond (18-JU-0485), Eva og Henry Frænkels Mindefond (NLA-080919), Astra Zeneca/Danish Society of Cardiology (No. N/A), Internal Funds at Herlev-Gentofte Hospital (No. N/A), Torben og Alice Frimodts Fond (TA250419), Brorsons Fond (12038-1-hh), Lundbeckfonden (R373-2021-1201).

AW: Danish Heart Association (20-R139-A9644-22165), William Demant (20-1257), Knud Højgaards Fond (20-01-1076), Reinholdt W. Jorck og Hustrus Fond (20-JU-0145).

MK: Novo Nordisk Fonden (NNF20OC0062782).

LCG: CNPq (142306/2020-7).

### Other sources of funding:

CRFM: FAPESP (2020/06747-4) and CNPq (302917/2019-5).

No sponsors had any role in the design, conduction or analysis of the study.

## Contributor statement

AEH: Conception of study, planning and design, funding, data acquisition, data analysis, statistics, writing, critical review.

1  
2  
3  
4 LCG: Data acquisition, planning  
5  
6

7 AW: Data acquisition, data analysis, critical review  
8  
9

10 KOL: Data acquisition  
11  
12

13 LOM: Data acquisition  
14  
15

16 IVMV: Data acquisition  
17  
18

19 MDK: Data analysis, critical review  
20  
21

22 MP: Critical review  
23  
24

25 RMS: Expert advice  
26  
27

28 CRF: Expert advice  
29  
30

31 TBS: Conception of study  
32  
33

34 OMS: Conception of study  
35  
36

37  
38 PB (responsible for the overall content as guarantor): Conception of study, planning and  
39 design, funding, data acquisition, data analysis, statistics, writing, critical review.  
40  
41  
42  
43  
44  
45

### 46 **Ethics approval statement**

47

48  
49 This study involves human participants and was approved by an Ethics Committee. Ethics  
50 committee at Federal University of Acre and University of São Paulo (CAAE:  
51 26552619.6.0000.510 and 32947520.4.0000.5467)  
52  
53  
54  
55  
56  
57  
58  
59  
60

## Disclosures

The authors report no conflicts of interest.

For peer review only

## References

1. Ribeiro, A.L.P.; Duncan, B.B.; Brant, L.C.C.; Lotufo, P.A.; Mill, J.G.; Barreto, S.M. Cardiovascular Health in Brazil Trends and Perspectives. *Circulation* **2016**, *133*, 422–433, doi:10.1161/CIRCULATIONAHA.114.008727.
2. Oliveira, G.M.M.; Brant, L.C.C.; Polanczyk, C.A.; Biolo, A.; Nascimento, B.R.; Malta, D.C.; Souza, M.F.M.; Soares, G.P.; Junior, G.F.X.; Machline-Carrion, M.J.; et al. Cardiovascular Statistics – Brazil 2020. *Arq Bras Cardiol* **2020**, *115*, 308–439.
3. Ribeiro, A.L.P.; Duncan, B.B.; Brant, L.C.C.; Lotufo, P.A.; Mill, J.G.; Barreto, S.M. Cardiovascular Health in Brazil Trends and Perspectives. *Circulation* **2016**, *133*, 422–433, doi:10.1161/CIRCULATIONAHA.114.008727.
4. Chor, D.; Pinho Ribeiro, A.L.; Sá Carvalho, M.; Duncan, B.B.; Andrade Lotufo, P.; Araújo Nobre, A.; De Aquino, E.M.L.L.; Schmidt, M.I.; Griep, R.H.; Molina, M.D.C.B.; et al. Prevalence, awareness, treatment and influence of socioeconomic variables on control of high blood pressure: Results of the ELSA-Brasil study. *PLoS One* **2015**, *10*, 1–14, doi:10.1371/journal.pone.0127382.
5. Ministério da Saúde *Vigitel Brasil 2019; 2020*; ISBN 9788533427655.
6. Hosseinpoor, A.R.; Stewart Williams, J.; Amin, A.; Araujo de Carvalho, I.; Beard, J.; Boerma, T.; Kowal, P.; Naidoo, N.; Chatterji, S. Social determinants of self-reported health in women and men: Understanding the role of gender in population health. *PLoS One* **2012**, *7*, doi:10.1371/journal.pone.0034799.
7. van der Linde, R.M.; Mavaddat, N.; Luben, R.; Brayne, C.; Simmons, R.K.; Khaw, K.T.; Kinmonth, A.L. Self-Rated Health and Cardiovascular Disease Incidence: Results from a Longitudinal Population-Based Cohort in Norfolk, UK. *PLoS One* **2013**, *8*, 2–9, doi:10.1371/journal.pone.0065290.

- 1  
2  
3  
4 8. Møller, L.; Kristensen, T.S.; Hollnagel, H. Self rated health as a predictor of coronary  
5 heart disease in Copenhagen, Denmark. *J Epidemiol Community Health* **1996**, *50*,  
6 423–428, doi:10.1136/jech.50.4.423.  
7  
8
- 9  
10  
11 9. Idler, E.L.; Benyamini, Y. Self-Rated Health and Mortality: A Review of Twenty-  
12 Seven Community Studies. *J Health Soc Behav* **1997**, *38*, 21–37,  
13 doi:10.2307/2955359.  
14  
15
- 16  
17  
18 10. Santos, M.; Monteiro, A.L.; Santos, B. EQ-5D Brazilian population norms. *Health*  
19 *Qual Life Outcomes* **2021**, *19*, 1–7, doi:10.1186/s12955-021-01671-6.  
20  
21
- 22  
23 11. Gonçalves, R.P.F.; Haikal, D.S.; Freitas, M.I. de F.; Machado, Í.E.; Malta, D.C. Self-  
24 reported medical diagnosis of heart disease and associated risk factors: National  
25 health survey. *Rev Bras Epidemiol* **2019**, *22*, doi:10.1590/1980-  
26 549720190016.supl.2.  
27  
28
- 29  
30  
31 12. Boerma, T.; Hosseinpoor, A.R.; Verdes, E.; Chatterji, S. A global assessment of the  
32 gender gap in self-reported health with survey data from 59 countries. *BMC Public*  
33 *Health* **2016**, *16*, 1–9, doi:10.1186/s12889-016-3352-y.  
34  
35
- 36  
37  
38 13. Paim, J.; Travassos, C.; Almeida, C.; Bahia, L.; MacInko, J. The Brazilian health  
39 system: History, advances, and challenges. *Lancet* **2011**, *377*, 1778–1797,  
40 doi:10.1016/S0140-6736(11)60054-8.  
41  
42
- 43  
44  
45 14. EuroQol EQ-5D-5L questionnaire in Brazilian Portuguese Available online:  
46 <https://euroqol.org/eq-5d-instruments/> (accessed on Jul 13, 2021).  
47  
48
- 49  
50  
51 15. American Diabetes Association 2 . Classification and Diagnosis of Diabetes:  
52 Standards of Medical Care in Diabetes, 2020. *Diabetes Care* **2020**, *43*, 14–31,  
53 doi:10.2337/dc20-S002.  
54  
55
- 56  
57  
58 16. Simionatto, M.; De Paula, J.P.; Chaves, M.A.F.; Bortoloso, M.; Cicchetti, D.; Leonart,  
59  
60

1  
2  
3  
4  
5  
6  
7  
8  
9  
10  
11  
12  
13  
14  
15  
16  
17  
18  
19  
20  
21  
22  
23  
24  
25  
26  
27  
28  
29  
30  
31  
32  
33  
34  
35  
36  
37  
38  
39  
40  
41  
42  
43  
44  
45  
46  
47  
48  
49  
50  
51  
52  
53  
54  
55  
56  
57  
58  
59  
60

M.S.S.; Do Nascimento, A.J. Manual and automated reticulocyte counts.

*Hematology* **2010**, *15*, 406–409, doi:10.1179/102453310X12647083621128.

17. Lang, R.M.; Badano, L.P.; Mor-Avi, V.; Afilalo, J.; Armstrong, A.; Ernande, L.; Flachskampf, F.A.; Foster, E.; Goldstein, S.A.; Kuznetsova, T.; et al. Recommendations for cardiac chamber quantification by echocardiography in adults: An update from the American Society of Echocardiography and the European Association of Cardiovascular Imaging. *J Am Soc Echocardiogr* **2015**, *28*, 1-39.e14, doi:10.1016/j.echo.2014.10.003.
18. Reméanyi, B.; Wilson, N.; Steer, A.; Ferreira, B.; Kado, J.; Kumar, K.; Lawrenson, J.; Maguire, G.; Marijon, E.; Mirabel, M.; et al. World Heart Federation criteria for echocardiographic diagnosis of rheumatic heart disease—an evidence-based guideline. *Nat Rev Cardiol* **2012**, *9*, 297–309, doi:10.1038/nrcardio.2012.7.
19. Nagueh, S.F.; Smiseth, O.A.; Appleton, C.P.; Byrd, B.F.; Dokainish, H.; Edvardsen, T.; Flachskampf, F.A.; Gillebert, T.C.; Klein, A.L.; Lancellotti, P.; et al. Recommendations for the evaluation of left ventricular diastolic function by echocardiography: An update from the American society of echocardiography and the European association of cardiovascular imaging. *Eur Heart J Cardiovasc Imaging* **2016**, *17*, 1321–1360, doi:10.1093/ehjci/jew082.
20. Cuzick, J. A wilcoxon-type test for trend. *Stat Med* **1985**, *4*, 87–90, doi:10.1002/sim.4780040112.
21. Orimoloye, O.A.; Mirbolouk, M.; Uddin, S.M.I.; Dardari, Z.A.; Miedema, M.D.; Al-Mallah, M.H.; Yeboah, J.; Blankstein, R.; Nasir, K.; Blaha, M.J. Association between Self-rated Health, Coronary Artery Calcium Scores, and Atherosclerotic Cardiovascular Disease Risk: The Multi-Ethnic Study of Atherosclerosis (MESA).

- 1  
2  
3  
4 *JAMA Netw Open* **2019**, 2, 1–11, doi:10.1001/jamanetworkopen.2018.8023.
- 5  
6  
7 22. Dong, W.; Pan, X.F.; Yu, C.; Lv, J.; Guo, Y.; Bian, Z.; Yang, L.; Chen, Y.; Wu, T.;  
8  
9 Chen, Z.; et al. Self-Rated Health Status and Risk of Ischemic Heart Disease in the  
10  
11 China Kadoorie Biobank Study: A Population-Based Cohort Study. *J Am Heart*  
12  
13 *Assoc* **2017**, 6, doi:10.1161/JAHA.117.006595.
- 14  
15  
16 23. Korhonen, P.E.; Kautiainen, H.; Mäntyselkä, P. Screening for cardiovascular risk  
17  
18 factors and self-rated health in a community setting: A cross-sectional study in  
19  
20 Finland. *Br J Gen Pract* **2014**, 64, e611–e615, doi:10.3399/bjgp14X681769.
- 21  
22  
23 24. Lekander, M.; Elofsson, S.; Neve, I.M.; Hansson, L.O.; Uden, A.L. Self-rated health  
24  
25 is related to levels of circulating cytokines. *Psychosom Med* **2004**, 66, 559–563,  
26  
27 doi:10.1097/01.psy.0000130491.95823.94.
- 28  
29  
30 25. Jarczok, M.N.; Kleber, M.E.; Koenig, J.; Loerbroks, A.; Herr, R.M.; Hoffmann, K.;  
31  
32 Fischer, J.E.; Benyamini, Y.; Thayer, J.F. Investigating the associations of self-rated  
33  
34 health: Heart rate variability is more strongly associated than inflammatory and other  
35  
36 frequently used biomarkers in a cross sectional occupational sample. *PLoS One*  
37  
38 **2015**, 10, 1–19, doi:10.1371/journal.pone.0117196.
- 39  
40  
41 26. Kananen, L.; Enroth, L.; Raitanen, J.; Jylhävä, J.; Bürkle, A.; Moreno-Villanueva, M.;  
42  
43 Bernhardt, J.; Toussaint, O.; Grubeck-Loebenstein, B.; Malavolta, M.; et al. Self-  
44  
45 rated health in individuals with and without disease is associated with multiple  
46  
47 biomarkers representing multiple biological domains. *Sci Rep* **2021**, 11, 1–14,  
48  
49 doi:10.1038/s41598-021-85668-7.
- 50  
51  
52 27. Liu, Y.-T.; Lai, J.-Z.; Zhai, F.-F.; Han, F.; Zhou, L.-X.; Ni, J.; Yao, M.; Tian, Z.; Zhu,  
53  
54 Y.-L.; Chen, W.; et al. Right ventricular systolic function is associated with health-  
55  
56 related quality of life: a cross-sectional study in community-dwelling populations. *Ann*  
57  
58  
59  
60



1  
2  
3  
4  
5  
6  
7  
8  
9  
10  
11  
12  
13  
14  
15  
16  
17  
18  
19  
20  
21  
22  
23  
24  
25  
26  
27  
28  
29  
30  
31  
32  
33  
34  
35  
36  
37  
38  
39  
40  
41  
42  
43  
44  
45  
46  
47  
48  
49  
50  
51  
52  
53  
54  
55  
56  
57  
58  
59  
60

*Transl Med* **2021**, *9*, 640–640, doi:10.21037/atm-20-6845.

28. Rutledge, T.; Linke, S.E.; Johnson, B.D.; Bittner, V.; Krantz, D.S.; Whittaker, K.S.; Eastwood, J.A.; Eteiba, W.; Cornell, C.E.; Pepine, C.J.; et al. Self-rated versus objective health indicators as predictors of major cardiovascular events: The NHLBI-sponsored women's ischemia syndrome evaluation. *Psychosom Med* **2010**, *72*, 549–555, doi:10.1097/PSY.0b013e3181dc0259.
29. de Mendonça Freire, L.; Dalamaria, T.; de Aquino Cunha, M.; de Souza, O.F. Self-Rated Health in University Students from Rio Branco in the Western Brazilian Amazon. *Health (Irvine Calif)* **2014**, *06*, 2245–2249, doi:10.4236/health.2014.616260.
30. Schmidt, M. Predictors of self-rated health and lifestyle behaviours in Swedish university students. *Glob J Health Sci* **2012**, *4*, 1–14, doi:10.5539/gjhs.v4n4p1.
31. Shadbolt, B. Some Correlates of Self-Rated Health. *Am J Public Health* **1997**, *87*, 951–960.
32. Appelman, Y.; van Rijn, B.B.; ten Haaf, M.E.; Boersma, E.; Peters, S.A.E. Sex differences in cardiovascular risk factors and disease prevention. *Atherosclerosis* **2014**, *241*, 211–218, doi:10.1016/j.atherosclerosis.2015.01.027.
33. Salomon, J.A.; Tandon, A.; Murray, C.J.L. Comparability of self rated health: cross sectional multi-country survey using anchoring vignettes. *BMJ* **2004**, *328*, 258-261, doi:10.1136/bmj.37963.691632.44.
34. Menezes, R. de M.; Andrade, M.V.; Noronha, K.V.M. de S.; Kind, P. EQ-5D-3L as a health measure of Brazilian adult population. *Qual Life Res* **2015**, *24*, 2761–2776, doi:10.1007/s11136-015-0994-7.
35. Marinho, F.; de Azeredo Passos, V.M.; Carvalho Malta, D.; Barboza França, E.;

- 1  
2  
3  
4 Abreu, D.M.X.; Araújo, V.E.M.; Bustamante-Teixeira, M.T.; Camargos, P.A.M.; da  
5  
6 Cunha, C.C.; Duncan, B.B.; et al. Burden of disease in Brazil, 1990–2016: a  
7  
8 systematic subnational analysis for the Global Burden of Disease Study 2016.  
9  
10 *Lancet* **2018**, 392, 760–775, doi:10.1016/S0140-6736(18)31221-2.  
11  
12
- 13 36. May, M.; Lawlor, D.A.; Brindle, P.; Patel, R.; May, M. Cardiovascular disease risk  
14  
15 assessment in older women: can we improve on Framingham? British Women's  
16  
17 Heart and Health prospective cohort study. *Heart* **2006**, 92, 1396-1401,  
18  
19 doi:10.1136/hrt.2005.085381.  
20  
21
- 22 37. Denman, C.A.; Bell, M.L.; Cornejo, E.; De Zapien, J.G.; Carvajal, S.; Rosales, C.  
23  
24 Changes in health behaviors and self-rated health of participants in Meta Salud: A  
25  
26 primary prevention intervention of NCD in Mexico. *Glob Heart* **2015**, 10, 55–61,  
27  
28 doi:10.1016/j.gheart.2014.12.007.  
29  
30
- 31 38. McFadden, E.; Luben, R.; Wareham, N.; Bingham, S.; Khaw, KT. Occupational  
32  
33 social class, risk factors and cardiovascular disease incidence in men and women: a  
34  
35 prospective study in the European Prospective Investigation of Cancer and Nutrition  
36  
37 in Norfolk (EPIC-Norfolk) cohort. *Eur J Epidemiol* **2008**, 23, 449-458,  
38  
39 doi:10.1007/s10654-008-9262-2.  
40  
41
- 42 39. Kaplan, G.A.; Keil, J.E. *Socioeconomic Factors and Cardiovascular Disease: A*  
43  
44 *Review of the Literature*. *Circulation* **1993**, 88, 1973-1998,  
45  
46 doi:10.1161/01.cir.88.4.1973  
47  
48  
49  
50  
51  
52  
53  
54  
55  
56  
57  
58  
59  
60

1  
2  
3  
4  
5  
6  
7  
8  
9  
10  
11  
12  
13  
14  
15  
16  
17  
18  
19  
20  
21  
22  
23  
24  
25  
26  
27  
28  
29  
30  
31  
32  
33  
34  
35  
36  
37  
38  
39  
40  
41  
42  
43  
44  
45  
46  
47  
48  
49  
50  
51  
52  
53  
54  
55  
56  
57  
58  
59  
60

## Figure legends

### Figure 1A-C

Title: Histograms of self-rated health

Legend: Distribution of self-rated health in the (A) entire study population (n=574), (B) in men (n=224) and (C) in women (n=350).

### Figure 2.

Title: Forest plot

Legend: Association between self-rated health (per 10 point increase) and cardiovascular risk factors stratified by sex.

**Table 1.** Baseline clinical characteristics by tertiles of self-rated health

|                             | Tertiles of self-rated health   |                                 |                                 | P trend |
|-----------------------------|---------------------------------|---------------------------------|---------------------------------|---------|
|                             | 1 <sup>st</sup> tertile (n=231) | 2 <sup>nd</sup> tertile (n=226) | 3 <sup>rd</sup> tertile (n=117) |         |
|                             | 0 to 70                         | 71 to 90                        | 91 to 100                       |         |
| <b>Baseline</b>             |                                 |                                 |                                 |         |
| Age, years                  | 46 ± 16                         | 38 ± 13                         | 39 ± 15                         | <0.001  |
| Female, %                   | 154 (67%)                       | 127 (56%)                       | 69 (59%)                        | 0.06    |
| Self-reported race, %       |                                 |                                 |                                 | 0.51    |
| White                       | 33 (14%)                        | 24 (11%)                        | 20 (17%)                        |         |
| Mixed                       | 163 (71%)                       | 175 (77%)                       | 77 (66%)                        |         |
| Black                       | 32 (14%)                        | 26 (12%)                        | 18 (15%)                        |         |
| Indigenous                  | 2 (1%)                          | 1 (<1%)                         | 1 (1%)                          |         |
| BMI, kg/m <sup>2</sup>      | 28 ± 6                          | 27 ± 5                          | 26 ± 4                          | 0.002   |
| Abdominal circumference, cm | 90 ± 14                         | 87 ± 12                         | 84 ± 11                         | <0.001  |
| Asthma                      | 11 (5%)                         | 8 (4%)                          | 2 (2%)                          | 0.36    |
| COPD, %                     | 3 (1%)                          | 3 (1%)                          | 1 (1%)                          | 0.92    |
| History of MI, %            | 2 (1%)                          | 2 (1%)                          | 1 (1%)                          | 1.00    |
| Heart failure, %            | 3 (1%)                          | 2 (1%)                          | 0 (0%)                          | 0.47    |
| Rheumatic heart disease, %  | 7 (3%)                          | 7 (3%)                          | 4 (3%)                          | 0.97    |
| SBP, mmHg                   | 134 ± 20                        | 131 ± 20                        | 131 ± 19                        | 0.29    |
| DBP, mmHg                   | 83 ± 12                         | 81 ± 11                         | 82 ± 12                         | 0.17    |
| <b>Risk factors</b>         |                                 |                                 |                                 |         |
| Hypertension, %             | 66 (29%)                        | 32 (14%)                        | 14 (12%)                        | <0.001  |
| Hypercholesterolemia, %     | 52 (23%)                        | 23 (10%)                        | 14 (12%)                        | <0.001  |
| Diabetes, %                 | 21 (9%)                         | 6 (3%)                          | 6 (5%)                          | 0.012   |
| Obesity, %                  | 68 (29%)                        | 45 (20%)                        | 20 (17%)                        | 0.012   |
| Smoking, %                  | 106 (46%)                       | 65 (29%)                        | 46 (39%)                        | <0.001  |
| Healthy diet, %             | 87 (38%)                        | 130 (58%)                       | 59 (50%)                        | <0.001  |

|                                 |                  |                   |                  |        |
|---------------------------------|------------------|-------------------|------------------|--------|
| Physical activity, %            | 64 (28%)         | 94 (42%)          | 53 (45%)         | <0.001 |
| <b>Socioeconomic status</b>     |                  |                   |                  |        |
| Work status, %                  |                  |                   |                  | 0.09   |
| Employed                        | 77 (33%)         | 98 (43%)          | 53 (45%)         |        |
| Self-employed                   | 20 (9%)          | 23 (10%)          | 9 (8%)           |        |
| Other                           | 134 (58%)        | 105 (47%)         | 55 (47%)         |        |
| Family income, BRL              | 1250 [800, 2000] | 1500 [1000, 3000] | 1200 [800, 2000] | 0.11   |
| Rural living area, %            | 92 (40%)         | 78 (35%)          | 55 (47%)         | 0.08   |
| <b>Biochemistry</b>             |                  |                   |                  |        |
| Blood sugar, mg/dL              | 110 ± 74         | 100 ± 27          | 110 ± 49         | 0.10   |
| Bilirubin, mg/dL                | 0.40 ± 0.28      | 0.41 ± 0.24       | 0.41 ± 0.26      | 0.90   |
| Platelets, mm <sup>3</sup>      | 229 ± 76         | 240 ± 67          | 234 ± 66         | 0.28   |
| Leukocytes, mm <sup>3</sup>     | 6349 ± 1991      | 6383 ± 1723       | 6532 ± 1915      | 0.68   |
| Reticulocytes, %                | 0.75 ± 0.19      | 0.80 ± 0.22       | 0.77 ± 0.22      | 0.44   |
| Hemoglobin, g/dL                | 14 ± 1           | 14 ± 1            | 14 ± 1           | 0.13   |
| C-reactive protein, mg/L        | 2.1 ± 8          | 3.1 ± 12          | 3.6 ± 12         | 0.44   |
| Creatinine, mg/dL               | 0.9 [0.7, 1.0]   | 0.9 [0.7, 1.0]    | 0.8 [0.7, 1.0]   | 0.73   |
| INR                             | 1.02 ± 0.12      | 1.01 ± 0.10       | 1.02 ± 0.10      | 0.30   |
| <b>Echocardiography</b>         |                  |                   |                  |        |
| LV ejection fraction <45%, %    | 9 (4%)           | 6 (3%)            | 3 (3%)           | 0.69   |
| LV hypertrophy, %               | 9 (4%)           | 4 (2%)            | 4 (3%)           | 0.39   |
| Diastolic dysfunction, %        | 7 (3%)           | 5 (2%)            | 1 (1%)           | 0.43   |
| LV ejection fraction, %         | 57 ± 6           | 57 ± 5            | 58 ± 5           | 0.48   |
| LV mass index, g/m <sup>2</sup> | 71 ± 18          | 68 ± 17           | 70 ± 16          | 0.11   |
| E/e'                            | 7.3 ± 2.6        | 6.7 ± 2.1         | 6.9 ± 2.3        | 0.014  |
| E/A                             | 1.2 ± 0.5        | 1.3 ± 0.4         | 1.3 ± 0.4        | 0.003  |

|                                             |           |           |           |       |
|---------------------------------------------|-----------|-----------|-----------|-------|
| Left atrial volume index, mL/m <sup>2</sup> | 20 ± 6    | 19 ± 5    | 19 ± 4    | 0.025 |
| TR velocity, m/s                            | 2.3 ± 0.3 | 2.3 ± 0.3 | 2.3 ± 0.2 | 0.34  |

COPD: chronic obstructive pulmonary disease, SBP: systolic blood pressure, DBP: diastolic blood pressure, BMI: body mass index, INR: international normalized ratio, LV: left ventricular, TR: tricuspid regurgitation

For peer review only

**Table 2.**

Association between self-rated health (per 10 increase), cardiovascular risk factors and disease in the entire population (n=574)

|                                    | Unadjusted<br>odds ratio [95%CI] | P      | Adjusted<br>odds ratio [95%CI]* | P     | P<br>interaction<br>sex |
|------------------------------------|----------------------------------|--------|---------------------------------|-------|-------------------------|
| <b>Risk factors</b>                |                                  |        |                                 |       |                         |
| Hypertension                       | 0.77 [0.71 to 0.85]              | <0.001 | 0.87 [0.78 to 0.97]             | 0.011 | 0.005                   |
| Hypercholesterolemia               | 0.83 [0.75 to 0.91]              | <0.001 | 0.89 [0.80 to 0.99]             | 0.044 | 0.29                    |
| Diabetes                           | 0.84 [0.73 to 0.97]              | 0.021  | 1.02 [0.86 to 1.22]             | 0.80  | 0.17                    |
| Obesity                            | 0.90 [0.82 to 0.98]              | 0.017  | 0.95 [0.86 to 1.05]             | 0.30  | 0.78                    |
| Smoking                            | 0.86 [0.79 to 0.93]              | <0.001 | 0.96 [0.87 to 1.05]             | 0.39  | 0.003                   |
| Heathy diet                        | 1.11 [1.03 to 1.20]              | 0.008  | 1.13 [1.04 to 1.24]             | 0.004 | 0.002                   |
| Physical activity                  | 1.16 [1.06 to 1.26]              | 0.001  | 1.09 [0.99 to 1.20]             | 0.079 | <0.001                  |
| <b>Subclinical cardiac disease</b> |                                  |        |                                 |       |                         |
| LV ejection fraction <45%          | 0.88 [0.73 to 1.08]              | 0.22   | 0.97 [0.77 to 1.23]             | 0.82  | 0.88                    |
| LV hypertrophy                     | 0.87 [0.72 to 1.07]              | 0.19   | 0.97 [0.76 to 1.24]             | 0.81  | 0.31                    |
| Diastolic dysfunction              | 0.92 [0.75 to 1.15]              | 0.47   | 1.09 [0.85 to 1.40]             | 0.51  | 0.63                    |

\*Multivariable models were mutually adjusted other cardiovascular risk factors in addition to age, sex, work, family income, living area (rural/urban) and prior heart disease  
LV: left ventricular

**Table 3.**

Self-rated health (per 10 point increase) and echocardiographic parameters in the entire population (n=574)

|                                    | Unadjusted<br>beta [95%CI] | P      | Adjusted<br>beta [95%CI]* | P    |
|------------------------------------|----------------------------|--------|---------------------------|------|
| <b>Echocardiography</b>            |                            |        |                           |      |
| Left ventricular ejection fraction | 0.04 [-0.16 to 0.25]       | 0.67   | 0.04 [-0.17 to 0.25]      | 0.71 |
| Left ventricular mass index        | -0.46 [-1.12 to 0.21]      | 0.18   | 0.12 [-0.46 to 0.70]      | 0.69 |
| e'                                 | 0.40 [0.25 to 0.54]        | <0.001 | 0.06 [-0.04 to 0.15]      | 0.23 |
| E/e'                               | -0.16 [-0.25 to -0.07]     | 0.001  | 0.01 [-0.07 to 0.09]      | 0.76 |
| E/A                                | 0.03 [0.02 to 0.05]        | <0.001 | 0.01 [-0.01 to 0.01]      | 0.99 |
| Left atrial volume index           | -0.26 [-0.46 to -0.06]     | 0.012  | -0.05 [-0.22 to 0.13]     | 0.61 |
| Tricuspid regurgitation velocity   | -0.01 [-0.02 to -0.01]     | 0.21   | 0.01 [-0.01 to 0.1]       | 0.95 |

\*Multivariable models were adjusted for age, sex, work, family income, living area (rural/urban) and prior heart disease

e': mitral annular early diastolic velocity, E: early mitral inflow velocity, A; late mitral inflow velocity



Figure 1A-C

(A)

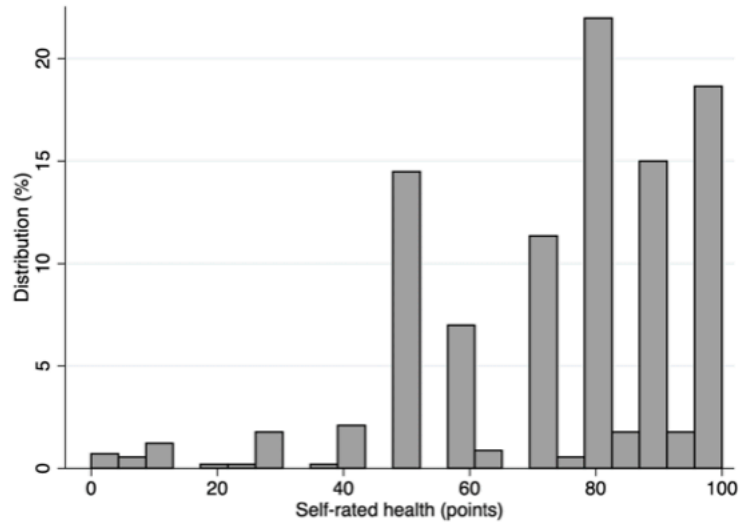

(B)

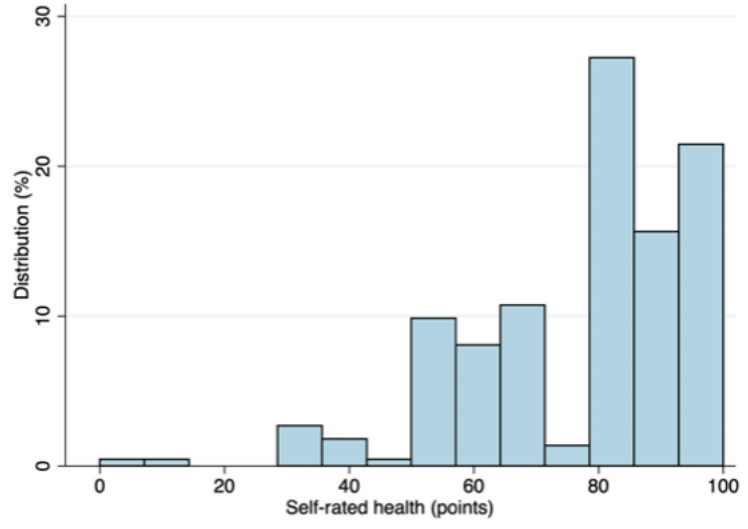

(C)

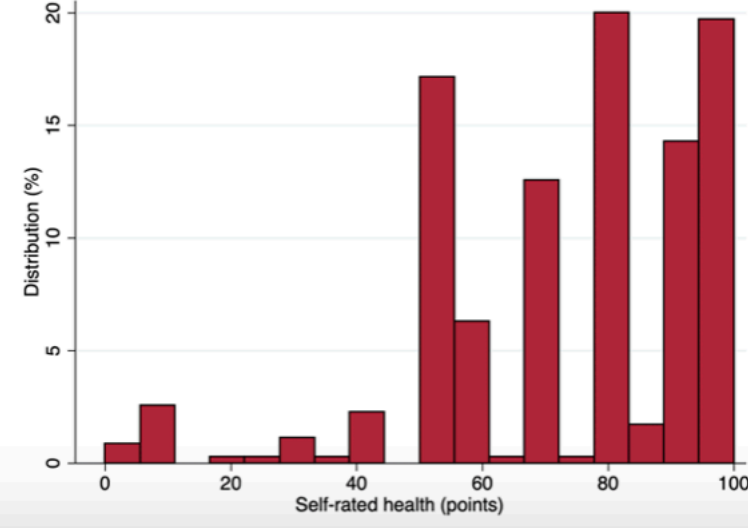

**Figure 2.**

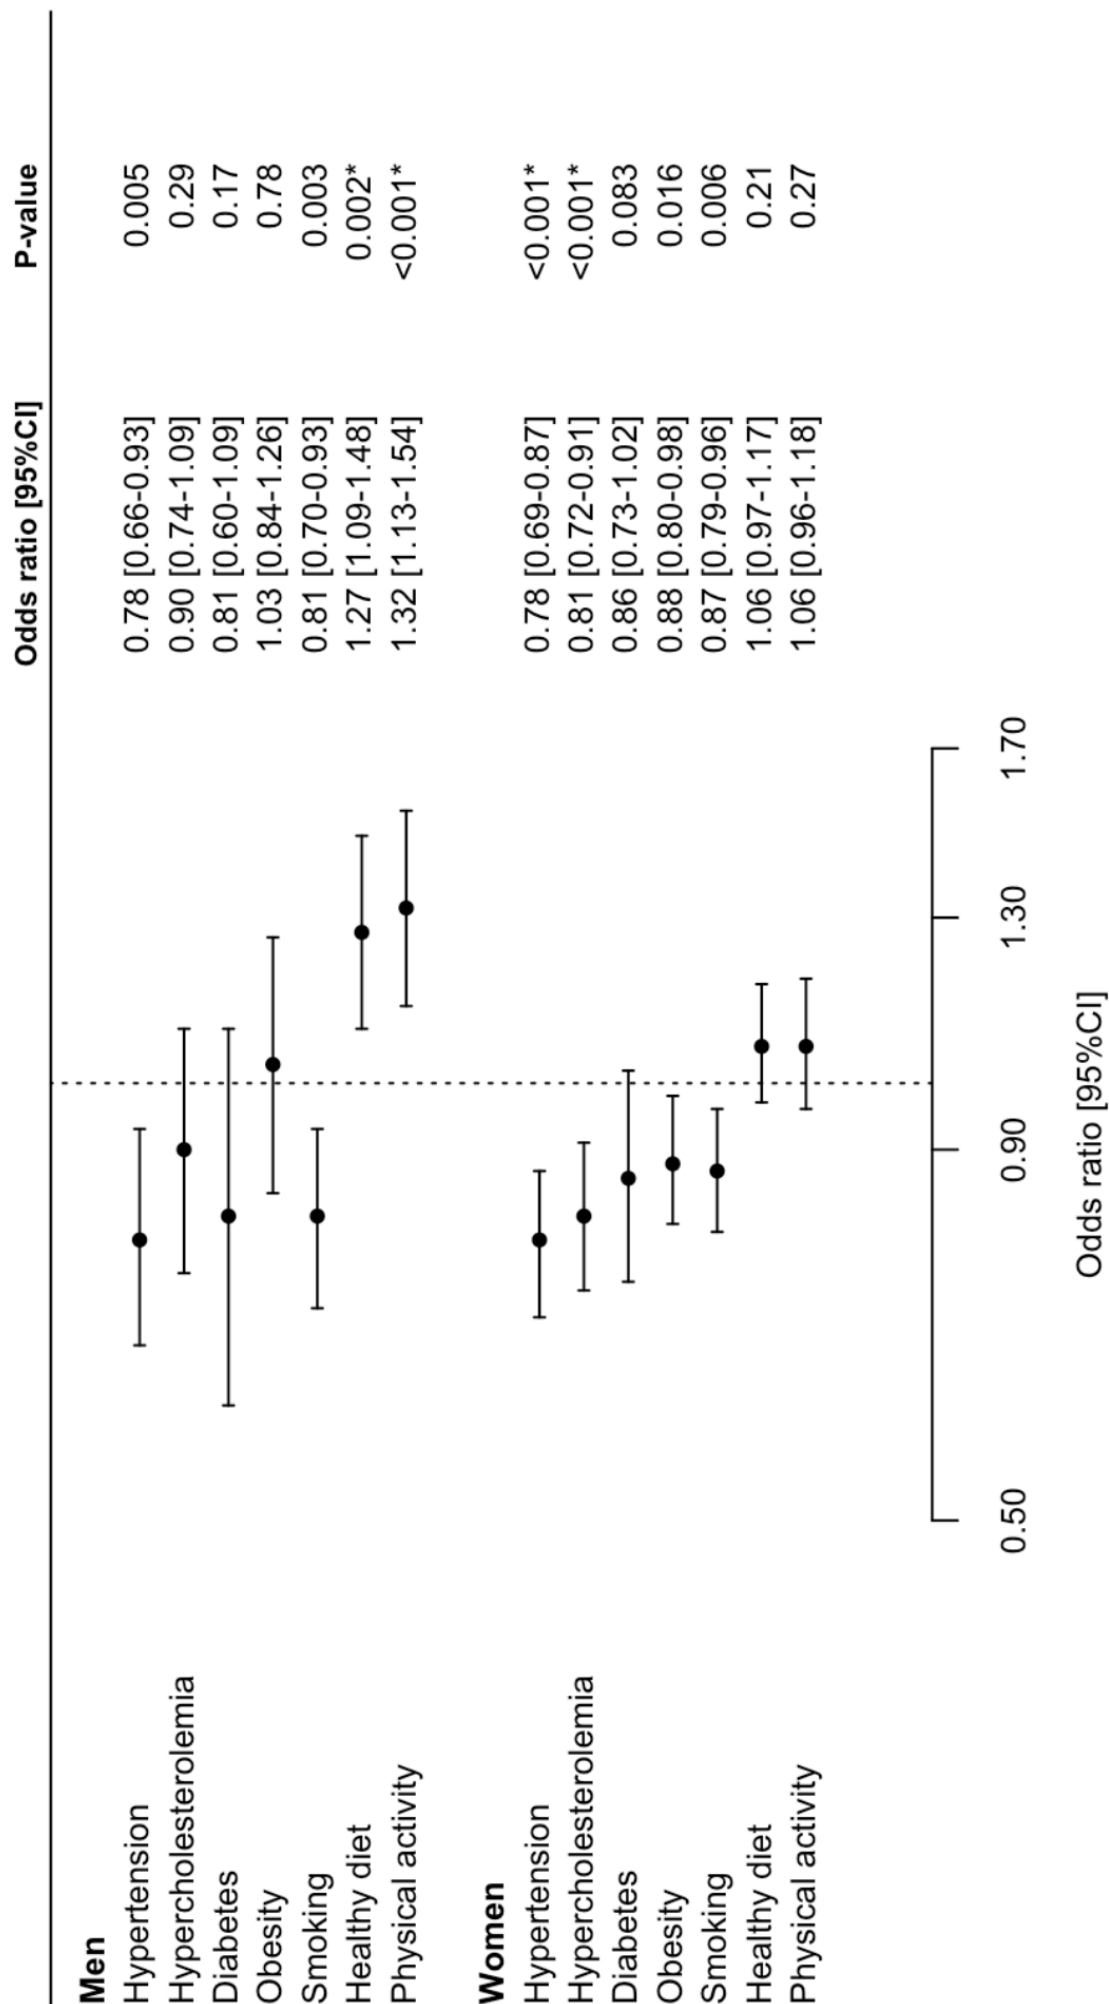

## Supplemental Data

### Is self-rated health associated with cardiovascular risk factors and disease in a low-income setting? A cross-sectional study from the Amazon Basin of Brazil

Anna E. Holm, MD; Laura Cordeiro Gomes; Alma Wegener, BSc; Karine O. Lima; Luan O. Matos; Isabelle V. M. Vieira; Molly D. Kaagaard; Manan Pareek, MD, PhD; Rodrigo Medeiros de Souza, PhD; Claudio Romero Farias Marinho, PhD; Tor Biering-Sørensen, MD, PhD, MPH; Odilson M. Silvestre, MD, PhD, MPH; Philip Brainin, MD, PhD

#### **Content**

|                                                                     |        |
|---------------------------------------------------------------------|--------|
| Supplemental Methods: Echocardiography.....                         | page 2 |
| Supplemental Table 1: Baseline clinical characteristics by sex..... | page 3 |

## Supplemental Methods: Echocardiography

End-diastolic dimensions of the left ventricle were obtained in the parasternal long axis view and measured at the level of the mitral valve leaflets. Left ventricular mass was accordingly calculated by the Devereux formula. End-diastolic and end-systolic volumes of the left ventricle were obtained in the apical two-chamber and four-chamber projections, allowing assessment of the left ventricular ejection fraction by the Simpson's biplane method. Left atrial volumes were measured by the area-length method in the same views and later divided by the body surface area to yield the left atrial volume index. In the apical four-chamber view we assessed mitral inflow velocities of early (E) and late (A) diastolic filling with pulsed wave Doppler and the deceleration time of the E-wave was measured. Pulsed wave color tissue Doppler imaging samples were placed above the septal and lateral mitral annulus to measure early diastolic velocity ( $e'$ ) of the left ventricle. In a focused right ventricular view, we assessed tricuspid regurgitation (TR) velocity by continuous wave doppler imaging.

**Table 1.** Baseline clinical characteristics by sex

|                              | Men<br>n=224      | Women<br>n=350   | P<br>difference |
|------------------------------|-------------------|------------------|-----------------|
| <b>Baseline</b>              |                   |                  |                 |
| Age, years                   | 40 ± 15           | 42 ± 15          | 0.28            |
| Race, %                      |                   |                  | 0.41            |
| White                        | 33 (15%)          | 44 (13%)         |                 |
| Mixed                        | 153 (68%)         | 262 (75%)        |                 |
| Black                        | 36 (16%)          | 40 (11%)         |                 |
| Indigenous                   | 1 (<1%)           | 3 (1%)           |                 |
| BMI, kg/m <sup>2</sup>       | 26 ± 4            | 28 ± 5           | 0.001           |
| Abdominal circumference, cm  | 87 ± 13           | 88 ± 13          | 0.45            |
| Asthma                       | 4 (2%)            | 17 (4%)          | 0.06            |
| COPD, %                      | 2 (1%)            | 5 (1%)           | 0.57            |
| History of MI, %             | 2 (1%)            | 3 (1%)           | 0.96            |
| Heart failure, %             | 3 (1%)            | 2 (1%)           | 0.33            |
| Rheumatic heart disease, %   | 8 (4%)            | 10 (3%)          | 0.18            |
| SBP, mmHg                    | 133 ± 16          | 131 ± 22         | 0.18            |
| DBP, mmHg                    | 82 ± 12           | 82 ± 12          | 0.73            |
| <b>Risk factors</b>          |                   |                  |                 |
| Hypertension, %              | 37 (17%)          | 75 (21%)         | 0.15            |
| Hypercholesterolemia, %      | 26 (12%)          | 63 (18%)         | 0.039           |
| Diabetes, %                  | 9 (4%)            | 24 (7%)          | 0.15            |
| Obesity, %                   | 31 (14%)          | 102 (29%)        | 0.001           |
| Smoking, %                   | 98 (44%)          | 119 (34%)        | 0.019           |
| Healthy diet, %              | 99 (44%)          | 177 (51%)        | 0.14            |
| Physical activity, %         | 107 (48%)         | 104 (30%)        | 0.001           |
| <b>Socioeconomic status</b>  |                   |                  |                 |
| Work status, %               |                   |                  | 0.001           |
| Employed                     | 70 (31%)          | 224 (64%)        |                 |
| Self-employed                | 125 (56%)         | 103 (29%)        |                 |
| Other                        | 29 (13%)          | 23 (7%)          |                 |
| Family income, BRL           | 1700 [1000, 2750] | 1200 [800, 2000] | 0.001           |
| Rural living area, %         | 99 (44%)          | 126 (36%)        | 0.050           |
| <b>Biochemistry</b>          |                   |                  |                 |
| Blood sugar, mg/dL           | 100 ± 24          | 110 ± 67         | 0.047           |
| Bilirubin, mg/dL             | 0.49 ± 0.32       | 0.35 ± 0.19      | 0.001           |
| Platelets, mm <sup>3</sup>   | 220 ± 81          | 244 ± 62         | 0.001           |
| Leukocytes, mm <sup>3</sup>  | 6040 ± 1590       | 6632 ± 2002      | 0.001           |
| Reticulocytes, %             | 0.75 ± 0.19       | 0.80 ± 0.22      | 0.44            |
| Hemoglobin, g/dL             | 15 ± 1            | 13 ± 1           | 0.001           |
| C-reactive protein, mg/L     | 2.2 ± 9.6         | 3.2 ± 11.2       | 0.59            |
| Creatinine, mg/dL            | 1.0 [0.8, 1.1]    | 0.8 [0.6, 1.0]   | 0.001           |
| INR                          | 1.03 ± 0.09       | 1.00 ± 0.11      | 0.001           |
| <b>Echocardiography</b>      |                   |                  |                 |
| LV ejection fraction <45%, % | 11 (4.9%)         | 7 (2.0%)         | 0.05            |
| LV hypertrophy, %            | 6 (2.7%)          | 11 (3.1%)        | 0.75            |
| Diastolic dysfunction, %     | 3 (1.3%)          | 13 (3.7%)        | 0.09            |

COPD: chronic obstructive pulmonary disease, SBP: systolic blood pressure, DBP: diastolic blood pressure, BMI: body mass index, INR: international normalized ratio, LV: left ventricular

STROBE Statement—Checklist of items that should be included in reports of *cross-sectional studies*

|                           | Item No | Recommendation                                                                                                                                                                                               | Page No |
|---------------------------|---------|--------------------------------------------------------------------------------------------------------------------------------------------------------------------------------------------------------------|---------|
| <b>Title and abstract</b> | 1       | (a) Indicate the study's design with a commonly used term in the title or the abstract                                                                                                                       | 1-2     |
|                           |         | (b) Provide in the abstract an informative and balanced summary of what was done and what was found                                                                                                          | 2-3     |
| <b>Introduction</b>       |         |                                                                                                                                                                                                              |         |
| Background/rationale      | 2       | Explain the scientific background and rationale for the investigation being reported                                                                                                                         | 4       |
| Objectives                | 3       | State specific objectives, including any prespecified hypotheses                                                                                                                                             | 4       |
| <b>Methods</b>            |         |                                                                                                                                                                                                              |         |
| Study design              | 4       | Present key elements of study design early in the paper                                                                                                                                                      | 5       |
| Setting                   | 5       | Describe the setting, locations, and relevant dates, including periods of recruitment, exposure, follow-up, and data collection                                                                              | 5       |
| Participants              | 6       | (a) Give the eligibility criteria, and the sources and methods of selection of participants                                                                                                                  | 5       |
| Variables                 | 7       | Clearly define all outcomes, exposures, predictors, potential confounders, and effect modifiers. Give diagnostic criteria, if applicable                                                                     | 6       |
| Data sources/measurement  | 8*      | For each variable of interest, give sources of data and details of methods of assessment (measurement). Describe comparability of assessment methods if there is more than one group                         | 6-7     |
| Bias                      | 9       | Describe any efforts to address potential sources of bias                                                                                                                                                    | 5       |
| Study size                | 10      | Explain how the study size was arrived at                                                                                                                                                                    | 5       |
| Quantitative variables    | 11      | Explain how quantitative variables were handled in the analyses. If applicable, describe which groupings were chosen and why                                                                                 | 6       |
| Statistical methods       | 12      | (a) Describe all statistical methods, including those used to control for confounding                                                                                                                        | 9-10    |
|                           |         | (b) Describe any methods used to examine subgroups and interactions                                                                                                                                          | 9-10    |
|                           |         | (c) Explain how missing data were addressed                                                                                                                                                                  | 9-10    |
|                           |         | (d) If applicable, describe analytical methods taking account of sampling strategy                                                                                                                           | N/A     |
|                           |         | (e) Describe any sensitivity analyses                                                                                                                                                                        | 9-10    |
| <b>Results</b>            |         |                                                                                                                                                                                                              |         |
| Participants              | 13*     | (a) Report numbers of individuals at each stage of study—eg numbers potentially eligible, examined for eligibility, confirmed eligible, included in the study, completing follow-up, and analysed            | 11      |
|                           |         | (b) Give reasons for non-participation at each stage                                                                                                                                                         | N/A     |
|                           |         | (c) Consider use of a flow diagram                                                                                                                                                                           | N/A     |
| Descriptive data          | 14*     | (a) Give characteristics of study participants (eg demographic, clinical, social) and information on exposures and potential confounders                                                                     | 11      |
|                           |         | (b) Indicate number of participants with missing data for each variable of interest                                                                                                                          | N/A     |
| Outcome data              | 15*     | Report numbers of outcome events or summary measures                                                                                                                                                         | 11-12   |
| Main results              | 16      | (a) Give unadjusted estimates and, if applicable, confounder-adjusted estimates and their precision (eg, 95% confidence interval). Make clear which confounders were adjusted for and why they were included | 11-12   |
|                           |         | (b) Report category boundaries when continuous variables were categorized                                                                                                                                    | N/A     |
|                           |         | (c) If relevant, consider translating estimates of relative risk into absolute risk for a meaningful time period                                                                                             | N/A     |
| Other analyses            | 17      | Report other analyses done—eg analyses of subgroups and interactions, and sensitivity analyses                                                                                                               | 12      |

1  
2  
3  
4  
5  
6  
7  
8  
9  
10  
11  
12  
13  
14  
15  
16  
17  
18  
19  
20  
21  
22  
23  
24  
25  
26  
27  
28  
29  
30  
31  
32  
33  
34  
35  
36  
37  
38  
39  
40  
41  
42  
43  
44  
45  
46  
47  
48  
49  
50  
51  
52  
53  
54  
55  
56  
57  
58  
59  
60

| <b>Discussion</b>        |    |                                                                                                                                                                            |       |
|--------------------------|----|----------------------------------------------------------------------------------------------------------------------------------------------------------------------------|-------|
| Key results              | 18 | Summarise key results with reference to study objectives                                                                                                                   | 13-15 |
| Limitations              | 19 | Discuss limitations of the study, taking into account sources of potential bias or imprecision. Discuss both direction and magnitude of any potential bias                 | 15-16 |
| Interpretation           | 20 | Give a cautious overall interpretation of results considering objectives, limitations, multiplicity of analyses, results from similar studies, and other relevant evidence | 16    |
| Generalisability         | 21 | Discuss the generalisability (external validity) of the study results                                                                                                      | 16    |
| <b>Other information</b> |    |                                                                                                                                                                            |       |
| Funding                  | 22 | Give the source of funding and the role of the funders for the present study and, if applicable, for the original study on which the present article is based              | 18    |

\*Give information separately for exposed and unexposed groups.

**Note:** An Explanation and Elaboration article discusses each checklist item and gives methodological background and published examples of transparent reporting. The STROBE checklist is best used in conjunction with this article (freely available on the Web sites of PLoS Medicine at <http://www.plosmedicine.org/>, Annals of Internal Medicine at <http://www.annals.org/>, and Epidemiology at <http://www.epidem.com/>). Information on the STROBE Initiative is available at [www.strobe-statement.org](http://www.strobe-statement.org).

# BMJ Open

## Is self-rated health associated with cardiovascular risk factors and disease in a low-income setting? A cross-sectional study from the Amazon Basin of Brazil

|                                 |                                                                                                                                                                                                                                                                                                                                                                                                                                                                                                                                                                                                                                                                                                                                                                                                                                                                                                                                                                                                                                                                                                                                                                                                                                                                                                                                                                                                                                                                                                                                 |
|---------------------------------|---------------------------------------------------------------------------------------------------------------------------------------------------------------------------------------------------------------------------------------------------------------------------------------------------------------------------------------------------------------------------------------------------------------------------------------------------------------------------------------------------------------------------------------------------------------------------------------------------------------------------------------------------------------------------------------------------------------------------------------------------------------------------------------------------------------------------------------------------------------------------------------------------------------------------------------------------------------------------------------------------------------------------------------------------------------------------------------------------------------------------------------------------------------------------------------------------------------------------------------------------------------------------------------------------------------------------------------------------------------------------------------------------------------------------------------------------------------------------------------------------------------------------------|
| Journal:                        | <i>BMJ Open</i>                                                                                                                                                                                                                                                                                                                                                                                                                                                                                                                                                                                                                                                                                                                                                                                                                                                                                                                                                                                                                                                                                                                                                                                                                                                                                                                                                                                                                                                                                                                 |
| Manuscript ID                   | bmjopen-2021-058277.R2                                                                                                                                                                                                                                                                                                                                                                                                                                                                                                                                                                                                                                                                                                                                                                                                                                                                                                                                                                                                                                                                                                                                                                                                                                                                                                                                                                                                                                                                                                          |
| Article Type:                   | Original research                                                                                                                                                                                                                                                                                                                                                                                                                                                                                                                                                                                                                                                                                                                                                                                                                                                                                                                                                                                                                                                                                                                                                                                                                                                                                                                                                                                                                                                                                                               |
| Date Submitted by the Author:   | 13-Jun-2022                                                                                                                                                                                                                                                                                                                                                                                                                                                                                                                                                                                                                                                                                                                                                                                                                                                                                                                                                                                                                                                                                                                                                                                                                                                                                                                                                                                                                                                                                                                     |
| Complete List of Authors:       | <p>Holm, Anna Engell; Gentofte Hospital, Department of Cardiology; Federal University of Acre, Multidisciplinary Center</p> <p>Gomes, Laura ; University of São Paulo Institute of Biomedical Sciences, Department of Parasitology</p> <p>Wegener, Alma; Gentofte Hospital, Department of Cardiology; Federal University of Acre, Multidisciplinary Center</p> <p>Lima, Karine ; Federal University of Acre, Multidisciplinary Center</p> <p>Matos, Luan; Federal University of Acre, Multidisciplinary Center</p> <p>Vieira, Isabelle ; Federal University of Acre, Multidisciplinary Center</p> <p>Kaagaard, Molly ; Gentofte Hospital, Department of Cardiology; Federal University of Acre, Multidisciplinary Center</p> <p>Pareek, Manan; Gentofte Hospital, Department of Cardiology; Yale-New Haven Hospital, Department of Internal Medicine, Yale New Haven Hospital, Yale University School of Medicine, New Haven, Connecticut, USA</p> <p>Medeiros de Souza, Rodrigo ; Federal University of Acre, Multidisciplinary Center</p> <p>Romero Farias Marinho, Claudio ; University of São Paulo Institute of Biomedical Sciences, Department of Parasitology</p> <p>Biering-Sorensen, Tor; Gentofte Hospital, Department of Cardiology; University of Copenhagen Department of Biomedical Sciences</p> <p>Silvestre, Odilson; Federal University of Acre, Health and Sport Science Center</p> <p>Brainin, Philip; Gentofte Hospital, Department of Cardiology; Federal University of Acre, Multidisciplinary Center</p> |
| <b>Primary Subject Heading</b>: | Global health                                                                                                                                                                                                                                                                                                                                                                                                                                                                                                                                                                                                                                                                                                                                                                                                                                                                                                                                                                                                                                                                                                                                                                                                                                                                                                                                                                                                                                                                                                                   |
| Secondary Subject Heading:      | Cardiovascular medicine, Public health, Epidemiology                                                                                                                                                                                                                                                                                                                                                                                                                                                                                                                                                                                                                                                                                                                                                                                                                                                                                                                                                                                                                                                                                                                                                                                                                                                                                                                                                                                                                                                                            |
| Keywords:                       | MENTAL HEALTH, CARDIOLOGY, PUBLIC HEALTH                                                                                                                                                                                                                                                                                                                                                                                                                                                                                                                                                                                                                                                                                                                                                                                                                                                                                                                                                                                                                                                                                                                                                                                                                                                                                                                                                                                                                                                                                        |
|                                 |                                                                                                                                                                                                                                                                                                                                                                                                                                                                                                                                                                                                                                                                                                                                                                                                                                                                                                                                                                                                                                                                                                                                                                                                                                                                                                                                                                                                                                                                                                                                 |

SCHOLARONE™  
Manuscripts



1  
2  
3  
4  
5  
6  
7  
8  
9  
10  
11  
12  
13  
14  
15  
16  
17  
18  
19  
20  
21  
22  
23  
24  
25  
26  
27  
28  
29  
30  
31  
32  
33  
34  
35  
36  
37  
38  
39  
40  
41  
42  
43  
44  
45  
46  
47  
48  
49  
50  
51  
52  
53  
54  
55  
56  
57  
58  
59  
60



I, the Submitting Author has the right to grant and does grant on behalf of all authors of the Work (as defined in the below author licence), an exclusive licence and/or a non-exclusive licence for contributions from authors who are: i) UK Crown employees; ii) where BMJ has agreed a CC-BY licence shall apply, and/or iii) in accordance with the terms applicable for US Federal Government officers or employees acting as part of their official duties; on a worldwide, perpetual, irrevocable, royalty-free basis to BMJ Publishing Group Ltd ("BMJ") its licensees and where the relevant Journal is co-owned by BMJ to the co-owners of the Journal, to publish the Work in this journal and any other BMJ products and to exploit all rights, as set out in our [licence](#).

The Submitting Author accepts and understands that any supply made under these terms is made by BMJ to the Submitting Author unless you are acting as an employee on behalf of your employer or a postgraduate student of an affiliated institution which is paying any applicable article publishing charge ("APC") for Open Access articles. Where the Submitting Author wishes to make the Work available on an Open Access basis (and intends to pay the relevant APC), the terms of reuse of such Open Access shall be governed by a Creative Commons licence – details of these licences and which [Creative Commons](#) licence will apply to this Work are set out in our licence referred to above.

Other than as permitted in any relevant BMJ Author's Self Archiving Policies, I confirm this Work has not been accepted for publication elsewhere, is not being considered for publication elsewhere and does not duplicate material already published. I confirm all authors consent to publication of this Work and authorise the granting of this licence.

# Is self-rated health associated with cardiovascular risk factors and disease in a low-income setting? A cross-sectional study from the Amazon Basin of Brazil

Short title: Self-rated health and cardiac disease in the Amazon

Anna E. Holm, MD<sup>1,2</sup>; Laura Cordeiro Gomes<sup>3</sup>; Alma Wegener, BSc<sup>1,2</sup>; Karine O. Lima<sup>1</sup>; Luan O. Matos<sup>1</sup>; Isabelle V. M. Vieira<sup>1</sup>; Molly D. Kaagaard<sup>1,2</sup>; Manan Pareek, MD, PhD<sup>2,4</sup>; Rodrigo Medeiros de Souza, PhD<sup>1</sup>; Claudio Romero Farias Marinho, PhD<sup>3</sup>; Tor Biering-Sørensen, MD, PhD, MPH<sup>2,5</sup>; Odilson M. Silvestre, MD, PhD, MPH<sup>6</sup>; Philip Brainin, MD, PhD<sup>1,2</sup>

1) Multidisciplinary Center, Federal University of Acre, Câmpus Floresta, Cruzeiro do Sul, Acre, Brazil

2) Department of Cardiology, Herlev-Gentofte University Hospital, Hellerup, Denmark

3) Department of Parasitology, Institute of Biomedical Sciences, University of São Paulo, São Paulo, Brazil

4) Department of Internal Medicine, Yale New Haven Hospital, Yale University School of Medicine, New Haven, Connecticut, USA

5) Faculty of Biomedical Sciences, Copenhagen University, Copenhagen, Denmark

6) Health and Sport Science Center, Federal University of Acre, Rio Branco, Acre, Brazil

**Conflicts of interest:** The authors report no conflicts of interest

## Corresponding author:

Philip Brainin, MD, PhD

Estrada do Canela Fina, Km 12, Gleba Formoso

Federal University of Acre, Multidisciplinary Center, Câmpus Floresta

Cruzeiro do Sul, Acre, Brazil - ZIP 69980-00 AC

Mail: denlillefilur@hotmail.com

Phone: +45 29425299

Total word count: 2,904 (excluding tables and references)

## Abstract

**Objective:** Prior studies have suggested that self-rated health may be a useful indicator of cardiovascular disease. Consequently, we aimed to assess the relationship between self-rated health, cardiovascular risk factors, and subclinical cardiac disease in the Amazon Basin.

**Setting:** Cross-sectional study where self-rated health was obtained according to a visual analogue scale, ranging from 0 (poor) to 100 (excellent). We performed questionnaires, physical examination, and echocardiography. Logistic and linear regression models were applied to assess self-rated health, cardiac risk factors and cardiac disease by echocardiography. Multivariable models were mutually adjusted for other cardiovascular risk factors, clinical and socioeconomic data, and known cardiac disease.

**Results:** A total of 574 participants (mean age 41 years, 61% female) provided information on self-rated health (mean  $75 \pm 21$  [interquartile range 60 to 90] points). Self-rated health (per 10-point increase) was negatively associated with hypertension (OR 0.87 [95%CI 0.78-0.97],  $P=0.01$ ), hypercholesterolemia (OR 0.89 [95%CI 0.80-0.99],  $P=0.04$ ) and positively with healthy diet (OR 1.13 [95%CI 1.04-1.24],  $P=0.004$ ). Sex modified these associations ( $P$ -interaction $<0.05$ ) such that higher self-rated health was associated with healthy diet and physical activity in men, and lower odds of hypertension and hypercholesterolemia in women. No relationship was found with left ventricular ejection fraction $<45\%$  (OR 0.88 [95%CI 0.73 to 1.08],  $P=0.22$ ), left ventricular hypertrophy (OR 0.89 [95%CI 0.78 to 1.02],  $P=0.09$ ), or diastolic dysfunction (OR 0.92 [95%CI 0.75 to 1.15],  $P=0.47$ ).

**Conclusion:** Self-rated health was positively associated with health parameters in the Amazon Basin, but not with subclinical cardiac disease by echocardiography. Our findings

1  
2  
3  
4 are of hypothesis generating nature and future studies should aim to determine whether  
5  
6 assessment of self-rated health may be useful for screening related to policymaking or  
7  
8 lifestyle interventions.  
9

10  
11  
12  
13 Words: 275

14  
15  
16 Keywords: self-rated health; cardiovascular risk factors; echocardiography, low and  
17  
18 middle-income countries  
19

## 20 21 22 23 **Article summary**

### 24 25 **Strengths and limitations**

- 26  
27 - This is the first study to examine self-rated health in a rural part of the Amazon  
28  
29 Basin of Brazil using an internationally recognized questionnaire, EQ-5D-5L.  
30  
31
- 32 - We applied a state-of-the-art echocardiographic imaging protocol to identify  
33  
34 underlying cardiovascular disease  
35
- 36 - Self-reported health behavior could be subject to social and cultural biases  
37
- 38 - Because no standard values of the EQ-5D-5L health instrument have been  
39  
40 published for Brazil, it is not possible to compare our findings with other  
41  
42 populations.  
43  
44
- 45 - The study design was cross-sectional.  
46  
47  
48  
49  
50  
51  
52  
53  
54  
55  
56  
57  
58  
59  
60

## Introduction

Cardiovascular disease is the leading cause of mortality worldwide and accounts for more than 31% of all deaths and 8% of public hospitalizations in Brazil [1,2]. Since the 1960s, Brazil has experienced a transition in health behavior and cardiovascular risk factors, where tobacco consumption has declined and obesity has increased [2]. Approximately 35% of Brazilian adults suffer from hypertension [3], the prevalence of diabetes mellitus is rising [4], and a high proportion of adults do not practice recommended levels of physical activity [2]. Differences in perception of risk factors and variability in access to healthcare unequivocally affect health behavior and the lifetime risk of cardiovascular disease. In this regard, self-rated health is widely used as a health indicator in various populations [5], is strongly associated with cardiovascular morbidity [6,7], and provides prognostic information on mortality [8]. Self-rated health and cardiovascular risk factors are also both influenced by sex [9,10]. Throughout the last decades, assessment of self-rated health has become increasingly important and is often used for healthcare surveillance and in policy making.

To understand whether self-rated health in future studies may be used to screen for cardiac disease in low-income settings, we aimed to investigate the relationship with cardiovascular risk factors and disease in the general population from the Amazon Basin of Brazil. We hypothesized that higher self-rated health is associated with less cardiovascular risk factors and disease, and that these relationships are modified by sex [11].

## Methods

### Study site

The study was conducted in the municipality of Cruzeiro do Sul, Acre (Northern Brazil; Amazon Basin). The prevalence for cardiovascular disease in Acre (5,815 per 100,000 inhabitants) is below the average rate for Brazil (6,025 per 100,000 inhabitants) and [12] the region is considered to be one of the poorest in Brazil and has one of the lowest population densities [13].

### Patient and Public Involvement

Patients or the public were not involved in the study design, recruitment to and conduct of the study nor reporting of results. All patients were informed of the results from their own examinations conducted in the study. Data will be made available upon reasonable request to the corresponding author.

### Sampling

This cross-sectional study was conducted as a part of the Malaria Heart Study (clinicaltrials.gov: NCT04445103). Participants from the general population were enrolled from June 2020 through December 2020. Through randomization, we selected 10 local healthcare clinics from Cruzeiro do Sul, equally distributed between rural and urban areas. Local healthcare agents provided lists of persons associated with each clinic, who we invited to participate in the study (Figure 1). We included persons  $\geq 18$  years old who

1  
2  
3  
4 completed the examination program and responded to all questionnaires. Exclusion  
5  
6  
7  
8 criteria were ongoing pregnancy, ongoing infection as assessed by examination of a  
9  
10  
11 medical doctor, and presence of *Plasmodium* in peripheral blood smears. A total of 504  
12  
13  
14 participants from the general population were included from healthcare clinics. As a part of  
15  
16  
17 the main study, we also examined patients diagnosed with uncomplicated malaria in  
18  
19 healthcare clinics. This group of participants underwent a follow-up examination a median  
20  
21 of 30 days later, when they had completed treatment and had no symptoms of malaria.  
22  
23 According to the above-mentioned inclusion and exclusion criteria, a total of 70  
24  
25  
26 participants from this group were eligible for inclusion (Figure 1).  
27  
28  
29  
30

### 31 **Data collection**

32  
33 Two different questionnaires were administered by trained interviewers (i.e., study  
34  
35 personnel). These interviewers also filled out the questionnaires. The first was the EQ-5D-  
36  
37 5L questionnaire which is validated in Brazilian Portuguese (study registration no.: 28276)  
38  
39 [14]. For the purpose of this study, we used data from the EQ visual analogue scale (EQ-  
40  
41 VAS) which provides a single estimate of self-rated health ranging from 0 to 100 points on  
42  
43 a continuous scale. Zero represents the worst possible self-rated health and 100  
44  
45 represents ideal health. The second questionnaire was used to gather information about  
46  
47 socioeconomic status, race, cardiovascular risk factors, known cardiac disease (prior  
48  
49 myocardial infarction and heart failure), and current medications. Race was self-reported,  
50  
51 and two persons did not answer this question. Afterwards, participants underwent a  
52  
53 physical examination to measure height, weight, and blood pressure. Fingertick point-of-  
54  
55 care blood draws were used to measure glucose levels and to obtain thick and thin blood  
56  
57  
58  
59  
60



1  
2  
3  
4 slides. Giemsa stained thick and thin blood slides were analyzed by two independent  
5  
6 microscopists to detect *Plasmodium*. A medical doctor (PB) evaluated all patients. None of  
7  
8 them displayed clinical signs or symptoms of heart disease (absence of shortness of  
9  
10 breath, chest pain, swelling of legs and irregular heart rhythm). All data was quality  
11  
12 controlled by PB on a daily basis.  
13  
14  
15  
16  
17

### 18 **Cardiovascular risk factors**

19  
20 We assessed seven different cardiovascular risk factors. Hypertension was defined as a  
21  
22 physician diagnosis of hypertension or intake of anti-hypertensive medication,  
23  
24 hypercholesterolemia as a physician diagnosis of dyslipidemia or intake of lipid lowering  
25  
26 medication, and diabetes as a physician diagnosis of diabetes or fasting blood glucose  
27  
28 >126mg/dL [15]. Body mass index (BMI) was calculated as: body weight  
29  
30 (kilograms)/height<sup>2</sup> (meters), and obesity was defined as BMI  $\geq 30$ kg/m<sup>2</sup>. Participants were  
31  
32 classified as smokers if they were current smokers or had previously smoked. A healthy  
33  
34 diet was defined as intake of any quantity of vegetables with a main meal  $\geq 3$  times/week.  
35  
36  
37  
38 Physical activity was defined as participation in any kind of physical activity, on a weekly  
39  
40  
41  
42  
43  
44  
45 basis, during leisure time. We did not apply any time limit or threshold.  
46  
47  
48  
49  
50  
51  
52  
53  
54

### 55 **Biochemistry**

56  
57  
58  
59  
60

1  
2  
3  
4 Field procedures: During examinations, we collected peripheral venous blood samples in  
5  
6 citrate, EDTA, and serum-separator tubes, which were cooled at 2-8°C. Citrate plasma  
7  
8 was immediately separated by centrifugation (12 minutes, 3200 rpm) in a mobile  
9  
10 laboratory and transferred to Eppendorf tubes.  
11

12  
13 Laboratory: Serum-separator tubes underwent centrifugation (10 min, 3000rpm) to extract  
14  
15 serum which was subsequently stored at -20°C in Eppendorf tubes. Laboratory analyses  
16  
17 were performed at Citolab and Centro de Diagnósticos, Cruzeiro do Sul, Acre, Brazil.  
18  
19 Using EDTA blood, a complete blood count with a differential was conducted (NX-350,  
20  
21 Sysmex, Japan; Citolab), and reticulocytes were counted manually (Citolab) [16]. Citrate  
22  
23 plasma was used to analyze coagulation parameters (Coagmaster 2.0, Wama  
24  
25 Diagnóstica, Brazil; Citolab). Serum was used to measure creatinine, bilirubin, and C-  
26  
27 reactive protein (Cobas c111, Roche Diagnostics, Switzerland; Citolab and Centro de  
28  
29 Diagnósticos). Analyses of C-reactive protein were only available in a subset of  
30  
31 participants (n=436).  
32  
33  
34  
35  
36  
37  
38

### 39 **Echocardiography**

40  
41 A single medical doctor either performed or supervised all echocardiographic examinations  
42  
43 (PB). Quality control was conducted on a frequent basis in a central imaging laboratory  
44  
45 (Herlev-Gentofte Hospital, Denmark) by an investigator certified in echocardiography by  
46  
47 the European Association of Cardiovascular Imaging. Examinations were performed  
48  
49 bedside (Vivid-IQ, GE Healthcare, Norway), and images were stored offline for analysis in  
50  
51 EchoPAC BT13 (v. 203.82). Analyses were conducted by AW according to contemporary  
52  
53 guidelines [17]. Rheumatic heart disease was assessed by PB according to the World  
54  
55 Heart Federation criteria [18]. We assessed three categories of subclinical left ventricular  
56  
57  
58  
59  
60

1  
2  
3  
4 (LV) cardiac disease: (i) reduced contractile function defined as LV ejection fraction <45%,  
5  
6 (ii) LV hypertrophy defined as LV mass index >115g/m<sup>2</sup> for men and >95g/m<sup>2</sup> for women  
7  
8 and (iii) diastolic dysfunction determined according to existing guidelines [19].  
9

10  
11 Classification of diastolic dysfunction involves assessment of early and late mitral inflow  
12  
13 velocity, mitral annular early diastolic velocity, tricuspid regurgitation velocity and the left  
14  
15 atrial volume index. Additional details are described in Supplemental Data 'Methods'.  
16  
17

## 18 19 20 **Ethics**

21  
22 The study was approved by the institutional review committee at Federal University of Acre  
23  
24 and University of São Paulo (CAAE: 26552619.6.0000.510 and 32947520.4.0000.5467),  
25  
26 local health care authorities and leaders of health care clinics. The study complies with the  
27  
28 2<sup>nd</sup> Declaration of Helsinki, and all patients provided written informed consent on oral and  
29  
30 written information given in Portuguese. Illiterate participants provided fingerprints instead  
31  
32 of signatures. For ethical reasons a medical doctor evaluated all participants on-site, and  
33  
34 in case of suspected heart disease participants were referred to a cardiologist.  
35  
36  
37

38  
39 Data from the study is available upon reasonable request to the senior author. Patients or  
40  
41 the public were not involved in the study design or reporting of results.  
42  
43  
44

## 45 46 **Statistics**

47  
48 Baseline characteristics for the study population were stratified according to tertiles of self-  
49  
50 rated health (cut-offs of 70 and 91 points) and sex. Due to the nature of the distribution,  
51  
52 tertiles of self-rated health did not contain equal amounts of participants. P for trend was  
53  
54 calculated using linear regression models and the Cuzick nonparametric test for trend [20].  
55  
56

57  
58 Differences between groups were compared using the chi-square test, Student's *t*-test,  
59  
60

1  
2  
3  
4 and the Wilcoxon rank-sum test, as appropriate. Histograms were conducted to display the  
5  
6 distribution of self-rated health. In all statistical tests, self-rated health was treated as a  
7  
8 continuous variable. Logistic regression models were conducted to examine the  
9  
10 relationship between self-rated health and cardiovascular risk factors and disease.  
11  
12 Multivariable models were adjusted for core variables: clinical data (age, sex, race),  
13  
14 socioeconomic data (work, family income, living area), known cardiac disease (prior  
15  
16 myocardial infarction, heart failure, rheumatic heart disease). Included variables were  
17  
18 selected based on prior studies of self-rated health [21–23] and were defined prior to  
19  
20 commencing data analyses. In addition, all associations with cardiovascular risk factors  
21  
22 were mutually adjusted for all other risk factors. Interactions with sex were also examined.  
23  
24 Family income was log-transformed to provide a normal distribution. The relationship  
25  
26 between self-rated health and (i) the sum of cardiac risk factors (hypertension,  
27  
28 hypercholesterolemia, diabetes, obesity, smoking) and (ii) echocardiographic parameters  
29  
30 were assessed in linear regression models, which were adjusted for the core variables. As  
31  
32 this was a secondary study, no sample size calculation was conducted. All analyses were  
33  
34 conducted in Stata v.14.2 (StataCorp, Texas, USA) and RStudio v.1.3 (R, Vienna, Austria).  
35  
36 Two-sided P-values <0.05 were considered statistically significant.  
37  
38  
39  
40  
41  
42  
43  
44  
45  
46  
47  
48  
49  
50  
51  
52  
53  
54  
55  
56  
57  
58  
59  
60

## Results

A total of 574 participants were assessed (mean age  $41 \pm 15$  years, 61% female). Mean self-rated health was  $75 \pm 21$  points (interquartile range 60 to 90 points) (Figure 2A). Four participants (<1%) reported 0 points, and 91 participants (16%) reported 100 points. The prevalences of cardiovascular risk factors were 20% for hypertension, 16% for hypercholesterolemia, 6% for diabetes, 23% for obesity, 38% for current or prior smoking, 52% for unhealthy diet, and 63% for absence of physical activity. Participants with lower self-rated health more frequently had all of the above risk factors and were older compared with participants with high self-rated health (P-trend<0.05; Table 1). No differences were observed in socioeconomic characteristics, biochemistry, or subclinical cardiac disease by echocardiography (reduced LV ejection fraction, hypertrophy, diastolic dysfunction) across tertiles of self-rated health (Table 1).

### Cardiovascular risk factors

In unadjusted logistic regression models, better self-rated health was significantly associated with lower odds of all cardiovascular risk factors (P<0.05 for all; Table 2). In adjusted models, self-rated health (per 10-point increase) was associated with lower odds of hypertension (OR 0.87 [95%CI 0.78 to 0.97], P=0.01), hypercholesterolemia (OR 0.89 [95%CI 0.80 to 0.99], P=0.04) and higher odds of healthy diet (OR 1.13 [95%CI 1.04 to 1.24], P=0.004). In multivariable models, better self-rated health was also associated with the sum of cardiovascular risk factors (beta = -0.07 per 10-point increase [95%CI -0.10 to -0.03], P<0.001). The associations remained unchanged when we excluded participants recently treated for malaria (Supplemental Table 1 and Supplemental Figure 1).

### **Subclinical cardiac disease by echocardiography**

No significant associations were found between self-rated health (per 10-point increase) and subclinical cardiac disease by echocardiography: LV ejection fraction <45% (OR 0.88 [95%CI 0.73 to 1.08], P= 0.22), LV hypertrophy (OR 0.87 [95%CI 0.72 to 1.07], P=0.19) or diastolic dysfunction (OR 0.92 [95%CI 0.75 to 1.15], P=0.47) (Table 2). No individual echocardiographic parameters were significantly associated with self-rated health in multivariable models (P>0.05 for all; Table 3).

### **Interactions with sex**

Self-rated health was higher in men than in women (77 vs 73 points) but the difference was not statistically significant (P=0.09) (Figure 2B-C). In general, women had higher body mass index, lower income, less frequently smoked, and were less physically active compared with men (P<0.05 for all; Supplemental Table 2). Sex modified the associations with hypertension, smoking, healthy diet, and physical activity, but not cardiac disease by echocardiography (Table 2). Unadjusted associations with cardiovascular risk factors, stratified by sex, are presented in Figure 3. For men, higher self-rated health (per 10-point increase) yielded greater odds of a healthy diet (adjusted OR 1.33 [95%CI 1.12 to 1.59], P=0.002) and physical activity (adjusted OR 1.24 [95%CI 1.03 to 1.50], P=0.02). For women, higher self-rated health (per 10-point increase) was associated with lower odds of hypertension (adjusted OR 0.85 [95%CI 0.74 to 0.97], P=0.016), and hypercholesterolemia (adjusted OR 0.87 [95%CI 0.76 to 0.99], P=0.046). The associations remained unchanged when we excluded participants from the malaria group (Supplemental Table 2 and Supplemental Figure 1).

## Discussion

This study has two principal findings. First, in a sample of the general population from the Amazon Basin, we found that self-rated health was significantly associated with cardiovascular risk factors and that these association were modified by sex. Second, self-rated health was not associated with cardiac disease assessed by echocardiography.

These findings indicate that in a low-income setting, self-rated health may to some extent provide information on cardiac risk profiles.

Self-rated health has previously been related to cardiovascular disease in various observational studies [24–26]. Higher self-rated health is related to a lower burden of cardiovascular risk factors (hypertension, hypercholesterolemia, diabetes, obesity), associations that persist after accounting for sociodemographic characteristics and baseline cardiac disease. Proposed mechanisms involve (i) chronic elevation of inflammatory cytokines ('immune-activated sickness') [27], (ii) a poorly balanced activation of the autonomous nervous system, and (iii) glucose levels [28]. Furthermore, self-rated health has been linked to subclinical cardiac alterations, e.g., elevated coronary artery calcium score [24], cardiac biomarkers [29], and reduced right ventricular function [30]. We found no associations with left or right ventricular echocardiographic parameters, possibly because our sample was derived from an overall healthy general population, participants were young (mean age 41 years), and echocardiographic alterations may possibly occur later in the cascade of cardiac pathology compared with elevated calcium scores and biomarkers. Another potential reason could be low statistical power due to the limited size of the study population.

1  
2  
3  
4 Importantly, women had somewhat lower self-rated health than men, and the relationship  
5  
6 with cardiovascular risk factors was further modified by sex. Both findings are in line with  
7  
8 previously published data [31–33]. While the mechanisms for this remain unknown,  
9  
10 women may be particularly sensitive to chronic health conditions, thus affecting self-rated  
11  
12 health [34]. Recent studies have demonstrated that the prevalence of cardiovascular  
13  
14 disease is higher in women, emphasizing that an appraisal of sex differences is necessary  
15  
16 to obtain maximum benefit of lifestyle interventions for the prevention of cardiac disease  
17  
18 [35].  
19  
20  
21  
22  
23  
24

25 Throughout the last decades, quality of life has been used as a tool to measure outcome  
26  
27 of healthcare interventions and guide healthcare policy making. Although self-rated health  
28  
29 represents a generic measure that encompasses many dimensions of health, and as such,  
30  
31 has limited sensitivity to address specific health issues, it is considered a reliable measure  
32  
33 to compare health in different populations and to evaluate disease burden [36]. Because  
34  
35 classic risk tools for cardiovascular disease do not capture social determinants, it has even  
36  
37 been argued that self-rated health, in addition to classic risk factors, may be more useful  
38  
39 for cardiovascular risk prediction. The EQ-5D visual analogue scale constitutes a widely  
40  
41 used tool for this purpose [14]. In the Amazon Basin, the average self-rated health score  
42  
43 was 75 points, which is lower compared to other studies from Brazil, where average  
44  
45 scores of 78 to 84 points have been reported [9,37]. Notably, none of these studies were  
46  
47 conducted in Northern Brazil, and the assessed populations were younger than our  
48  
49 sample. In addition, differences in cultural, regional, and disease patterns may partake in  
50  
51 understanding this difference, and further explain why general life expectancy in the  
52  
53 Amazon Basin is below the national average in Brazil [38].  
54  
55  
56  
57  
58  
59  
60



1  
2  
3  
4 Self-rated health relies on patient-centered care, which integrates the patient's  
5  
6 environment, values, and preferences, hence making it meaningful to the patient and the  
7  
8 treating clinician. It is a reproducible and consistent measure across different populations  
9  
10 and geographical regions [36], and it may potentially complement well-established risk  
11  
12 scoring models for cardiovascular disease [39]. Because self-rated health is easily  
13  
14 obtained, it can help to facilitate risk assessment strategies. This is particularly important in  
15  
16 areas such as the Amazon Basin where access to healthcare is highly variable and often  
17  
18 limited. Considering the close relationship we found with several cardiovascular risk  
19  
20 factors, self-rated health could be obtained by non-medical personnel and enable  
21  
22 screening of remote communities. Consequently, selected individuals, i.e., persons with  
23  
24 low self-rated health and no known cardiovascular risk factors, could be referred for risk  
25  
26 factor optimization in healthcare facilities. Furthermore, it could be used as a measure for  
27  
28 the effect of primary healthcare prevention strategies, similar to what has been reported  
29  
30 previously [40]. Whether self-rated health is linked to clinical outcomes in the Amazon  
31  
32 Basin, and if improvement in self-rated health could improve prognosis, should be  
33  
34 explored in future studies.  
35  
36  
37  
38  
39  
40  
41  
42

### 43 **Strengths and Limitations**

44  
45 Socioeconomic status is perceived to be associated with self-rated health and  
46  
47 cardiovascular risk factors [41,42], and despite our multivariable adjustment, residual  
48  
49 confounding may still exist. Interestingly, parameters of socioeconomic status did not vary  
50  
51 significantly across tertiles of self-reported health (Table 1), indicating that this relationship  
52  
53 may differ in this region. Health related behavior, including healthy diet and physical  
54  
55 activity, was self-reported and this could be associated with bias. Furthermore, it is a  
56  
57  
58  
59  
60

1  
2  
3  
4 limitation that the questionnaire for health behavior has not been validated in other studies  
5  
6 or settings. We adjusted our models for cardiac disease at baseline in an attempt to limit  
7  
8 reverse causation; however, some effect may persist. To reduce bias, we had a clear and  
9  
10 predefined hypothesis prior to commencing data analyses and a rigorous design for the  
11  
12 sequence of questionnaires. To increase the sample size, we included a subgroup of  
13  
14 participants recently treated for malaria (n=70). As this group was derived from the same  
15  
16 population, had no symptoms of malaria and all associations remained significant when  
17  
18 excluded, we do not believe its inclusion affects the generalizability of our results. Because  
19  
20 no standard data values of the EQ-5D-5L have been published in Brazil, we did not apply  
21  
22 data from the five dimensions of quality of life in this study, nor calculate index scores.  
23  
24 Data from this study represents an important first step in establishing EQ-5D-5L index  
25  
26 values for the rural parts of the Amazon basin. Reference values for the EQ-5D-3L [9]  
27  
28 have been published, but cross-walk datasets are not available. To avoid the inclusion of  
29  
30 white coat hypertension, we defined hypertension based on prior physician diagnosis  
31  
32 and/or intake of anti-hypertensive medication. While the generalizability of our findings to  
33  
34 other regions in the world may be disputed, the Amazon Basin covers eight other countries  
35  
36 in addition to Brazil. Hence, our findings are likely to be applicable to populations in these  
37  
38 areas or to populations who share similar environment and culture.  
39  
40  
41  
42  
43  
44  
45  
46  
47

## 48 **Conclusion**

49  
50 Self-rated health was positively associated with a healthy lifestyle, and this relationship  
51  
52 was modified by sex. Conversely, self-rated health was not associated with cardiac  
53  
54 disease by echocardiography. On a hypothesis-generating basis, healthcare policies could  
55  
56  
57  
58  
59  
60

1  
2  
3  
4 potentially utilize self-rated health for screening or as a target to improve health behavior.  
5  
6

7 Nevertheless, this should be investigated in future validation studies.  
8  
9  
10  
11  
12

### 13 **Acknowledgements**

14  
15  
16 We are thankful for the help and guidance from Dr. Suiane da Costa Negreiros do Valle  
17  
18 and Janaína Alencar.  
19  
20  
21

### 22 **Data availability statement**

23  
24 Data from the study is available upon reasonable request to the senior author. This  
25  
26 involves de-identified participant data and statistical analyses and plans.  
27  
28  
29  
30  
31  
32  
33  
34  
35  
36  
37  
38  
39  
40  
41  
42  
43  
44  
45  
46  
47  
48  
49  
50  
51  
52  
53  
54  
55  
56  
57  
58  
59  
60

## Funding

### Funding specifically rewarded for the Malaria Heart Study:

PB and AEH: Jette and Hans Henrik Jensen (No. N/A), The Independent Research Fund Denmark (0129-0003B), Dansk Medicinsk Selskab København (120620-kms), Julie von Müllens Fond (No. N/A), Knud Højgaards Fond (18-05-2487), A. P. Møllers Lægefond (18-L-0026), Reinholdt W. Jorck og Hustrus Fond (18-JU-0485), Eva og Henry Frænkels Mindefond (NLA-080919), Astra Zeneca/Danish Society of Cardiology (No. N/A), Internal Funds at Herlev-Gentofte Hospital (No. N/A), Torben og Alice Frimodts Fond (TA250419), Brorsons Fond (12038-1-hh), Lundbeckfonden (R373-2021-1201).

AW: Danish Heart Association (20-R139-A9644-22165), William Demant (20-1257), Knud Højgaards Fond (20-01-1076), Reinholdt W. Jorck og Hustrus Fond (20-JU-0145).

MK: Novo Nordisk Fonden (NNF20OC0062782).

LCG: CNPq (142306/2020-7).

### Other sources of funding:

CRFM: FAPESP (2020/06747-4) and CNPq (302917/2019-5).

No sponsors had any role in the design, conduction or analysis of the study.

## Contributor statement

AEH, TBS, OMS and PB were responsible for the conception of the study and research question. AEH and PB acquired funding to conduct the study. AEH, LCG and PB planned

1  
2  
3  
4 the study and facilitated logistics. AEH, LCG, LOM AW, KOL, IVMV, PB collected data  
5  
6 from the field and prepared collected samples in the laboratory. AEH, AW, MDK and PB  
7  
8 undertook data analyses while AEH conducted statistical analyses and wrote the  
9  
10 manuscript with support from PB. MP, RMS and CRF provided critical feedback for  
11  
12 interpretation of the data. All authors critically reviewed the study findings and read and  
13  
14 approved the final version before submission. PB is responsible for the overall content as  
15  
16 guarantor.  
17  
18  
19  
20  
21  
22  
23

### **Ethics approval statement**

24  
25  
26  
27 This study involves human participants and was approved by an Ethics Committee. Ethics  
28  
29 committee at Federal University of Acre and University of São Paulo (CAAE:  
30  
31 26552619.6.0000.510 and 32947520.4.0000.5467)  
32  
33  
34  
35  
36  
37

### **Disclosures**

38  
39  
40 The authors report no conflicts of interest.  
41  
42  
43  
44  
45  
46  
47  
48  
49  
50  
51  
52  
53  
54  
55  
56  
57  
58  
59  
60

## References

- 1 Roth, G.A.; Mensah, G.A.; Johnson, C.O.; Addolorato, G.; Ammirati, E.; Baddour, L.M.; Barengo, N.C.; Beaton, A.Z.; Benjamin, E.J.; Benziger C.P.; et al. Global Burden of Cardiovascular Diseases and Risk Factors, 1990–2019: Update From the GBD 2019 Study. *J Am Coll Cardiol* **2020**, *76*, 2982–3021, doi:10.1016/J.JACC.2020.11.010
- 2 Ribeiro, A.L.P.; Duncan, B.B.; Brant, L.C.C.; Lotufo, P.A.; Mill, J.G.; Barreto, S.M. Cardiovascular Health in Brazil Trends and Perspectives. *Circulation* **2016**, *133*, 422–433, doi:10.1161/CIRCULATIONAHA.114.008727.
- 3 Chor, D.; Pinho Ribeiro, A.L.; Sá Carvalho, M.; Duncan, B.B.; Andrade Lotufo, P.; Araújo Nobre, A.; De Aquino, E.M.L.L.; Schmidt, M.I.; Griep, R.H.; Molina, M.D.C.B.; et al. Prevalence, awareness, treatment and influence of socioeconomic variables on control of high blood pressure: Results of the ELSA-Brasil study. *PLoS One* **2015**, *10*, 1–14, doi:10.1371/journal.pone.0127382.
- 4 Ministério da Saúde. *Vigitel Brasil 2019*. 2020. ISBN 9788533427655.
- 5 Hosseinpoor, A.R.; Stewart Williams, J.; Amin, A.; Araujo de Carvalho, I.; Beard, J.; Boerma, T.; Kowal, P.; Naidoo, N.; Chatterji, S. Social determinants of self-reported health in women and men: Understanding the role of gender in population health. *PLoS One* **2012**, *7*, doi:10.1371/journal.pone.0034799.
- 6 van der Linde, R.M.; Mavaddat, N.; Luben, R.; Brayne, C.; Simmons, R.K.; Khaw, K.T.; Kinmonth, A.L. Self-Rated Health and Cardiovascular Disease Incidence: Results from a Longitudinal Population-Based Cohort in Norfolk, UK. *PLoS One* **2013**, *8*, 2–9, doi:10.1371/journal.pone.0065290.
- 7 Møller, L.; Kristensen, T.S.; Hollnagel, H. Self rated health as a predictor of coronary

1  
2  
3  
4  
5  
6  
7  
8  
9  
10  
11  
12  
13  
14  
15  
16  
17  
18  
19  
20  
21  
22  
23  
24  
25  
26  
27  
28  
29  
30  
31  
32  
33  
34  
35  
36  
37  
38  
39  
40  
41  
42  
43  
44  
45  
46  
47  
48  
49  
50  
51  
52  
53  
54  
55  
56  
57  
58  
59  
60

heart disease in Copenhagen, Denmark. *J Epidemiol Community Health* **1996**, *50*, 423–428, doi:10.1136/jech.50.4.423.

8 Idler, E.L.; Benyamini, Y. Self-Rated Health and Mortality: A Review of Twenty-  
Seven Community Studies. *J Health Soc Behav* **1997**, *38*, 21–37,  
doi:10.2307/2955359.

9 Santos, M.; Monteiro, A.L.; Santos, B. EQ-5D Brazilian population norms. *Health  
Qual Life Outcomes* **2021**, *19*, 1–7, doi:10.1186/s12955-021-01671-6.10

Gonçalves, R.P.F.; Haikal, D.S.; Freitas, M.I. de F.; Machado, Í.E.; Malta, D.C. Self-  
reported medical diagnosis of heart disease and associated risk factors: National  
health survey. *Rev Bras Epidemiol* **2019**, *22*, doi:10.1590/1980-  
549720190016.supl.2.

11 Boerma, T.; Hosseinpoor, A.R.; Verdes, E.; Chatterji, S. A global assessment of the  
gender gap in self-reported health with survey data from 59 countries. *BMC Public  
Health* **2016**, *16*, 1–9, doi:10.1186/s12889-016-3352-y.

12 Oliveira, G.M.M.; Brant, L.C.C.; Polanczyk, C.A.; Biolo, A.; Nascimento, B.R.; Malta,  
D.C.; Souza, M.F.M.; Soares, G.P.; Junior, G.F.X.; Machline-Carrion, M.J.; et al.  
Cardiovascular Statistics – Brazil 2020. *Arq Bras Cardiol* **2020**, *115*, 308–439.

13 Paim, J.; Travassos, C.; Almeida, C.; Bahia, L.; MacInko, J. The Brazilian health  
system: History, advances, and challenges. *Lancet* **2011**, *377*, 1778–1797,  
doi:10.1016/S0140-6736(11)60054-8.

14 EuroQol. EQ-5D-5L questionnaire in Brazilian Portuguese. [https://euroqol.org/eq-5d-  
instruments/](https://euroqol.org/eq-5d-instruments/) (accessed 29 May 2022).

15 American Diabetes Association. 2. Classification and Diagnosis of Diabetes:  
Standards of Medical Care in Diabetes, 2020. *Diabetes Care* **2020**, *43*, 14–31,

1  
2  
3  
4  
5  
6  
7  
8  
9  
10  
11  
12  
13  
14  
15  
16  
17  
18  
19  
20  
21  
22  
23  
24  
25  
26  
27  
28  
29  
30  
31  
32  
33  
34  
35  
36  
37  
38  
39  
40  
41  
42  
43  
44  
45  
46  
47  
48  
49  
50  
51  
52  
53  
54  
55  
56  
57  
58  
59  
60

doi:10.2337/dc20-S002.

- 16 Simionatto, M.; De Paula, J.P.; Chaves, M.A.F.; Bortoloso, M.; Cicchetti, D.; Leonart, M.S.S.; Do Nascimento, A.J. Manual and automated reticulocyte counts. *Hematology* **2010**, *15*, 406–409, doi:10.1179/102453310X12647083621128.
- 17 Lang, R.M.; Badano, L.P.; Mor-Avi, V.; Afilalo, J.; Armstrong, A.; Ernande, L.; Flachskampf, F.A.; Foster, E.; Goldstein, S.A.; Kuznetsova, T.; et al. Recommendations for cardiac chamber quantification by echocardiography in adults: An update from the American Society of Echocardiography and the European Association of Cardiovascular Imaging. *J Am Soc Echocardiogr* **2015**, *28*, 1-39.e14, doi:10.1016/j.echo.2014.10.003.18 Reméanyi, B.; Wilson, N.; Steer, A.; Ferreira, B.; Kado, J.; Kumar, K.; Lawrenson, J.; Maguire, G.; Marijon, E.; Mirabel, M.; et al. World Heart Federation criteria for echocardiographic diagnosis of rheumatic heart disease-an evidence-based guideline. *Nat Rev Cardiol* **2012**, *9*, 297–309, doi:10.1038/nrcardio.2012.7.19 Nagueh, S.F.; Smiseth, O.A.; Appleton, C.P.; Byrd, B.F.; Dokainish, H.; Edvardsen, T.; Flachskampf, F.A.; Gillebert, T.C.; Klein, A.L.; Lancellotti, P.; et al. Recommendations for the evaluation of left ventricular diastolic function by echocardiography: An update from the American society of echocardiography and the European association of cardiovascular imaging. *Eur Heart J Cardiovasc Imaging* **2016**, *17*, 1321–1360, doi:10.1093/ehjci/jew082.
- 20 Cuzick J. A wilcoxon-type test for trend. *Stat Med* **1985**, *4*, 87–90, doi:10.1002/sim.4780040112
- 21 Gafarov, V.; Panov, D.; Gromova, E.; Krymov, E.; Gagulin, I.; Gafarova, A. Sex differences and trends of self-rated health in population aged 25-64 years from 1988



1  
2  
3  
4  
5  
6  
7  
8  
9  
10  
11  
12  
13  
14  
15  
16  
17  
18  
19  
20  
21  
22  
23  
24  
25  
26  
27  
28  
29  
30  
31  
32  
33  
34  
35  
36  
37  
38  
39  
40  
41  
42  
43  
44  
45  
46  
47  
48  
49  
50  
51  
52  
53  
54  
55  
56  
57  
58  
59  
60

- to 2017. *Eur J Public Health* **2021**, 31, doi:10.1093/EURPUB/CKAB165.231
- 22 Achdut, N.; Sarid, O. Socio-economic status, self-rated health and mental health: The mediation effect of social participation on early-late midlife and older adults. *Isr J Health Policy Res* **2020**, 9, 1–12, doi:10.1186/S13584-019-0359-8/FIGURES/2
- 23 Dong, W.; Wan, J.; Xu, Y.; Chen, C.; Bai, G.; Fang, L.; Sun, A.; Yang, Y.; Wang, Y. Determinants of self-rated health among Shanghai elders: A cross-sectional study. *BMC Public Health* **2017**, 17, 1–12, doi:10.1186/S12889-017-4718-5/TABLES/5
- 24 Orimoloye, O.A.; Mirbolouk, M.; Uddin, S.M.I.; Dardari, Z.A.; Miedema, M.D.; Al-Mallah, M.H.; Yeboah, J.; Blankstein, R.; Nasir, K.; Blaha, M.J. Association between Self-rated Health, Coronary Artery Calcium Scores, and Atherosclerotic Cardiovascular Disease Risk: The Multi-Ethnic Study of Atherosclerosis (MESA). *JAMA Netw Open* **2019**, 2, 1–11, doi:10.1001/jamanetworkopen.2018.8023.
- 25 Dong, W.; Pan, X.F.; Yu, C.; Lv, J.; Guo, Y.; Bian, Z.; Yang, L.; Chen, Y.; Wu, T.; Chen, Z.; et al. Self-Rated Health Status and Risk of Ischemic Heart Disease in the China Kadoorie Biobank Study: A Population-Based Cohort Study. *J Am Heart Assoc* **2017**, 6, doi:10.1161/JAHA.117.006595.
- 26 Korhonen, P.E.; Kautiainen, H.; Mäntyselkä, P. Screening for cardiovascular risk factors and self-rated health in a community setting: A cross-sectional study in Finland. *Br J Gen Pract* **2014**, 64, e611–e615, doi:10.3399/bjgp14X681769.
- 27 Lekander, M.; Elofsson, S.; Neve, I.M.; Hansson, L.O.; Uden, A.L. Self-rated health is related to levels of circulating cytokines. *Psychosom Med* **2004**, 66, 559–563, doi:10.1097/01.psy.0000130491.95823.94.
- 28 Jarczok, M.N.; Kleber, M.E.; Koenig, J.; Loerbroks, A.; Herr, R.M.; Hoffmann, K.; Fischer, J.E.; Benyamini, Y.; Thayer, J.F. Investigating the associations of self-rated

- 1  
2  
3  
4 health: Heart rate variability is more strongly associated than inflammatory and other  
5 frequently used biomarkers in a cross sectional occupational sample. *PLoS One*  
6  
7 **2015**, *10*, 1–19, doi:10.1371/journal.pone.0117196.  
8  
9  
10  
11 29 Kananen, L.; Enroth, L.; Raitanen, J.; Jylhävä, J.; Bürkle, A.; Moreno-Villanueva, M.;  
12 Bernhardt, J.; Toussaint, O.; Grubeck-Loebenstein, B.; Malavolta, M.; et al. Self-  
13 rated health in individuals with and without disease is associated with multiple  
14 biomarkers representing multiple biological domains. *Sci Rep* **2021**, *11*, 1–14,  
15 doi:10.1038/s41598-021-85668-7.  
16  
17  
18  
19  
20  
21  
22  
23 30 Liu, Y.-T.; Lai, J.-Z.; Zhai, F.-F.; Han, F.; Zhou, L.-X.; Ni, J.; Yao, M.; Tian, Z.; Zhu,  
24 Y.-L.; Chen, W.; et al. Right ventricular systolic function is associated with health-  
25 related quality of life: a cross-sectional study in community-dwelling populations. *Ann*  
26 *Transl Med* **2021**, *9*, 640–640, doi:10.21037/atm-20-6845.  
27  
28  
29  
30  
31  
32 31 Rutledge, T.; Linke, S.E.; Johnson, B.D.; Bittner, V.; Krantz, D.S.; Whittaker, K.S.;  
33 Eastwood, J.A.; Eteiba, W.; Cornell, C.E.; Pepine, C.J.; et al. Self-rated versus  
34 objective health indicators as predictors of major cardiovascular events: The NHLBI-  
35 sponsored women's ischemia syndrome evaluation. *Psychosom Med* **2010**, *72*,  
36 549–555, doi:10.1097/PSY.0b013e3181dc0259.  
37  
38  
39  
40  
41  
42  
43  
44 32 de Mendonça Freire, L.; Dalamaria, T.; de Aquino Cunha, M.; de Souza, O.F. Self-  
45 Rated Health in University Students from Rio Branco in the Western Brazilian  
46 Amazon. *Health (Irvine Calif)* **2014**, *06*, 2245–2249, 33 Schmidt, M. Predictors  
47 of self-rated health and lifestyle behaviours in Swedish university students. *Glob J*  
48 *Health Sci* **2012**, *4*, 1–14, doi:10.5539/gjhs.v4n4p1.  
49  
50  
51  
52  
53  
54  
55 34 Shadbolt, B. Some Correlates of Self-Rated Health. *Am J Public Health* **1997**, *87*,  
56 951–960.  
57  
58  
59  
60

1  
2  
3  
4  
5  
6  
7  
8  
9  
10  
11  
12  
13  
14  
15  
16  
17  
18  
19  
20  
21  
22  
23  
24  
25  
26  
27  
28  
29  
30  
31  
32  
33  
34  
35  
36  
37  
38  
39  
40  
41  
42  
43  
44  
45  
46  
47  
48  
49  
50  
51  
52  
53  
54  
55  
56  
57  
58  
59  
60

- 35 Appelman, Y.; van Rijn, B.B.; ten Haaf, M.E.; Boersma, E.; Peters, S.A.E. Sex differences in cardiovascular risk factors and disease prevention. *Atherosclerosis* **2014**, *241*, 211–218, doi:10.1016/j.atherosclerosis.2015.01.027.
- 36 Salomon, J.A.; Tandon, A.; Murray, C.J.L. Comparability of self rated health: cross sectional multi-country survey using anchoring vignettes. *BMJ* **2004**, *328*, 258-261, doi:10.1136/bmj.37963.691632.44.
- 37 Menezes, R. de M.; Andrade, M.V.; Noronha, K.V.M. de S.; Kind, P. EQ-5D-3L as a health measure of Brazilian adult population. *Qual Life Res* **2015**, *24*, 2761–2776, doi:10.1007/s11136-015-0994-7.
- 38 Marinho, F.; de Azeredo Passos, V.M.; Carvalho Malta, D.; Barboza França, E.; Abreu, D.M.X.; Araújo, V.E.M.; Bustamante-Teixeira, M.T.; Camargos, P.A.M.; da Cunha, C.C.; Duncan, B.B.; et al. Burden of disease in Brazil, 1990–2016: a systematic subnational analysis for the Global Burden of Disease Study 2016. *Lancet* **2018**, *392*, 760–775, doi:10.1016/S0140-6736(18)31221-2.
- 39 May, M.; Lawlor, D.A.; Brindle, P.; Patel, R.; May, M. Cardiovascular disease risk assessment in older women: can we improve on Framingham? British Women's Heart and Health prospective cohort study. *Heart* **2006**, *92*, 1396-1401, doi:10.1136/hrt.2005.085381.
- 40 Denman, C.A.; Bell, M.L.; Cornejo, E.; De Zapien, J.G.; Carvajal, S.; Rosales, C. Changes in health behaviors and self-rated health of participants in Meta Salud: A primary prevention intervention of NCD in Mexico. *Glob Heart* **2015**, *10*, 55–61, doi:10.1016/j.gheart.2014.12.007.
- 41 McFadden, E.; Luben, R.; Wareham, N.; Bingham, S.; Khaw, K.T. Occupational social class, risk factors and cardiovascular disease incidence in men and women: a

1  
2  
3  
4 prospective study in the European Prospective Investigation of Cancer and Nutrition  
5 in Norfolk (EPIC-Norfolk) cohort. *Eur J Epidemiol* **2008**, *23*, 449-458,  
6  
7 doi:10.1007/s10654-008-9262-2.  
8  
9

10  
11 42 Kaplan, G.A.; Keil, J.E. Socioeconomic Factors and Cardiovascular Disease: A  
12 Review of the Literature. *Circulation* **1993**, *88*, 1973-1998,  
13  
14 doi:10.1161/01.cir.88.4.1973  
15  
16  
17  
18  
19  
20  
21  
22  
23  
24  
25  
26  
27  
28  
29  
30  
31  
32  
33  
34  
35  
36  
37  
38  
39  
40  
41  
42  
43  
44  
45  
46  
47  
48  
49  
50  
51  
52  
53  
54  
55  
56  
57  
58  
59  
60

1  
2  
3  
4  
5  
6  
7  
8  
9  
10  
11  
12  
13  
14  
15  
16  
17  
18  
19  
20  
21  
22  
23  
24  
25  
26  
27  
28  
29  
30  
31  
32  
33  
34  
35  
36  
37  
38  
39  
40  
41  
42  
43  
44  
45  
46  
47  
48  
49  
50  
51  
52  
53  
54  
55  
56  
57  
58  
59  
60

## Figure legends

### Figure 1.

Title: Flowchart

Legend: Inclusion of the study population in Cruzeiro do Sul, Acre.

### Figure 2A-C.

Title: Histograms of self-rated health

Legend: Distribution of self-rated health in the (A) entire study population (n=574), (B) in men (n=224) and (C) in women (n=350).

### Figure 3.

Title: Forest plot

Legend: Association between self-rated health (per 10 point increase) and cardiovascular risk factors stratified by sex. \* indicates that the association persisted to be significant in multivariable models.

**Table 1.** Baseline clinical characteristics by tertiles of self-rated health

|                             | Tertiles of self-rated health   |                                 |                                 | P trend* |
|-----------------------------|---------------------------------|---------------------------------|---------------------------------|----------|
|                             | 1 <sup>st</sup> tertile (n=231) | 2 <sup>nd</sup> tertile (n=226) | 3 <sup>rd</sup> tertile (n=117) |          |
|                             | 0 to 70                         | 71 to 90                        | 91 to 100                       |          |
| <b>Baseline</b>             |                                 |                                 |                                 |          |
| Age, years                  | 46 ± 16                         | 38 ± 13                         | 39 ± 15                         | <0.001   |
| Female, %                   | 154 (67%)                       | 127 (56%)                       | 69 (59%)                        | 0.06     |
| Self-reported race, %       |                                 |                                 |                                 | 0.51     |
| White                       | 33 (14%)                        | 24 (11%)                        | 20 (17%)                        |          |
| Mixed                       | 163 (71%)                       | 175 (77%)                       | 77 (66%)                        |          |
| Black                       | 32 (14%)                        | 26 (12%)                        | 18 (15%)                        |          |
| Indigenous                  | 2 (1%)                          | 1 (<1%)                         | 1 (1%)                          |          |
| BMI, kg/m <sup>2</sup>      | 28 ± 6                          | 27 ± 5                          | 26 ± 4                          | 0.002    |
| Abdominal circumference, cm | 90 ± 14                         | 87 ± 12                         | 84 ± 11                         | <0.001   |
| Asthma                      | 11 (5%)                         | 8 (4%)                          | 2 (2%)                          | 0.36     |
| COPD, %                     | 3 (1%)                          | 3 (1%)                          | 1 (1%)                          | 0.92     |
| History of MI, %            | 2 (1%)                          | 2 (1%)                          | 1 (1%)                          | 1.00     |
| Heart failure, %            | 3 (1%)                          | 2 (1%)                          | 0 (0%)                          | 0.47     |
| Rheumatic heart disease, %  | 7 (3%)                          | 7 (3%)                          | 4 (3%)                          | 0.97     |
| SBP, mmHg                   | 134 ± 20                        | 131 ± 20                        | 131 ± 19                        | 0.29     |
| DBP, mmHg                   | 83 ± 12                         | 81 ± 11                         | 82 ± 12                         | 0.17     |
| <b>Risk factors</b>         |                                 |                                 |                                 |          |
| Hypertension, %             | 66 (29%)                        | 32 (14%)                        | 14 (12%)                        | <0.001   |
| Hypercholesterolemia, %     | 52 (23%)                        | 23 (10%)                        | 14 (12%)                        | <0.001   |
| Diabetes, %                 | 21 (9%)                         | 6 (3%)                          | 6 (5%)                          | 0.012    |
| Obesity, %                  | 68 (29%)                        | 45 (20%)                        | 20 (17%)                        | 0.012    |
| Smoking, %                  | 106 (46%)                       | 65 (29%)                        | 46 (39%)                        | <0.001   |

|                                 |                  |                   |                  |        |
|---------------------------------|------------------|-------------------|------------------|--------|
| Healthy diet, %                 | 87 (38%)         | 130 (58%)         | 59 (50%)         | <0.001 |
| Physical activity, %            | 64 (28%)         | 94 (42%)          | 53 (45%)         | <0.001 |
| <b>Socioeconomic status</b>     |                  |                   |                  |        |
| Work status, %                  |                  |                   |                  | 0.09   |
| Employed                        | 77 (33%)         | 98 (43%)          | 53 (45%)         |        |
| Self-employed                   | 20 (9%)          | 23 (10%)          | 9 (8%)           |        |
| Other                           | 134 (58%)        | 105 (47%)         | 55 (47%)         |        |
| Family income, BRL              | 1250 [800, 2000] | 1500 [1000, 3000] | 1200 [800, 2000] | 0.11   |
| Rural living area, %            | 92 (40%)         | 78 (35%)          | 55 (47%)         | 0.08   |
| <b>Biochemistry</b>             |                  |                   |                  |        |
| Blood sugar, mg/dL              | 110 ± 74         | 100 ± 27          | 110 ± 49         | 0.10   |
| Bilirubin, mg/dL                | 0.3 [0.2, 0.5]   | 0.4 [0.2, 0.5]    | 0.4 [0.2, 0.5]   | 0.55   |
| Platelets, mm <sup>3</sup>      | 229 ± 76         | 240 ± 67          | 234 ± 66         | 0.28   |
| Leukocytes, mm <sup>3</sup>     | 6349 ± 1991      | 6383 ± 1723       | 6532 ± 1915      | 0.68   |
| Reticulocytes, %                | 0.75 ± 0.19      | 0.80 ± 0.22       | 0.77 ± 0.22      | 0.44   |
| Hemoglobin, g/dL                | 14 ± 1           | 14 ± 1            | 14 ± 1           | 0.13   |
| C-reactive protein, mg/L        | 0 [0, 0]         | 0 [0, 0]          | 0 [0, 0]         | 0.44   |
| Creatinine, mg/dL               | 0.9 ± 0.3        | 0.9 ± 0.2         | 0.9 ± 0.2        | 0.59   |
| INR                             | 1.02 ± 0.12      | 1.01 ± 0.10       | 1.02 ± 0.10      | 0.30   |
| <b>Echocardiography</b>         |                  |                   |                  |        |
| LV ejection fraction <45%, %    | 9 (4%)           | 6 (3%)            | 3 (3%)           | 0.69   |
| LV hypertrophy, %               | 9 (4%)           | 4 (2%)            | 4 (3%)           | 0.39   |
| Diastolic dysfunction, %        | 7 (3%)           | 5 (2%)            | 1 (1%)           | 0.43   |
| LV ejection fraction, %         | 57 ± 6           | 57 ± 5            | 58 ± 5           | 0.48   |
| LV mass index, g/m <sup>2</sup> | 71 ± 18          | 68 ± 17           | 70 ± 16          | 0.11   |
| E/e'                            | 7.3 ± 2.6        | 6.7 ± 2.1         | 6.9 ± 2.3        | 0.014  |

|                                             |           |           |           |       |
|---------------------------------------------|-----------|-----------|-----------|-------|
| E/A                                         | 1.2 ± 0.5 | 1.3 ± 0.4 | 1.3 ± 0.4 | 0.003 |
| Left atrial volume index, mL/m <sup>2</sup> | 20 ± 6    | 19 ± 5    | 19 ± 4    | 0.025 |
| TR velocity, m/s                            | 2.3 ± 0.3 | 2.3 ± 0.3 | 2.3 ± 0.2 | 0.34  |

COPD: chronic obstructive pulmonary disease, SBP: systolic blood pressure, DBP: diastolic blood pressure, BMI: body mass index, INR: international normalized ratio, LV: left ventricular, TR: tricuspid regurgitation  
 \*P for trend was calculated using linear regression models for normally distributed variables and Cuzick's nonparametric test for trend for non-normally distributed variables.

Normally distributed variables are displayed as mean ± standard deviation.

Non-normally distributed variables are presented as median [interquartile range].

Proportions are displayed as n (%).

For peer review only



**Table 2.**

Association between self-rated health (per 10 increase), cardiovascular risk factors and disease in the entire population (n=574)

|                                    | Unadjusted<br>odds ratio [95%CI] | P      | Adjusted<br>odds ratio [95%CI]* | P     | P<br>interaction<br>sex |
|------------------------------------|----------------------------------|--------|---------------------------------|-------|-------------------------|
| <b>Risk factors</b>                |                                  |        |                                 |       |                         |
| Hypertension                       | 0.77 [0.71 to 0.85]              | <0.001 | 0.87 [0.78 to 0.97]             | 0.011 | 0.005                   |
| Hypercholesterolemia               | 0.83 [0.75 to 0.91]              | <0.001 | 0.89 [0.80 to 0.99]             | 0.044 | 0.29                    |
| Diabetes                           | 0.84 [0.73 to 0.97]              | 0.021  | 1.02 [0.86 to 1.22]             | 0.80  | 0.17                    |
| Obesity                            | 0.90 [0.82 to 0.98]              | 0.017  | 0.95 [0.86 to 1.05]             | 0.30  | 0.78                    |
| Smoking                            | 0.86 [0.79 to 0.93]              | <0.001 | 0.96 [0.87 to 1.05]             | 0.39  | 0.003                   |
| Healthy diet                       | 1.11 [1.03 to 1.20]              | 0.008  | 1.13 [1.04 to 1.24]             | 0.004 | 0.002                   |
| Physical activity                  | 1.16 [1.06 to 1.26]              | 0.001  | 1.09 [0.99 to 1.20]             | 0.079 | <0.001                  |
| <b>Subclinical cardiac disease</b> |                                  |        |                                 |       |                         |
| LV ejection fraction <45%          | 0.88 [0.73 to 1.08]              | 0.22   | 0.97 [0.77 to 1.23]             | 0.82  | 0.88                    |
| LV hypertrophy                     | 0.87 [0.72 to 1.07]              | 0.19   | 0.97 [0.76 to 1.24]             | 0.81  | 0.31                    |
| Diastolic dysfunction              | 0.92 [0.75 to 1.15]              | 0.47   | 1.09 [0.85 to 1.40]             | 0.51  | 0.63                    |

\*Multivariable models were mutually adjusted for cardiovascular risk factors (hypertension, hypercholesterolemia, diabetes, obesity, smoking, healthy diet, physical activity) in addition to age, sex, work, family income, living area (rural/urban) and prior heart disease  
LV: left ventricular

**Table 3.**

Self-rated health (per 10 point increase) and echocardiographic parameters in the entire population (n=574)

|                                    | Unadjusted<br>beta [95%CI] | P      | Adjusted<br>beta [95%CI]* | P    |
|------------------------------------|----------------------------|--------|---------------------------|------|
| <b>Echocardiography</b>            |                            |        |                           |      |
| Left ventricular ejection fraction | 0.04 [-0.16 to 0.25]       | 0.67   | 0.04 [-0.17 to 0.25]      | 0.71 |
| Left ventricular mass index        | -0.46 [-1.12 to 0.21]      | 0.18   | 0.12 [-0.46 to 0.70]      | 0.69 |
| e'                                 | 0.40 [0.25 to 0.54]        | <0.001 | 0.06 [-0.04 to 0.15]      | 0.23 |
| E/e'                               | -0.16 [-0.25 to -0.07]     | 0.001  | 0.01 [-0.07 to 0.09]      | 0.76 |
| E/A                                | 0.03 [0.02 to 0.05]        | <0.001 | 0.01 [-0.01 to 0.01]      | 0.99 |
| Left atrial volume index           | -0.26 [-0.46 to -0.06]     | 0.012  | -0.05 [-0.22 to 0.13]     | 0.61 |
| Tricuspid regurgitation velocity   | -0.01 [-0.02 to -0.01]     | 0.21   | 0.01 [-0.01 to 0.1]       | 0.95 |

\*Multivariable models were adjusted for age, sex, work, family income, living area (rural/urban) and prior heart disease

e': mitral annular early diastolic velocity, E: early mitral inflow velocity, A; late mitral inflow velocity

1  
2  
3  
4  
5  
6  
7  
8  
9  
10  
11  
12  
13  
14  
15  
16  
17  
18  
19  
20  
21  
22  
23  
24  
25  
26  
27  
28  
29  
30  
31  
32  
33  
34  
35  
36  
37  
38  
39  
40  
41  
42  
43  
44  
45  
46  
47  
48  
49  
50  
51  
52  
53  
54  
55  
56  
57  
58  
59  
60

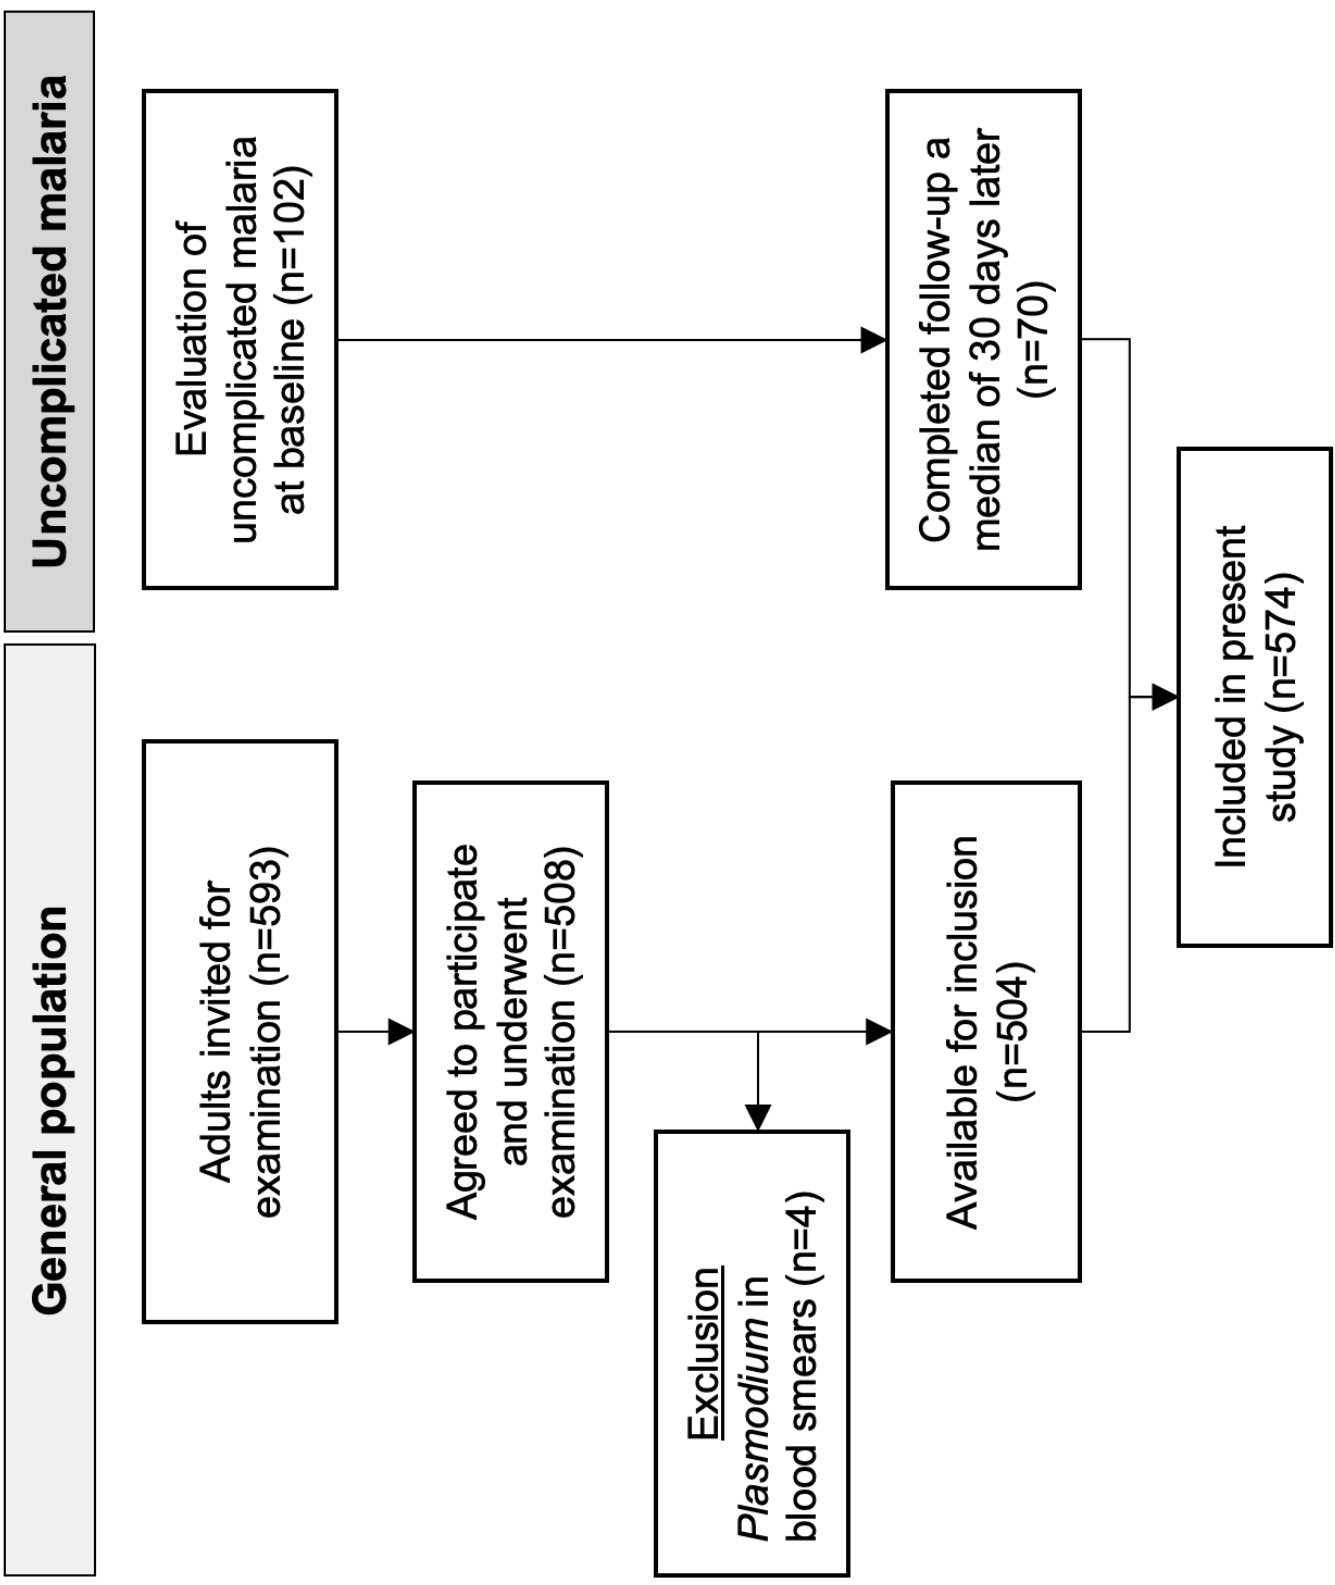

**Figure 1.**

Figure 2A-C

(A)



(B)



(C)



Figure 3.

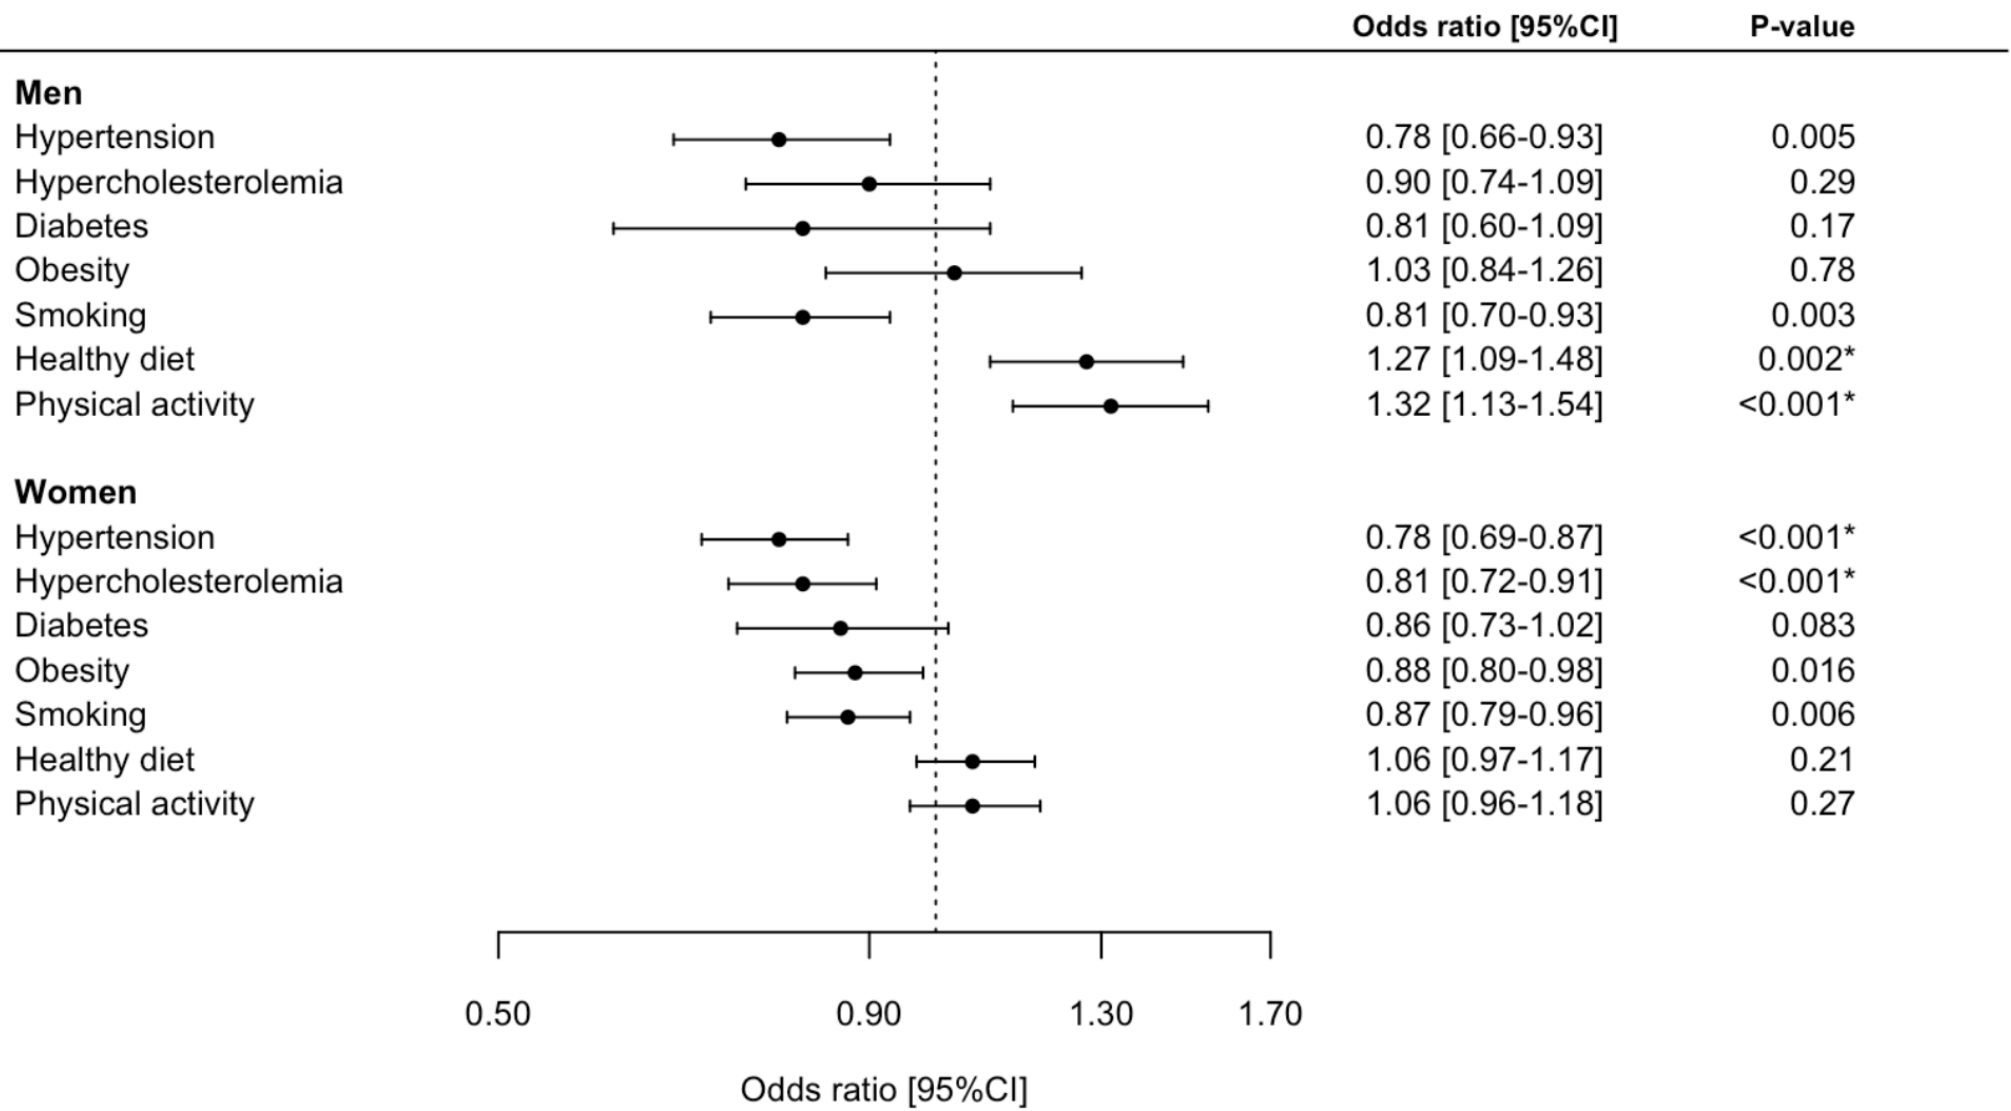

## Supplemental Data

### Is self-rated health associated with cardiovascular risk factors and disease in a low-income setting? A cross-sectional study from the Amazon Basin of Brazil

Anna E. Holm, MD; Laura Cordeiro Gomes; Alma Wegener, BSc; Karine O. Lima; Luan O. Matos; Isabelle V. M. Vieira; Molly D. Kaagaard; Manan Pareek, MD, PhD; Rodrigo Medeiros de Souza, PhD; Claudio Romero Farias Marinho, PhD; Tor Biering-Sørensen, MD, PhD, MPH; Odilson M. Silvestre, MD, PhD, MPH; Philip Brainin, MD, PhD

#### **Content**

|                                                                           |        |
|---------------------------------------------------------------------------|--------|
| Supplemental Methods: Echocardiography.....                               | page 2 |
| Supplemental Table 1: Baseline clinical characteristics by sex.....       | page 3 |
| Supplemental Table 2: Sensitivity analysis without malaria patients.....  | page 4 |
| Supplemental Figure 1: Sensitivity analysis without malaria patients..... | page 5 |

## Supplemental Methods: Echocardiography

End-diastolic dimensions of the left ventricle were obtained in the parasternal long axis view and measured at the level of the mitral valve leaflets. Left ventricular mass was accordingly calculated by the Devereux formula. End-diastolic and end-systolic volumes of the left ventricle were obtained in the apical two-chamber and four-chamber projections, allowing assessment of the left ventricular ejection fraction by the Simpson's biplane method. Left atrial volumes were measured by the area-length method in the same views and later divided by the body surface area to yield the left atrial volume index. In the apical four-chamber view we assessed mitral inflow velocities of early (E) and late (A) diastolic filling with pulsed wave Doppler and the deceleration time of the E-wave was measured. Pulsed wave color tissue Doppler imaging samples were placed above the septal and lateral mitral annulus to measure early diastolic velocity ( $e'$ ) of the left ventricle. In a focused right ventricular view, we assessed tricuspid regurgitation (TR) velocity by continuous wave doppler imaging.

**Supplemental Table 1. Baseline clinical characteristics by sex**

|                             | Men<br>n=224      | Women<br>n=350   | P<br>difference* |
|-----------------------------|-------------------|------------------|------------------|
| <b>Baseline</b>             |                   |                  |                  |
| Age, years                  | 40 ± 15           | 42 ± 15          | 0.28             |
| Race, %                     |                   |                  | 0.41             |
| White                       | 33 (15%)          | 44 (13%)         |                  |
| Mixed                       | 153 (68%)         | 262 (75%)        |                  |
| Black                       | 36 (16%)          | 40 (11%)         |                  |
| Indigenous                  | 1 (<1%)           | 3 (1%)           |                  |
| BMI, kg/m <sup>2</sup>      | 26 ± 4            | 28 ± 5           | 0.001            |
| Abdominal circumference, cm | 87 ± 13           | 88 ± 13          | 0.45             |
| Asthma                      | 4 (2%)            | 17 (4%)          | 0.06             |
| COPD, %                     | 2 (1%)            | 5 (1%)           | 0.57             |
| History of MI, %            | 2 (1%)            | 3 (1%)           | 0.96             |
| Heart failure, %            | 3 (1%)            | 2 (1%)           | 0.33             |
| Rheumatic heart disease, %  | 8 (4%)            | 10 (3%)          | 0.18             |
| SBP, mmHg                   | 133 ± 16          | 131 ± 22         | 0.18             |
| DBP, mmHg                   | 82 ± 12           | 82 ± 12          | 0.73             |
| <b>Risk factors</b>         |                   |                  |                  |
| Hypertension, %             | 37 (17%)          | 75 (21%)         | 0.15             |
| Hypercholesterolemia, %     | 26 (12%)          | 63 (18%)         | 0.039            |
| Diabetes, %                 | 9 (4%)            | 24 (7%)          | 0.15             |
| Obesity, %                  | 31 (14%)          | 102 (29%)        | 0.001            |
| Smoking, %                  | 98 (44%)          | 119 (34%)        | 0.019            |
| Healthy diet, %             | 99 (44%)          | 177 (51%)        | 0.14             |
| Physical activity, %        | 107 (48%)         | 104 (30%)        | 0.001            |
| <b>Socioeconomic status</b> |                   |                  |                  |
| Work status, %              |                   |                  | 0.001            |
| Employed                    | 70 (31%)          | 224 (64%)        |                  |
| Self-employed               | 125 (56%)         | 103 (29%)        |                  |
| Other                       | 29 (13%)          | 23 (7%)          |                  |
| Family income, BRL          | 1700 [1000, 2750] | 1200 [800, 2000] | 0.001            |
| Rural living area, %        | 99 (44%)          | 126 (36%)        | 0.050            |
| <b>Biochemistry</b>         |                   |                  |                  |
| Blood sugar, mg/dL          | 100 ± 24          | 110 ± 67         | 0.047            |
| Bilirubin, mg/dL            | 0.4 [0.3, 0.6]    | 0.3 [0.2, 0.4]   | <0.001           |
| Platelets, mm <sup>3</sup>  | 220 ± 81          | 244 ± 62         | 0.001            |
| Leukocytes, mm <sup>3</sup> | 6040 ± 1590       | 6632 ± 2002      | 0.001            |
| Reticulocytes, %            | 0.75 ± 0.19       | 0.80 ± 0.22      | 0.44             |
| Hemoglobin, g/dL            | 15 ± 1            | 13 ± 1           | 0.001            |
| C-reactive protein, mg/L    | 0 [0, 0]          | 0 [0, 0]         | 0.59             |
| Creatinine, mg/dL           | 1.0 ± 0.3         | 0.8 ± 0.2        | <0.001           |
| INR                         | 1.03 ± 0.09       | 1.00 ± 0.11      | 0.001            |
| <b>Echocardiography</b>     |                   |                  |                  |
| LV ejection fraction<45%, % | 11 (4.9%)         | 7 (2.0%)         | 0.05             |
| LV hypertrophy, %           | 6 (2.7%)          | 11 (3.1%)        | 0.75             |
| Diastolic dysfunction, %    | 3 (1.3%)          | 13 (3.7%)        | 0.09             |

COPD: chronic obstructive pulmonary disease, SBP: systolic blood pressure, DBP: diastolic blood pressure, BMI: body mass index, INR: international normalized ratio, LV: left ventricular



1  
2  
3  
4  
5  
6  
7  
8  
9  
10  
11  
12  
13  
14  
15  
16  
17  
18  
19  
20  
21  
22  
23  
24  
25  
26  
27  
28  
29  
30  
31  
32  
33  
34  
35  
36  
37  
38  
39  
40  
41  
42  
43  
44  
45  
46  
47  
48  
49  
50  
51  
52  
53  
54  
55  
56  
57  
58  
59  
60

\*P difference was calculated using the chi-square test, Student's *t*-test, and the Wilcoxon rank-sum test.  
Normally distributed variables are displayed as mean ± standard deviation.  
Non-normally distributed variables are presented as median [interquartile range].  
Proportions are displayed as n (%).

For peer review only

**Supplemental Table 2.**

Association between self-rated health (per 10-point increase), cardiovascular risk factors and disease in the study population excluding recently treated malaria patients (n=504).

|                                        | Unadjusted<br>odds ratio [95%CI] | P      | Adjusted<br>odds ratio [95%CI]* | P     | P<br>interaction<br>sex |
|----------------------------------------|----------------------------------|--------|---------------------------------|-------|-------------------------|
| <b>Risk factors</b>                    |                                  |        |                                 |       |                         |
| Hypertension                           | 0.76 [0.69 to 0.84]              | <0.001 | 0.86 [0.77 to 0.96]             | 0.007 | 0.005                   |
| Hypercholesterolemia                   | 0.83 [0.75 to 0.92]              | <0.001 | 0.90 [0.80 to 1.00]             | 0.05  | 0.20                    |
| Diabetes                               | 0.82 [0.71 to 0.95]              | 0.009  | 0.98 [0.83 to 1.17]             | 0.86  | 0.15                    |
| Obesity                                | 0.91 [0.83 to 0.99]              | 0.036  | 0.96 [0.87 to 1.06]             | 0.40  | 0.36                    |
| Smoking                                | 0.83 [0.76 to 0.91]              | <0.001 | 0.93 [0.84 to 1.03]             | 0.16  | 0.003                   |
| Heathy diet                            | 1.19 [1.00 to 1.18]              | 0.047  | 1.09 [1.00 to 1.19]             | 0.049 | 0.012                   |
| Physical activity                      | 1.12 [1.03 to 1.22]              | 0.010  | 1.06 [0.96 to 1.17]             | 0.22  | 0.001                   |
| <b>Subclinical cardiac<br/>disease</b> |                                  |        |                                 |       |                         |
| LV ejection fraction <45%              | 0.92 [0.73 to 1.16]              | 0.49   | 1.02 [0.79 to 1.31]             | 0.88  | 0.91                    |
| LV hypertrophy                         | 0.92 [0.74 to 1.15]              | 0.47   | 1.10 [0.84 to 1.44]             | 0.48  | 0.33                    |
| Diastolic dysfunction                  | 0.85 [0.68 to 1.08]              | 0.18   | 1.05 [0.77 to 1.43]             | 0.77  | 0.23                    |

\*Multivariable models were mutually adjusted for cardiovascular risk factors (hypertension, hypercholesterolemia, diabetes, obesity, smoking, healthy diet, physical activity) in addition to age, sex, work, family income, living area (rural/urban) and prior heart disease  
LV: left ventricular

### Supplemental Figure 1. Forest plot

Association between self-rated health (per 10-point increase) and cardiovascular risk factors stratified by sex. \* indicates that the association remained significant in multivariable models.

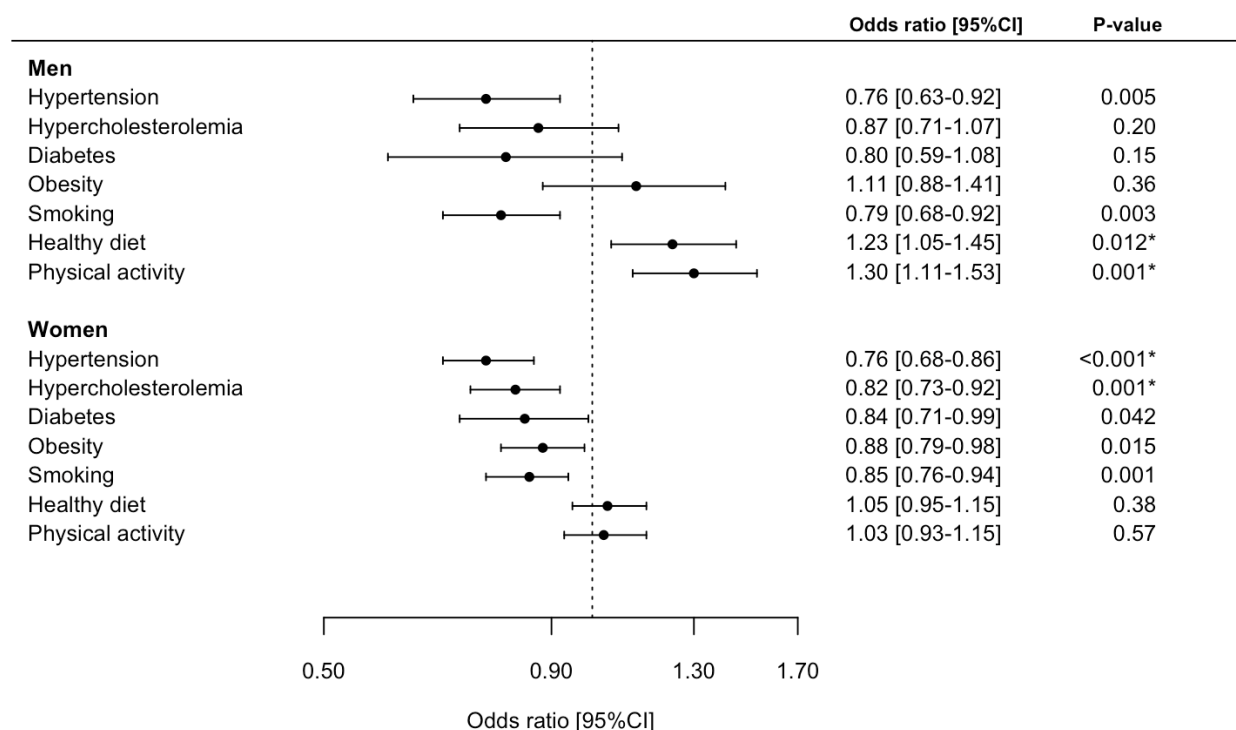

STROBE Statement—Checklist of items that should be included in reports of *cross-sectional studies*

|                           | Item No | Recommendation                                                                                                                                                                                               | Page No  |
|---------------------------|---------|--------------------------------------------------------------------------------------------------------------------------------------------------------------------------------------------------------------|----------|
| <b>Title and abstract</b> | 1       | (a) Indicate the study's design with a commonly used term in the title or the abstract                                                                                                                       | 1-2      |
|                           |         | (b) Provide in the abstract an informative and balanced summary of what was done and what was found                                                                                                          | 2        |
| <b>Introduction</b>       |         |                                                                                                                                                                                                              |          |
| Background/rationale      | 2       | Explain the scientific background and rationale for the investigation being reported                                                                                                                         | 4        |
| Objectives                | 3       | State specific objectives, including any prespecified hypotheses                                                                                                                                             | 4        |
| <b>Methods</b>            |         |                                                                                                                                                                                                              |          |
| Study design              | 4       | Present key elements of study design early in the paper                                                                                                                                                      | 5        |
| Setting                   | 5       | Describe the setting, locations, and relevant dates, including periods of recruitment, exposure, follow-up, and data collection                                                                              | 5        |
| Participants              | 6       | (a) Give the eligibility criteria, and the sources and methods of selection of participants                                                                                                                  | 5-6      |
| Variables                 | 7       | Clearly define all outcomes, exposures, predictors, potential confounders, and effect modifiers. Give diagnostic criteria, if applicable                                                                     | 6-8      |
| Data sources/measurement  | 8*      | For each variable of interest, give sources of data and details of methods of assessment (measurement). Describe comparability of assessment methods if there is more than one group                         | 6-8      |
| Bias                      | 9       | Describe any efforts to address potential sources of bias                                                                                                                                                    | 5+9-10   |
| Study size                | 10      | Explain how the study size was arrived at                                                                                                                                                                    | 5        |
| Quantitative variables    | 11      | Explain how quantitative variables were handled in the analyses. If applicable, describe which groupings were chosen and why                                                                                 | 6        |
| Statistical methods       | 12      | (a) Describe all statistical methods, including those used to control for confounding                                                                                                                        | 9-10     |
|                           |         | (b) Describe any methods used to examine subgroups and interactions                                                                                                                                          | 9-10     |
|                           |         | (c) Explain how missing data were addressed                                                                                                                                                                  | 9-10     |
|                           |         | (d) If applicable, describe analytical methods taking account of sampling strategy                                                                                                                           | N/A      |
|                           |         | (e) Describe any sensitivity analyses                                                                                                                                                                        | 9-10     |
| <b>Results</b>            |         |                                                                                                                                                                                                              |          |
| Participants              | 13*     | (a) Report numbers of individuals at each stage of study—eg numbers potentially eligible, examined for eligibility, confirmed eligible, included in the study, completing follow-up, and analysed            | 11       |
|                           |         | (b) Give reasons for non-participation at each stage                                                                                                                                                         | N/A      |
|                           |         | (c) Consider use of a flow diagram                                                                                                                                                                           | Figure 1 |
| Descriptive data          | 14*     | (a) Give characteristics of study participants (eg demographic, clinical, social) and information on exposures and potential confounders                                                                     | 10       |
|                           |         | (b) Indicate number of participants with missing data for each variable of interest                                                                                                                          | N/A      |
| Outcome data              | 15*     | Report numbers of outcome events or summary measures                                                                                                                                                         | 11       |
| Main results              | 16      | (a) Give unadjusted estimates and, if applicable, confounder-adjusted estimates and their precision (eg, 95% confidence interval). Make clear which confounders were adjusted for and why they were included | 11       |
|                           |         | (b) Report category boundaries when continuous variables were categorized                                                                                                                                    | N/A      |
|                           |         | (c) If relevant, consider translating estimates of relative risk into absolute risk for a meaningful time period                                                                                             | N/A      |

|                          |    |                                                                                                                                                                            |       |
|--------------------------|----|----------------------------------------------------------------------------------------------------------------------------------------------------------------------------|-------|
| Other analyses           | 17 | Report other analyses done—eg analyses of subgroups and interactions, and sensitivity analyses                                                                             | 11-12 |
| <b>Discussion</b>        |    |                                                                                                                                                                            |       |
| Key results              | 18 | Summarise key results with reference to study objectives                                                                                                                   | 13    |
| Limitations              | 19 | Discuss limitations of the study, taking into account sources of potential bias or imprecision. Discuss both direction and magnitude of any potential bias                 | 15-16 |
| Interpretation           | 20 | Give a cautious overall interpretation of results considering objectives, limitations, multiplicity of analyses, results from similar studies, and other relevant evidence | 16    |
| Generalisability         | 21 | Discuss the generalisability (external validity) of the study results                                                                                                      | 13-16 |
| <b>Other information</b> |    |                                                                                                                                                                            |       |
| Funding                  | 22 | Give the source of funding and the role of the funders for the present study and, if applicable, for the original study on which the present article is based              | 18    |

\*Give information separately for exposed and unexposed groups.

**Note:** An Explanation and Elaboration article discusses each checklist item and gives methodological background and published examples of transparent reporting. The STROBE checklist is best used in conjunction with this article (freely available on the Web sites of PLoS Medicine at <http://www.plosmedicine.org/>, Annals of Internal Medicine at <http://www.annals.org/>, and Epidemiology at <http://www.epidem.com/>). Information on the STROBE Initiative is available at [www.strobe-statement.org](http://www.strobe-statement.org).
